# Supplementary material for: Rapid Screening of 350 Pesticide Residues in Vegetable and Fruit Juices by Multi-Plug Filtration Cleanup Method Combined with Gas Chromatography-Electrostatic Field Orbitrap High Resolution Mass Spectrometry
Source: MDPI journal article supplement (doi:10.3390/foods10071651), 2021-07-16
Supplement: s1 [file s1]

**Table S1.** Retention time, fragment ions and accurate mass of 350 pesticides.

| Pesticides                        | CAS        | Molecular<br>Formula                                                         | Retention<br>time<br>(min) | Quantita<br>tive<br>ion(m/z) | Qualitative<br>ion(m/z) |           |
|-----------------------------------|------------|------------------------------------------------------------------------------|----------------------------|------------------------------|-------------------------|-----------|
|                                   |            |                                                                              |                            |                              | 1                       | 2         |
| Clopyralid                        | 1702-17-6  | C <sub>6</sub> H <sub>5</sub> Cl <sub>2</sub> NO <sub>2</sub>                | 6.37                       | 146.96371                    | 76.01817                | 111.99485 |
| Dichlorvos                        | 62-73-7    | C <sub>4</sub> H <sub>7</sub> O <sub>4</sub> PCl <sub>2</sub>                | 7.98                       | 184.97650                    | 186.97355               | 144.98158 |
| Methamidophos                     | 10265-92-6 | C <sub>2</sub> H <sub>8</sub> NO <sub>2</sub> PS                             | 8.01                       | 141.00079                    | 112.01585               | 125.97731 |
| Thiofanox                         | 39196-18-4 | C <sub>9</sub> H <sub>18</sub> N <sub>2</sub> O <sub>2</sub> S               | 8.19                       | 115.09917                    | 161.08689               | 83.07295  |
| Allidochlor                       | 93-71-0    | C <sub>8</sub> H <sub>12</sub> NOCI                                          | 8.26                       | 138.09134                    | 132.02107               | 96.08078  |
| Dichlobenil                       | 1194-65-6  | C <sub>7</sub> H <sub>5</sub> Cl <sub>2</sub> N                              | 8.67                       | 170.96371                    | 100.01818               | 172.96075 |
| EPTC                              | 759-94-4   | C <sub>9</sub> H <sub>19</sub> NOS                                           | 8.70                       | 128.10699                    | 132.08415               | 160.07906 |
| Dichlormid                        | 37764-25-3 | C <sub>8</sub> H <sub>11</sub> Cl <sub>2</sub> NO                            | 8.71                       | 172.05236                    | 108.08077               | 165.98209 |
| 2,4,6-Trichlorophenol             | 88-06-2    | C <sub>6</sub> H <sub>3</sub> OCl <sub>3</sub>                               | 8.72                       | 195.92440                    | 199.91850               | 197.92145 |
| 3,5-Dichloroaniline               | 626-43-7   | C <sub>6</sub> H <sub>5</sub> Cl <sub>2</sub> N                              | 9.04                       | 160.97936                    | 162.97640               | 126.01050 |
| O-Phthalimide                     | 85-41-6    | C <sub>8</sub> H <sub>5</sub> NO <sub>2</sub>                                | 9.14                       | 147.03147                    | 103.04165               | 104.02566 |
| Mevinphos                         | 7786-34-7  | C <sub>7</sub> H <sub>13</sub> O <sub>6</sub> P                              | 9.17                       | 192.01821                    | 164.02330               | 127.01547 |
| Acephate                          | 30560-19-1 | C <sub>4</sub> H <sub>10</sub> NO <sub>3</sub> PS                            | 9.24                       | 136.01581                    | 112.01581               | 94.00524  |
| Vernolate                         | 1929-77-7  | C <sub>10</sub> H <sub>21</sub> NOS                                          | 9.29                       | 86.06004                     | 161.08688               | 146.09979 |
| Propham                           | 122-42-9   | C <sub>10</sub> H <sub>13</sub> NO <sub>2</sub>                              | 9.36                       | 137.04712                    | 179.09408               | 120.08077 |
| Etridiazole                       | 2593-15-9  | C <sub>5</sub> H <sub>5</sub> N <sub>2</sub> OSCl <sub>3</sub>               | 9.39                       | 210.94942                    | 212.94646               | 182.91812 |
| Pebulate                          | 1114-71-2  | C <sub>10</sub> H <sub>21</sub> NOS                                          | 9.39                       | 128.10699                    | 72.04439                | 161.08689 |
| cis-1,2,3,6-Tetrahydrophthalimide | 1469-48-3  | C <sub>8</sub> H <sub>9</sub> NO <sub>2</sub>                                | 9.56                       | 151.06280                    | 123.06790               | 122.06000 |
| Chloroneb                         | 2675-77-6  | C <sub>8</sub> H <sub>8</sub> O <sub>2</sub> Cl <sub>2</sub>                 | 9.76                       | 190.96611                    | 192.96316               | 205.98958 |
| Tebuthiuron                       | 34014-18-1 | C <sub>9</sub> H <sub>16</sub> N <sub>4</sub> OS                             | 9.85                       | 156.05899                    | 89.01679                | 171.08246 |
| Fenobucarb                        | 3766-81-2  | C <sub>12</sub> H <sub>17</sub> NO <sub>2</sub>                              | 9.92                       | 121.06479                    | 91.05423                | 93.06988  |
| Pentachlorobenzene                | 608-93-5   | C <sub>6</sub> HCl <sub>5</sub>                                              | 9.94                       | 247.85154                    | 251.84563               | 249.84858 |
| Isoproc carb                      | 2631-40-5  | C <sub>11</sub> H <sub>15</sub> NO <sub>2</sub>                              | 9.97                       | 121.06479                    | 136.08827               | 103.05423 |
| Molinate                          | 2212-67-1  | C <sub>9</sub> H <sub>17</sub> NOS                                           | 10.00                      | 126.09134                    | 187.10254               | 98.09643  |
| Heptenophos                       | 23560-59-0 | C <sub>9</sub> H <sub>12</sub> CLO <sub>4</sub> P                            | 10.29                      | 124.00743                    | 215.04677               | 200.02330 |
| Chlorfenprop-methyl               | 14437-17-3 | C <sub>10</sub> H <sub>10</sub> O <sub>2</sub> Cl <sub>2</sub>               | 10.42                      | 165.01016                    | 196.02855               | 167.00721 |
| Omethoate                         | 1113-02-6  | C <sub>5</sub> H <sub>12</sub> NO <sub>4</sub> PS                            | 10.46                      | 156.00045                    | 110.01273               | 140.97697 |
| Propoxur                          | 114-26-1   | C <sub>11</sub> H <sub>15</sub> NO <sub>3</sub>                              | 10.56                      | 110.03623                    | 82.04131                | 152.08318 |
| Tecnazene                         | 117-18-0   | C <sub>6</sub> HNO <sub>2</sub> CL <sub>4</sub>                              | 10.58                      | 200.88269                    | 177.91383               | 260.87264 |
| Propachlor                        | 1918-16-7  | C <sub>11</sub> H <sub>14</sub> NOCI                                         | 10.60                      | 120.08077                    | 176.10699               | 169.02889 |
| Diphenylamine                     | 122-39-4   | C <sub>12</sub> H <sub>11</sub> N                                            | 10.69                      | 169.08860                    | 167.07295               | 168.08078 |
| Ethoprophos                       | 13194-48-4 | C <sub>8</sub> H <sub>19</sub> O <sub>2</sub> PS <sub>2</sub>                | 10.76                      | 157.96196                    | 199.00110               | 200.00891 |
| Cycloate                          | 1134-23-2  | C <sub>11</sub> H <sub>21</sub> NOS                                          | 10.78                      | 154.12264                    | 155.12600               | 72.04439  |
| 2,3,5,6-tetrachloroaniline        | 3481-20-7  | C <sub>6</sub> H <sub>3</sub> Cl <sub>4</sub> N                              | 10.79                      | 230.89846                    | 232.89551               | 157.95588 |
| Atrazine-desethyl                 | 6190-65-4  | C <sub>6</sub> H <sub>10</sub> N <sub>5</sub> Cl                             | 10.99                      | 172.03844                    | 145.01497               | 187.06192 |
| Dicrotophos                       | 141-66-2   | C <sub>8</sub> H <sub>16</sub> NO <sub>3</sub> P                             | 11.06                      | 127.01547                    | 193.02604               | 111.06787 |
| Methabenzthiazuron                | 18691-97-9 | C <sub>10</sub> H <sub>11</sub> N <sub>3</sub> OS                            | 11.06                      | 136.02154                    | 164.04027               | 135.01372 |
| Trifluralin                       | 1582-09-8  | C <sub>13</sub> H <sub>16</sub> N <sub>3</sub> O <sub>4</sub> F <sub>3</sub> | 11.07                      | 264.02152                    | 306.06961               | 248.02775 |

|                         |             |                                                                                |       |           |           |           |
|-------------------------|-------------|--------------------------------------------------------------------------------|-------|-----------|-----------|-----------|
| Bendiocarb              | 22781-23-3  | C <sub>11</sub> H <sub>13</sub> NO <sub>4</sub>                                | 11.08 | 151.03897 | 126.03114 | 223.08390 |
| Benfluralin             | 1861-40-1   | C <sub>13</sub> H <sub>16</sub> F <sub>3</sub> N <sub>3</sub> O <sub>4</sub>   | 11.11 | 292.05282 | 276.05905 | 318.10600 |
| Sulfotep                | 3689-24-5   | C <sub>8</sub> H <sub>20</sub> O <sub>5</sub> P <sub>2</sub> S <sub>2</sub>    | 11.19 | 322.02218 | 209.89698 | 173.95687 |
| Cadusafos               | 95465-99-9  | C <sub>10</sub> H <sub>23</sub> O <sub>3</sub> PS <sub>2</sub>                 | 11.24 | 158.96979 | 130.93848 | 213.01673 |
| Tebutam                 | 35256-85-0  | C <sub>15</sub> H <sub>23</sub> NO                                             | 11.26 | 91.05422  | 190.12264 | 233.17741 |
| Promecarb               | 2631-37-0   | C <sub>12</sub> H <sub>17</sub> NO <sub>2</sub>                                | 11.26 | 135.08044 | 107.08552 | 150.10391 |
| Phorate                 | 298-02-2    | C <sub>7</sub> H <sub>17</sub> O <sub>2</sub> PS <sub>3</sub>                  | 11.33 | 75.02629  | 230.97315 | 260.01227 |
| Atratone                | 1610-17-9   | C <sub>9</sub> H <sub>17</sub> N <sub>5</sub> O                                | 11.60 | 169.09581 | 154.07233 | 211.14276 |
| 3,4,5-Trimethacarb      | 2686-99-9   | C <sub>11</sub> H <sub>15</sub> NO <sub>2</sub>                                | 11.68 | 121.06479 | 91.05422  | 136.08826 |
| Dicloran                | 99-30-9     | C <sub>6</sub> H <sub>4</sub> Cl <sub>2</sub> N <sub>2</sub> O <sub>2</sub>    | 11.69 | 175.96644 | 159.97153 | 207.96148 |
| Pentachloroanisole      | 1825-21-4   | C <sub>7</sub> H <sub>3</sub> Cl <sub>5</sub> O                                | 11.71 | 264.83567 | 238.83781 | 279.85915 |
| Ethoxyquin              | 91-53-2     | C <sub>14</sub> H <sub>19</sub> NO                                             | 11.71 | 202.12264 | 174.09134 | 203.12599 |
| Prometon                | 1610-18-0   | C <sub>10</sub> H <sub>19</sub> N <sub>5</sub> O                               | 11.72 | 168.08798 | 210.13493 | 225.15841 |
| Atrazine                | 1912-24-9   | C <sub>8</sub> H <sub>14</sub> ClN <sub>5</sub>                                | 11.83 | 200.06975 | 202.06680 | 173.04627 |
| Monolinuron             | 1746-81-2   | C <sub>9</sub> H <sub>11</sub> ClN <sub>2</sub> O <sub>2</sub>                 | 11.88 | 126.01050 | 152.99759 | 214.05036 |
| Propazine               | 139-40-2    | C <sub>9</sub> H <sub>16</sub> N <sub>5</sub> Cl                               | 11.91 | 214.08539 | 187.06192 | 229.10887 |
| Clomazone               | 81777-89-1  | C <sub>12</sub> H <sub>14</sub> ClNO <sub>2</sub>                              | 11.93 | 204.10190 | 89.03857  | 125.01525 |
| α-Hexachlorocyclohexane | 319-84-6    | C <sub>6</sub> H <sub>6</sub> Cl <sub>6</sub>                                  | 11.94 | 180.93730 | 145.96845 | 218.91103 |
| Terbumeton              | 33693-04-8  | C <sub>10</sub> H <sub>19</sub> N <sub>5</sub> O                               | 11.94 | 210.13493 | 169.09581 | 225.15841 |
| β-Hexachlorocyclohexane | 319-85-7    | C <sub>6</sub> H <sub>6</sub> Cl <sub>6</sub>                                  | 11.98 | 180.93730 | 145.96845 | 218.91103 |
| Aminocarb               | 2032-59-9   | C <sub>11</sub> H <sub>16</sub> N <sub>2</sub> O <sub>2</sub>                  | 12.03 | 151.09916 | 136.07569 | 150.09134 |
| Isocarbamid             | 30979-48-7  | C <sub>8</sub> H <sub>15</sub> N <sub>3</sub> O <sub>2</sub>                   | 12.04 | 142.06110 | 130.06110 | 113.03455 |
| Cyromazine              | 66215-27-8  | C <sub>6</sub> H <sub>10</sub> N <sub>6</sub>                                  | 12.05 | 151.07267 | 165.08832 | 166.09614 |
| γ-Hexachlorocyclohexane | 58-89-9     | C <sub>6</sub> H <sub>6</sub> Cl <sub>6</sub>                                  | 12.11 | 180.93730 | 145.96845 | 218.91103 |
| Propetamphos            | 31218-83-4  | C <sub>10</sub> H <sub>20</sub> NO <sub>4</sub> PS                             | 12.11 | 138.01369 | 193.97971 | 222.03482 |
| Cycluron                | 2163-69-1   | C <sub>11</sub> H <sub>22</sub> N <sub>2</sub> O                               | 12.12 | 198.17266 | 127.08659 | 169.13354 |
| Terbutylazine           | 5915-41-3   | C <sub>9</sub> H <sub>16</sub> N <sub>5</sub> Cl                               | 12.13 | 186.05409 | 188.05114 | 201.07757 |
| Terbufos                | 13071-79-9  | C <sub>9</sub> H <sub>21</sub> O <sub>2</sub> PS <sub>3</sub>                  | 12.15 | 230.97315 | 174.91055 | 202.94185 |
| Cyanophos               | 2636-26-2   | C <sub>9</sub> H <sub>10</sub> NO <sub>3</sub> PS                              | 12.16 | 243.01135 | 124.98206 | 109.00491 |
| Trietazine              | 1912-26-1   | C <sub>9</sub> H <sub>16</sub> N <sub>5</sub> Cl                               | 12.16 | 200.06974 | 214.08539 | 229.10887 |
| Quintozene              | 82-68-8     | C <sub>6</sub> NO <sub>2</sub> Cl <sub>5</sub>                                 | 12.22 | 213.87191 | 248.84076 | 294.83366 |
| Fonofos                 | 944-22-9    | C <sub>10</sub> H <sub>15</sub> OPS <sub>2</sub>                               | 12.26 | 246.02964 | 137.01845 | 108.98715 |
| Pyroquilon              | 57369-32-1  | C <sub>11</sub> H <sub>11</sub> NO                                             | 12.27 | 173.08351 | 144.08077 | 172.07569 |
| Dinoterb                | 1420-07-1   | C <sub>10</sub> H <sub>12</sub> N <sub>2</sub> O <sub>5</sub>                  | 12.34 | 225.05059 | 177.04204 | 161.04712 |
| Pyrimethanil            | 53112-28-0  | C <sub>12</sub> H <sub>13</sub> N <sub>3</sub>                                 | 12.34 | 198.10257 | 199.11039 | 183.07909 |
| Diazinon                | 333-41-5    | C <sub>12</sub> H <sub>21</sub> N <sub>2</sub> O <sub>3</sub> PS               | 12.35 | 179.11789 | 199.06309 | 304.10050 |
| Flufenoxuron            | 101463-69-8 | C <sub>21</sub> H <sub>11</sub> ClF <sub>6</sub> N <sub>2</sub> O <sub>3</sub> | 12.45 | 331.00177 | 268.03800 | 296.03292 |
| Disulfoton              | 298-04-4    | C <sub>8</sub> H <sub>19</sub> O <sub>2</sub> PS <sub>3</sub>                  | 12.50 | 88.03412  | 153.01336 | 141.96704 |
| Paraoxon-methyl         | 950-35-6    | C <sub>8</sub> H <sub>10</sub> NO <sub>6</sub> P                               | 12.51 | 230.02129 | 247.02402 | 200.02330 |
| Secbumeton              | 26259-45-0  | C <sub>10</sub> H <sub>19</sub> N <sub>5</sub> O                               | 12.51 | 196.11928 | 169.09581 | 210.13493 |
| Aziprotryne             | 4658-28-0   | C <sub>7</sub> H <sub>11</sub> N <sub>7</sub> S                                | 12.52 | 182.04949 | 139.00729 | 225.07911 |
| Dinitramine             | 29091-05-2  | C <sub>11</sub> H <sub>13</sub> F <sub>3</sub> N <sub>4</sub> O <sub>4</sub>   | 12.52 | 305.08560 | 244.05665 | 261.05939 |
| Fenfuram                | 24691-80-3  | C <sub>12</sub> H <sub>11</sub> NO <sub>2</sub>                                | 12.56 | 201.07843 | 184.05188 | 109.02841 |
| δ-Hexachlorocyclohexane | 319-86-8    | C <sub>6</sub> H <sub>6</sub> Cl <sub>6</sub>                                  | 12.60 | 180.93730 | 145.96845 | 218.91103 |

|                     |             |                                                                               |       |           |           |           |
|---------------------|-------------|-------------------------------------------------------------------------------|-------|-----------|-----------|-----------|
| Mexacarbate         | 315-18-4    | C <sub>12</sub> H <sub>18</sub> N <sub>2</sub> O <sub>2</sub>                 | 12.62 | 165.11481 | 164.10699 | 222.13627 |
| Isazofos            | 42509-80-8  | C <sub>7</sub> H <sub>13</sub> N <sub>3</sub> O <sub>3</sub> PSCl             | 12.65 | 162.04268 | 161.03504 | 177.01202 |
| Chlorothalonil      | 1897-45-6   | C <sub>8</sub> Cl <sub>4</sub> N <sub>2</sub>                                 | 12.70 | 263.88101 | 193.94330 | 228.91215 |
| Triallate           | 2303-17-5   | C <sub>10</sub> H <sub>16</sub> Cl <sub>3</sub> NOS                           | 12.70 | 268.03242 | 270.02947 | 142.92166 |
| Tebupirimfos        | 96182-53-5  | C <sub>13</sub> H <sub>23</sub> N <sub>2</sub> O <sub>3</sub> PS              | 12.81 | 234.02225 | 261.04572 | 276.06920 |
| musk ambrette       | 83-66-9     | C <sub>12</sub> H <sub>16</sub> N <sub>2</sub> O <sub>5</sub>                 | 12.82 | 253.08189 | 251.10263 | 268.10537 |
| Oxabetrinil         | 74782-23-3  | C <sub>12</sub> H <sub>12</sub> N <sub>2</sub> O <sub>3</sub>                 | 12.84 | 73.02840  | 103.04165 | 114.03382 |
| Iprobenfos          | 26087-47-8  | C <sub>13</sub> H <sub>21</sub> O <sub>3</sub> PS                             | 12.86 | 204.00045 | 171.02056 | 246.04740 |
| Fluroxypyr          | 69377-81-7  | C <sub>7</sub> H <sub>5</sub> N <sub>2</sub> O <sub>3</sub> FCI <sub>2</sub>  | 12.91 | 180.97300 | 208.96792 | 195.96009 |
| Pirimicarb          | 23103-98-2  | C <sub>11</sub> H <sub>18</sub> N <sub>4</sub> O <sub>2</sub>                 | 12.94 | 238.14243 | 166.09749 | 137.07094 |
| Monalide            | 7287-36-7   | C <sub>13</sub> H <sub>18</sub> NOCl                                          | 12.94 | 197.06019 | 127.01832 | 239.10714 |
| Furmecyclox         | 60568-05-0  | C <sub>14</sub> H <sub>21</sub> NO <sub>3</sub>                               | 12.97 | 123.04406 | 251.15159 | 124.04741 |
| Benoxacor           | 98730-04-2  | C <sub>11</sub> H <sub>11</sub> NO <sub>2</sub> Cl <sub>2</sub>               | 12.98 | 120.04439 | 259.01613 | 261.01318 |
| Pentachloroaniline  | 527-20-8    | C <sub>6</sub> H <sub>2</sub> Cl <sub>5</sub> N                               | 13.13 | 262.86244 | 191.91690 | 229.89063 |
| Benfuresate         | 68505-69-1  | C <sub>12</sub> H <sub>16</sub> O <sub>4</sub> S                              | 13.16 | 163.07536 | 121.06479 | 256.07638 |
| Dioxacarb           | 6988-21-2   | C <sub>11</sub> H <sub>13</sub> NO <sub>4</sub>                               | 13.16 | 121.02840 | 165.05462 | 166.06244 |
| Cyprazine           | 22936-86-3  | C <sub>9</sub> H <sub>14</sub> N <sub>5</sub> Cl                              | 13.23 | 212.06974 | 170.02279 | 226.08539 |
| Phosphamidon        | 13171-21-6  | C <sub>10</sub> H <sub>19</sub> NO <sub>5</sub> PCl                           | 13.24 | 138.09134 | 193.02603 | 264.09953 |
| Dichlorprop         | 120-36-5    | C <sub>9</sub> H <sub>8</sub> O <sub>3</sub> Cl <sub>2</sub>                  | 13.25 | 161.96337 | 132.96093 | 188.98684 |
| Dichlofenthion      | 97-17-6     | C <sub>10</sub> H <sub>13</sub> Cl <sub>2</sub> O <sub>3</sub> PS             | 13.25 | 222.93818 | 250.96948 | 279.00060 |
| Fenthion            | 55-38-9     | C <sub>10</sub> H <sub>15</sub> O <sub>3</sub> PS <sub>2</sub>                | 13.25 | 222.93818 | 250.96948 | 279.00060 |
| Propanil            | 709-98-8    | C <sub>9</sub> H <sub>9</sub> NOCl <sub>2</sub>                               | 13.25 | 160.97935 | 162.97640 | 219.00262 |
| 2,4-DB              | 94-82-6     | C <sub>10</sub> H <sub>10</sub> O <sub>3</sub> Cl <sub>2</sub>                | 13.25 | 161.96337 | 125.98669 | 97.99177  |
| Chlorthiamid        | 1918-13-4   | C <sub>7</sub> H <sub>5</sub> Cl <sub>2</sub> NS                              | 13.28 | 169.98257 | 171.97962 | 204.95142 |
| Dimethachlor        | 50563-36-5  | C <sub>13</sub> H <sub>18</sub> NO <sub>2</sub> Cl                            | 13.28 | 197.06019 | 148.07569 | 134.09643 |
| Metribuzin          | 21087-64-9  | C <sub>8</sub> H <sub>14</sub> N <sub>4</sub> OS                              | 13.30 | 198.06955 | 144.04641 | 182.03825 |
| Dimethenamid        | 87674-68-8  | C <sub>12</sub> H <sub>18</sub> NO <sub>2</sub> SCl                           | 13.31 | 154.06849 | 230.04008 | 232.03713 |
| Bromobutide         | 74712-19-9  | C <sub>15</sub> H <sub>22</sub> NOBr                                          | 13.34 | 119.08552 | 120.08077 | 232.16959 |
| Terbucarb           | 1918-11-2   | C <sub>17</sub> H <sub>27</sub> NO <sub>2</sub>                               | 13.43 | 205.15869 | 177.12739 | 220.18216 |
| Malaoxon            | 1634-78-2   | C <sub>10</sub> H <sub>9</sub> O <sub>7</sub> PS                              | 13.45 | 268.01650 | 194.98754 | 238.97737 |
| Vinclozolin         | 50471-44-8  | C <sub>12</sub> H <sub>9</sub> Cl <sub>2</sub> NO <sub>3</sub>                | 13.47 | 178.04180 | 212.00283 | 284.99539 |
| Parathion-methyl    | 298-00-0    | C <sub>8</sub> H <sub>10</sub> NO <sub>5</sub> PS                             | 13.48 | 263.00118 | 124.98210 | 245.99844 |
| Chlorpyrifos-methyl | 5598-13-0   | C <sub>7</sub> H <sub>7</sub> Cl <sub>3</sub> NO <sub>3</sub> PS              | 13.49 | 285.92558 | 287.92263 | 289.91968 |
| Transfluthrin       | 118712-89-3 | C <sub>15</sub> H <sub>12</sub> O <sub>2</sub> F <sub>4</sub> Cl <sub>2</sub> | 13.53 | 163.01653 | 127.03090 | 335.04564 |
| Simetryn            | 1014-70-6   | C <sub>8</sub> H <sub>15</sub> N <sub>5</sub> S                               | 13.55 | 213.10426 | 155.03859 | 170.04949 |
| Fuberidazole        | 3878-19-1   | C <sub>11</sub> H <sub>8</sub> N <sub>2</sub> O                               | 13.56 | 184.06311 | 156.06820 | 183.05529 |
| Tolclofos-methyl    | 57018-04-9  | C <sub>9</sub> H <sub>11</sub> O <sub>3</sub> PSCL <sub>2</sub>               | 13.60 | 264.98496 | 249.96166 | 266.98200 |
| Alachlor            | 15972-60-8  | C <sub>14</sub> H <sub>20</sub> NO <sub>2</sub> Cl                            | 13.66 | 188.10699 | 202.12260 | 160.11208 |
| Ametryn             | 834-12-8    | C <sub>9</sub> H <sub>17</sub> N <sub>5</sub> S                               | 13.66 | 227.11991 | 170.04949 | 185.07296 |
| Heptachlor          | 76-44-8     | C <sub>10</sub> H <sub>5</sub> CL <sub>7</sub>                                | 13.71 | 269.81257 | 100.00742 | 336.84874 |
| Prometryn           | 7287-19-6   | C <sub>10</sub> H <sub>19</sub> N <sub>5</sub> S                              | 13.74 | 241.13557 | 184.06514 | 199.08862 |
| Acetochlor          | 34256-82-1  | C <sub>14</sub> H <sub>20</sub> NO <sub>2</sub> Cl                            | 13.75 | 223.07584 | 162.09134 | 174.09134 |
| Paraoxon-ethyl      | 311-45-5    | C <sub>10</sub> H <sub>14</sub> NO <sub>6</sub> P                             | 13.76 | 275.05533 | 247.02403 | 139.05186 |
| Metalaxyl           | 57837-19-1  | C <sub>15</sub> H <sub>21</sub> NO <sub>4</sub>                               | 13.77 | 160.11207 | 206.11755 | 146.09642 |
| Tridiphane          | 58138-08-2  | C <sub>10</sub> H <sub>7</sub> OCl <sub>5</sub>                               | 13.83 | 186.97119 | 172.95554 | 284.92160 |

|                           |             |                                                                                 |              |           |           |           |
|---------------------------|-------------|---------------------------------------------------------------------------------|--------------|-----------|-----------|-----------|
| Octachlorodipropyl ether  | 127-90-2    | C <sub>6</sub> H <sub>6</sub> OCls                                              | 13.88        | 129.91383 | 108.96063 | 142.92165 |
| Prosulfocarb              | 52888-80-9  | C <sub>14</sub> H <sub>21</sub> NOS                                             | 13.88        | 128.10699 | 86.06004  | 251.13383 |
| Fenpropidin               | 67306-00-7  | C <sub>19</sub> H <sub>31</sub> N                                               | 13.96        | 98.09643  | 273.24510 | 258.22160 |
| 1-Naphthylacetamide       | 86-86-2     | C <sub>12</sub> H <sub>11</sub> NO                                              | 14.04        | 141.06987 | 142.07770 | 185.08351 |
| Dithiopyr                 | 97886-45-8  | C <sub>15</sub> H <sub>16</sub> NO <sub>2</sub> F <sub>5</sub> S <sub>2</sub>   | 14.04        | 306.05479 | 258.05314 | 354.05816 |
| Orbencarb                 | 34622-58-7  | C <sub>12</sub> H <sub>16</sub> NOSCl                                           | 14.07        | 222.09471 | 125.01525 | 100.07569 |
| Terbutryn                 | 886-50-0    | C <sub>10</sub> H <sub>19</sub> N <sub>5</sub> S                                | 14.07        | 226.11209 | 185.07297 | 170.04949 |
| Spiroxamine               | 118134-30-8 | C <sub>18</sub> H <sub>35</sub> NO <sub>2</sub>                                 | 14.10        | 100.11207 | 126.12772 | 198.14885 |
| Methiocarb                | 2032-65-7   | C <sub>11</sub> H <sub>15</sub> NO <sub>2</sub> S                               | 14.14        | 168.06034 | 153.03686 | 154.04022 |
| Fenitrothion              | 122-14-5    | C <sub>9</sub> H <sub>12</sub> NO <sub>5</sub> PS                               | 14.15        | 260.01409 | 124.98206 | 277.01683 |
| Pirimiphos-methyl         | 29232-93-7  | C <sub>11</sub> H <sub>20</sub> N <sub>3</sub> O <sub>3</sub> PS                | 14.18        | 290.07227 | 276.05662 | 305.09575 |
| Methiocarb sulfone        | 2179-25-1   | C <sub>11</sub> H <sub>15</sub> NO <sub>4</sub> S                               | 14.21        | 200.05017 | 197.02669 | 197.02669 |
| Ethofumesate              | 26225-79-6  | C <sub>13</sub> H <sub>18</sub> O <sub>5</sub> S                                | 14.21        | 207.10157 | 161.05971 | 179.07027 |
| Linuron                   | 330-55-2    | C <sub>9</sub> H <sub>10</sub> N <sub>2</sub> O <sub>2</sub> Cl <sub>2</sub>    | 14.26        | 159.97153 | 61.05221  | 248.01138 |
| Probenazole               | 27605-76-1  | C <sub>10</sub> H <sub>9</sub> NO <sub>5</sub> S                                | 14.32        | 130.06519 | 103.04165 | 158.06004 |
| Noruron                   | 18530-56-8  | C <sub>13</sub> H <sub>22</sub> N <sub>2</sub> O                                | 14.33        | 153.10224 | 193.13353 | 207.14919 |
| Quinoclamine              | 2797-51-5   | C <sub>10</sub> H <sub>6</sub> NO <sub>2</sub> Cl                               | 14.36        | 172.03930 | 144.04439 | 207.00815 |
| Dipropetryn               | 4147-51-7   | C <sub>11</sub> H <sub>21</sub> N <sub>5</sub> S                                | 14.37        | 255.15121 | 222.17132 | 184.06514 |
| Malathion                 | 121-75-5    | C <sub>10</sub> H <sub>19</sub> O <sub>6</sub> PS <sub>2</sub>                  | 14.40        | 124.98206 | 99.00767  | 173.08083 |
| Thiobencarb               | 28249-77-6  | C <sub>12</sub> H <sub>16</sub> ClNOS                                           | 14.43        | 257.06356 | 100.07569 | 125.01525 |
| Diethofencarb             | 87130-20-9  | C <sub>14</sub> H <sub>21</sub> NO <sub>4</sub>                                 | 14.50        | 267.14651 | 225.09956 | 168.02913 |
| Phorate sulfoxide         | 2588-03-6   | C <sub>7</sub> H <sub>17</sub> O <sub>3</sub> PS <sub>3</sub>                   | 14.56        | 124.92791 | 170.96978 | 199.00108 |
| Metolachlor               | 51218-45-2  | C <sub>15</sub> H <sub>22</sub> NO <sub>2</sub> Cl                              | 14.60        | 162.12772 | 211.07584 | 238.09931 |
| Fenpropimorph             | 67564-91-4  | C <sub>20</sub> H <sub>33</sub> NO                                              | 14.66        | 128.10699 | 110.09642 | 173.13247 |
| Cyanazine                 | 21725-46-2  | C <sub>9</sub> H <sub>13</sub> ClN <sub>6</sub>                                 | 14.68        | 225.06500 | 212.05717 | 240.08847 |
| Chlorpyrifos              | 2921-88-2   | C <sub>9</sub> H <sub>11</sub> Cl <sub>3</sub> NO <sub>3</sub> PS               | 14.70        | 196.91964 | 257.89428 | 313.95688 |
| Parathion                 | 56-38-2     | C <sub>10</sub> H <sub>14</sub> NO <sub>5</sub> PS                              | 14.72        | 291.03248 | 155.00355 | 185.99510 |
| Flufenacet                | 142459-58-3 | C <sub>14</sub> H <sub>13</sub> N <sub>3</sub> O <sub>2</sub> F <sub>4</sub> S  | 14.78        | 210.97836 | 136.05571 | 151.07918 |
| Rabenzazol                | 40341-04-6  | C <sub>12</sub> H <sub>12</sub> N <sub>4</sub>                                  | 14.78        | 212.10564 | 170.07127 | 195.07909 |
| 4,4'-Dichlorobenzophenone | 90-98-2     | C <sub>13</sub> H <sub>8</sub> Cl <sub>2</sub> O                                | 14.79        | 138.99451 | 110.99960 | 249.99467 |
| Triadimefon               | 43121-43-3  | C <sub>14</sub> H <sub>16</sub> ClN <sub>3</sub> O <sub>2</sub>                 | 14.79        | 208.02722 | 210.02426 | 181.01632 |
| Chlorthal-dimethyl        | 1861-32-1   | C <sub>10</sub> H <sub>6</sub> CL <sub>4</sub> O <sub>4</sub>                   | 14.85        | 300.88013 | 298.88308 | 331.89852 |
| Dicapthon                 | 2463-84-5   | C <sub>8</sub> H <sub>9</sub> NO <sub>5</sub> PSCl                              | 14.85        | 261.99335 | 124.98206 | 216.00045 |
| Isofenphos-oxon           | 31120-85-1  | C <sub>15</sub> H <sub>24</sub> NO <sub>5</sub> P                               | 14.86        | 200.99473 | 229.02603 | 272.06823 |
| Isocarbophos              | 24353-61-5  | C <sub>11</sub> H <sub>16</sub> NO <sub>4</sub> PS                              | 14.89        | 135.99774 | 230.00353 | 121.02841 |
| Tetraconazole             | 112281-77-3 | C <sub>13</sub> H <sub>11</sub> Cl <sub>2</sub> F <sub>4</sub> N <sub>3</sub> O | 14.91        | 336.05212 | 136.00742 | 170.97608 |
| Isobenzan                 | 297-78-9    | C <sub>9</sub> H <sub>4</sub> CL <sub>8</sub> O                                 | 14.99        | 407.77649 | 274.85641 | 310.83309 |
| Flurochloridone           | 61213-25-0  | C <sub>12</sub> H <sub>10</sub> Cl <sub>2</sub> F <sub>3</sub> NO               | 15.00        | 174.05251 | 311.00860 | 313.00565 |
| Fenson                    | 80-38-6     | C <sub>12</sub> H <sub>9</sub> O <sub>3</sub> SCl                               | 15.02        | 267.99554 | 141.00048 | 269.99260 |
| Pyracarbolid              | 24691-76-7  | C <sub>13</sub> H <sub>15</sub> NO <sub>2</sub>                                 | 15.12        | 125.05970 | 217.10973 | 97.02840  |
| Dodemorph                 | 1593-77-7   | C <sub>18</sub> H <sub>35</sub> NO                                              | 15.12        | 154.12264 | 238.21654 | 281.27132 |
| Mgk 264                   | 113-48-4    | C <sub>17</sub> H <sub>25</sub> NO <sub>2</sub>                                 | 15.13, 15.44 | 164.07060 | 209.14103 | 210.14886 |
| Butralin                  | 33629-47-9  | C <sub>14</sub> H <sub>21</sub> N <sub>3</sub> O <sub>4</sub>                   | 15.15        | 266.11353 | 236.10297 | 220.10805 |
| Carbaryl                  | 63-25-2     | C <sub>12</sub> H <sub>11</sub> NO <sub>2</sub>                                 | 15.15        | 144.05696 | 115.05422 | 116.06205 |

|                      |             |                                                                                               |              |           |           |           |
|----------------------|-------------|-----------------------------------------------------------------------------------------------|--------------|-----------|-----------|-----------|
| Diphenamid           | 957-51-7    | C <sub>16</sub> H <sub>17</sub> NO                                                            | 15.20        | 167.08552 | 165.06987 | 152.06205 |
| Pirimiphos-ethyl     | 23505-41-1  | C <sub>13</sub> H <sub>24</sub> N <sub>3</sub> O <sub>3</sub> PS                              | 15.28        | 168.05899 | 318.10357 | 333.12705 |
| Isodrin              | 465-73-6    | C <sub>12</sub> H <sub>8</sub> Cl <sub>6</sub>                                                | 15.35        | 192.93731 | 361.87520 | 194.93436 |
| Aldrin               | 309-00-2    | C <sub>12</sub> H <sub>8</sub> CL <sub>6</sub>                                                | 15.35        | 260.85936 | 290.92963 | 326.90631 |
| Isopropalin          | 33820-53-0  | C <sub>15</sub> H <sub>23</sub> N <sub>3</sub> O <sub>4</sub>                                 | 15.35        | 280.12918 | 238.08223 | 264.13426 |
| Cyprodinil           | 121552-61-2 | C <sub>14</sub> H <sub>15</sub> N <sub>3</sub>                                                | 15.40        | 224.11822 | 225.12604 | 208.08692 |
| Isofenphos-methyl    | 99675-03-3  | C <sub>14</sub> H <sub>22</sub> NO <sub>4</sub> PS                                            | 15.41        | 199.01547 | 230.98754 | 241.06242 |
| Octachlorostyrene    | 29082-74-4  | C <sub>8</sub> Cl <sub>8</sub>                                                                | 15.53        | 305.81257 | 270.84371 | 379.74437 |
| Metazachlor          | 67129-08-2  | C <sub>14</sub> H <sub>16</sub> ClN <sub>3</sub> O                                            | 15.55        | 209.06019 | 133.08860 | 211.05724 |
| Dimethametryn        | 22936-75-0  | C <sub>11</sub> H <sub>21</sub> N <sub>5</sub> S                                              | 15.57        | 212.09644 | 185.07296 | 240.12774 |
| Pendimethalin        | 40487-42-1  | C <sub>13</sub> H <sub>19</sub> N <sub>3</sub> O <sub>4</sub>                                 | 15.59        | 252.09788 | 191.06893 | 162.07876 |
| Disulfoton-sulfone   | 2497-6-5    | C <sub>8</sub> H <sub>19</sub> O <sub>4</sub> PS <sub>3</sub>                                 | 15.61        | 153.01336 | 124.98206 | 213.01673 |
| Phorate sulfone      | 2588-04-7   | C <sub>7</sub> H <sub>17</sub> O <sub>4</sub> PS <sub>3</sub>                                 | 15.61        | 199.00108 | 124.98206 | 170.96978 |
| Terbufos sulfone     | 56070-16-7  | C <sub>9</sub> H <sub>21</sub> O <sub>4</sub> PS <sub>3</sub>                                 | 15.61        | 153.01336 | 199.00108 | 263.97081 |
| Paclobutrazol        | 76738-62-0  | C <sub>15</sub> H <sub>20</sub> ClN <sub>3</sub> O                                            | 15.63        | 236.05851 | 138.02307 | 167.02581 |
| Penconazole          | 66246-88-6  | C <sub>13</sub> H <sub>15</sub> N <sub>3</sub> Cl <sub>2</sub>                                | 15.63        | 248.09490 | 160.97333 | 158.97628 |
| Chlozolate           | 84332-86-5  | C <sub>13</sub> H <sub>11</sub> NO <sub>5</sub> Cl <sub>2</sub>                               | 15.71        | 186.95862 | 260.97680 | 188.95567 |
| Pyrifeno             | 88283-41-4  | C <sub>14</sub> H <sub>12</sub> N <sub>2</sub> OCl <sub>2</sub>                               | 15.71        | 262.00590 | 186.95862 | 227.03705 |
| Tolylfluani          | 731-27-1    | C <sub>10</sub> H <sub>13</sub> N <sub>2</sub> O <sub>2</sub> FS <sub>2</sub> Cl <sub>2</sub> | 15.74        | 237.96548 | 181.07940 | 239.96253 |
| Fosthiazate          | 98886-44-3  | C <sub>9</sub> H <sub>18</sub> NO <sub>3</sub> PS <sub>2</sub>                                | 15.79        | 195.01135 | 166.02119 | 226.98342 |
| Phosfolan            | 947-02-4    | C <sub>7</sub> H <sub>14</sub> NO <sub>3</sub> PS <sub>2</sub>                                | 15.79        | 139.95658 | 167.98787 | 266.98342 |
| Allethrin            | 584-79-2    | C <sub>19</sub> H <sub>26</sub> O <sub>3</sub>                                                | 15.83        | 123.11683 | 91.05423  | 136.08827 |
| Isofenphos           | 25311-71-1  | C <sub>15</sub> H <sub>24</sub> NO <sub>4</sub> PS                                            | 15.83        | 213.03112 | 184.99982 | 216.97138 |
| Captan               | 133-06-2    | C <sub>9</sub> H <sub>8</sub> NO <sub>2</sub> SCl <sub>3</sub>                                | 15.84        | 149.04713 | 105.03349 | 116.90601 |
| Fipronil             | 120068-37-3 | C <sub>12</sub> H <sub>4</sub> Cl <sub>2</sub> F <sub>6</sub> N <sub>4</sub> OS               | 15.87        | 366.94294 | 368.93975 | 212.94801 |
| Diclocymet           | 139920-32-4 | C <sub>15</sub> H <sub>18</sub> N <sub>2</sub> OCl <sub>2</sub>                               | 15.89, 16.37 | 221.04761 | 172.99193 | 277.11021 |
| Quinalphos           | 13593-03-8  | C <sub>12</sub> H <sub>15</sub> N <sub>2</sub> O <sub>3</sub> PS                              | 15.91        | 146.04746 | 157.07602 | 173.07094 |
| Phenthoate           | 2597-03-7   | C <sub>12</sub> H <sub>17</sub> O <sub>4</sub> PS <sub>2</sub>                                | 15.92        | 273.98817 | 121.01064 | 245.99325 |
| Triadimenol          | 55219-65-3  | C <sub>14</sub> H <sub>18</sub> N <sub>3</sub> O <sub>2</sub> Cl                              | 15.93        | 168.11314 | 112.05054 | 169.11649 |
| Dinobuton            | 973-21-7    | C <sub>14</sub> H <sub>18</sub> N <sub>2</sub> O <sub>7</sub>                                 | 15.99        | 211.03495 | 163.02639 | 205.06077 |
| Furalaxyl            | 57646-30-7  | C <sub>17</sub> H <sub>19</sub> NO <sub>4</sub>                                               | 16.02        | 242.11756 | 152.07060 | 146.09643 |
| Crotoxyphos          | 7700-17-6   | C <sub>14</sub> H <sub>19</sub> O <sub>6</sub> P                                              | 16.05        | 193.02604 | 127.01547 | 105.06988 |
| Procymidone          | 32809-16-8  | C <sub>13</sub> H <sub>11</sub> NO <sub>2</sub> Cl <sub>2</sub>                               | 16.10        | 283.01613 | 96.05696  | 255.02122 |
| Chlorbenside         | 103-17-3    | C <sub>13</sub> H <sub>10</sub> SCl <sub>2</sub>                                              | 16.14        | 125.01525 | 127.0123  | 267.98747 |
| Chlorflurenol-methyl | 2536-31-4   | C <sub>15</sub> H <sub>11</sub> O <sub>3</sub> Cl                                             | 16.21        | 215.02581 | 152.06205 | 274.03922 |
| Chlordane            | 5103-71-9   | C <sub>10</sub> H <sub>6</sub> Cl <sub>8</sub>                                                | 16.31, 16.57 | 372.82542 | 376.81952 | 374.82247 |
| Methidathion         | 950-37-8    | C <sub>6</sub> H <sub>11</sub> N <sub>2</sub> O <sub>4</sub> PS <sub>3</sub>                  | 16.32        | 145.00662 | 85.03964  | 147.00240 |
| Haloxypop-methyl     | 69806-40-2  | C <sub>16</sub> H <sub>13</sub> ClF <sub>3</sub> NO <sub>4</sub>                              | 16.38        | 375.04797 | 288.00288 | 179.98224 |
| Bromophos-ethyl      | 4824-78-6   | C <sub>10</sub> H <sub>12</sub> O <sub>3</sub> PSCl <sub>2</sub> Br                           | 16.40        | 300.84869 | 241.87159 | 358.90906 |
| Procyazine           | 32889-48-8  | C <sub>10</sub> H <sub>13</sub> N <sub>6</sub> Cl                                             | 16.42        | 210.05409 | 212.05114 | 252.08847 |
| Disulfoton-sulfoxide | 2497-07-6   | C <sub>8</sub> H <sub>19</sub> O <sub>3</sub> PS <sub>3</sub>                                 | 16.60        | 183.97761 | 124.98206 | 167.98269 |
| Tetrachlorvinphos    | 22248-79-9  | C <sub>10</sub> H <sub>9</sub> O <sub>4</sub> PCl <sub>4</sub>                                | 16.62        | 328.92985 | 203.92948 | 239.88756 |
| Endosulfan           | 959-98-8    | C <sub>9</sub> H <sub>6</sub> O <sub>3</sub> SCl <sub>6</sub>                                 | 16.66, 18.36 | 236.84076 | 169.96846 | 159.98411 |
| Mepanipyrim          | 110235-47-7 | C <sub>14</sub> H <sub>13</sub> N <sub>3</sub>                                                | 16.68        | 222.10257 | 221.09475 | 223.11040 |

|                                           |             |                                                                                |              |           |           |           |
|-------------------------------------------|-------------|--------------------------------------------------------------------------------|--------------|-----------|-----------|-----------|
| Butachlor                                 | 23184-66-9  | C <sub>17</sub> H <sub>26</sub> NO <sub>2</sub> Cl                             | 16.73        | 176.10699 | 188.10699 | 160.11208 |
| Ditalimfos                                | 5131-24-8   | C <sub>12</sub> H <sub>14</sub> NO <sub>4</sub> PS                             | 16.80        | 242.97497 | 208.96949 | 271.00627 |
| TCMTB                                     | 21564-17-0  | C <sub>9</sub> H <sub>6</sub> N <sub>2</sub> S <sub>3</sub>                    | 16.86        | 179.99361 | 166.98579 | 237.96876 |
| trans-Nonachlor                           | 39765-80-5  | C <sub>10</sub> H <sub>5</sub> Cl <sub>9</sub>                                 | 16.89        | 408.78350 | 404.78940 | 271.80962 |
| Chlorfenson                               | 80-33-1     | C <sub>12</sub> H <sub>8</sub> CL <sub>2</sub> O <sub>2</sub> S                | 16.93        | 174.96150 | 176.95855 | 301.95657 |
| Fenamiphos                                | 22224-92-6  | C <sub>13</sub> H <sub>22</sub> NO <sub>3</sub> PS                             | 16.94        | 303.10525 | 260.05047 | 217.00827 |
| Picoxystrobin                             | 117428-22-5 | C <sub>18</sub> H <sub>16</sub> NO <sub>4</sub> F <sub>3</sub>                 | 16.95        | 303.05016 | 173.05970 | 335.07637 |
| Napropamide                               | 15299-99-7  | C <sub>17</sub> H <sub>21</sub> NO <sub>2</sub>                                | 16.99        | 271.15668 | 72.08078  | 115.05423 |
| Hexaconazole                              | 79983-71-4  | C <sub>14</sub> H <sub>17</sub> Cl <sub>2</sub> N <sub>3</sub> O               | 17.05        | 213.99333 | 231.03380 | 174.97120 |
| Flutolanil                                | 66332-96-5  | C <sub>17</sub> H <sub>16</sub> NO <sub>2</sub> F <sub>3</sub>                 | 17.06        | 173.02087 | 281.06581 | 323.11276 |
| Prothiophos                               | 34643-46-4  | C <sub>11</sub> H <sub>15</sub> O <sub>2</sub> PS <sub>2</sub> Cl <sub>2</sub> | 17.17        | 308.99341 | 238.91516 | 266.94664 |
| Isoprothiolane                            | 50512-35-1  | C <sub>12</sub> H <sub>18</sub> O <sub>4</sub> S <sub>2</sub>                  | 17.18        | 117.99054 | 161.98037 | 290.06410 |
| Profenofos                                | 41198-08-7  | C <sub>11</sub> H <sub>15</sub> BrClO <sub>3</sub> PS                          | 17.25        | 338.96369 | 205.91286 | 207.91063 |
| tricyclazole                              | 41814-78-2  | C <sub>9</sub> H <sub>7</sub> N <sub>3</sub> S                                 | 17.34        | 189.03552 | 135.01372 | 161.01680 |
| Pretilachlor                              | 51218-49-6  | C <sub>17</sub> H <sub>26</sub> NO <sub>2</sub> Cl                             | 17.35        | 162.12772 | 202.12264 | 238.09931 |
| Dieldrin                                  | 60-57-1     | C <sub>12</sub> H <sub>8</sub> CL <sub>6</sub> O                               | 17.43        | 262.85641 | 81.03349  | 260.85936 |
| Oxadiazon                                 | 19666-30-9  | C <sub>15</sub> H <sub>18</sub> N <sub>2</sub> O <sub>3</sub> Cl <sub>2</sub>  | 17.50        | 174.95862 | 302.02194 | 344.06889 |
| Iprovalicarb                              | 140923-17-7 | C <sub>18</sub> H <sub>28</sub> N <sub>2</sub> O <sub>3</sub>                  | 17.51, 17.81 | 134.09642 | 116.07060 | 158.11755 |
| Carboxin                                  | 5234-68-4   | C <sub>12</sub> H <sub>13</sub> NO <sub>2</sub> S                              | 17.59        | 235.06615 | 218.03960 | 143.01613 |
| Myclobutanil                              | 88671-89-0  | C <sub>15</sub> H <sub>17</sub> ClN <sub>4</sub>                               | 17.59        | 179.02447 | 150.01050 | 245.05885 |
| p,p'-Dichlorodiphenyldichloroethy<br>lene | 72-55-9     | C <sub>14</sub> H <sub>8</sub> Cl <sub>4</sub>                                 | 17.63        | 315.93746 | 247.99681 | 245.99976 |
| Buprofezin                                | 69327-76-0  | C <sub>16</sub> H <sub>23</sub> N <sub>3</sub> OS                              | 17.67        | 175.08659 | 171.09505 | 249.10561 |
| Imazalil                                  | 35554-44-0  | C <sub>14</sub> H <sub>14</sub> Cl <sub>2</sub> N <sub>2</sub> O               | 17.69        | 174.95260 | 172.95555 | 158.97628 |
| Flusilazole                               | 85509-19-9  | C <sub>16</sub> H <sub>15</sub> N <sub>3</sub> F <sub>2</sub> Si               | 17.70        | 233.05926 | 206.05443 | 314.09196 |
| Methoprotryne                             | 841-06-5    | C <sub>11</sub> H <sub>21</sub> N <sub>5</sub> OS                              | 17.71        | 256.12266 | 184.06514 | 212.09644 |
| Azaconazole                               | 60207-31-0  | C <sub>12</sub> H <sub>11</sub> N <sub>3</sub> O <sub>2</sub> Cl <sub>2</sub>  | 17.74        | 216.98176 | 144.96063 | 174.95259 |
| Bupirimate                                | 41483-43-6  | C <sub>13</sub> H <sub>24</sub> N <sub>4</sub> O <sub>3</sub> S                | 17.78        | 208.14443 | 193.14477 | 273.10158 |
| Imazamethabenz-methyl                     | 81405-85-8  | C <sub>16</sub> H <sub>20</sub> N <sub>2</sub> O <sub>3</sub>                  | 17.81        | 144.04439 | 176.07060 | 245.09206 |
| Kresoxim-methyl                           | 143390-89-0 | C <sub>18</sub> H <sub>19</sub> NO <sub>4</sub>                                | 17.82        | 116.04947 | 131.07295 | 206.08116 |
| Metamitron                                | 41394-05-2  | C <sub>10</sub> H <sub>10</sub> N <sub>4</sub> O                               | 17.84        | 174.08999 | 173.08217 | 202.08491 |
| Isoxathion                                | 18854-01-8  | C <sub>13</sub> H <sub>16</sub> NO <sub>4</sub> PS                             | 17.96        | 177.02429 | 159.01372 | 313.05322 |
| Aramite                                   | 140-57-8    | C <sub>15</sub> H <sub>23</sub> O <sub>4</sub> SCl                             | 17.97        | 185.00325 | 175.11174 | 319.07654 |
| Nitrofen                                  | 1836-75-5   | C <sub>12</sub> H <sub>7</sub> Cl <sub>2</sub> NO <sub>3</sub>                 | 18.01        | 282.97975 | 284.97680 | 202.01799 |
| Endrin                                    | 72-20-8     | C <sub>12</sub> H <sub>8</sub> CL <sub>6</sub> O                               | 18.08        | 242.95295 | 280.92668 | 316.90336 |
| Endrin aldehyde                           | 7421-93-4   | C <sub>12</sub> H <sub>8</sub> OCl <sub>6</sub>                                | 18.08        | 242.95295 | 280.92668 | 344.89827 |
| Ancymidol                                 | 12771-68-5  | C <sub>15</sub> H <sub>16</sub> N <sub>2</sub> O <sub>2</sub>                  | 18.11        | 228.08933 | 107.02399 | 215.08150 |
| Perthan                                   | 72-56-0     | C <sub>18</sub> H <sub>20</sub> Cl <sub>2</sub>                                | 18.14        | 223.14812 | 178.07770 | 167.08552 |
| Chlorfenapyr                              | 122453-73-0 | C <sub>15</sub> H <sub>11</sub> BRCLF <sub>3</sub> N <sub>2</sub> O            | 18.18        | 247.04776 | 363.94073 | 361.94277 |
| Chloropropylate                           | 5836-10-2   | C <sub>17</sub> H <sub>16</sub> O <sub>3</sub> Cl <sub>2</sub>                 | 18.37        | 138.99451 | 110.99960 | 251.00249 |
| Chlorobenzilate                           | 510-15-6    | C <sub>16</sub> H <sub>14</sub> O <sub>3</sub> Cl <sub>2</sub>                 | 18.37        | 138.99450 | 251.00250 | 252.99960 |
| Fenthion sulfoxide                        | 3761-41-9   | C <sub>10</sub> H <sub>15</sub> O <sub>4</sub> PS <sub>2</sub>                 | 18.50        | 294.01439 | 278.99091 | 152.98272 |
| Diniconazole                              | 83657-24-3  | C <sub>15</sub> H <sub>17</sub> N <sub>3</sub> OCl <sub>2</sub>                | 18.54        | 268.00389 | 234.04287 | 165.01017 |
| Flamprop-isopropyl                        | 52756-22-6  | C <sub>19</sub> H <sub>19</sub> NO <sub>3</sub> FCl                            | 18.62        | 276.05860 | 105.03349 | 156.00108 |
| p,p'-Dichlorodiphenyldichloroetha         | 72-54-8     | C <sub>14</sub> H <sub>10</sub> Cl <sub>4</sub>                                | 18.65        | 235.00758 | 199.03090 | 165.06987 |

|                                    |             |                                                                               |              |           |           |           |  |
|------------------------------------|-------------|-------------------------------------------------------------------------------|--------------|-----------|-----------|-----------|--|
| ne                                 |             |                                                                               |              |           |           |           |  |
| Aclonifen                          | 74070-46-5  | C <sub>12</sub> H <sub>9</sub> CLN <sub>2</sub> O <sub>3</sub>                | 18.67        | 264.02962 | 182.06004 | 212.05802 |  |
| o,p'-Dichlorodiphenyltrichloroetha |             |                                                                               |              |           |           |           |  |
|                                    | 789-02-6    | C <sub>14</sub> H <sub>9</sub> Cl <sub>5</sub>                                | 18.75        | 235.00758 | 165.06987 | 237.00463 |  |
| ne                                 |             |                                                                               |              |           |           |           |  |
| Oxadixyl                           | 77732-09-3  | C <sub>14</sub> H <sub>18</sub> N <sub>2</sub> O <sub>4</sub>                 | 18.77        | 233.09207 | 163.09917 | 132.08078 |  |
| Ethion                             | 563-12-2    | C <sub>9</sub> H <sub>22</sub> O <sub>4</sub> P <sub>2</sub> S <sub>4</sub>   | 18.81        | 230.97315 | 202.94185 | 153.01336 |  |
| Mepronil                           | 55814-41-0  | C <sub>17</sub> H <sub>19</sub> NO <sub>2</sub>                               | 19.06        | 119.04914 | 210.06753 | 269.14103 |  |
| Triazophos                         | 24017-47-8  | C <sub>12</sub> H <sub>16</sub> N <sub>3</sub> O <sub>3</sub> PS              | 19.21        | 162.06619 | 257.00185 | 172.08692 |  |
| Azamethiphos                       | 35575-96-3  | C <sub>9</sub> H <sub>10</sub> ClN <sub>2</sub> O <sub>5</sub> PS             | 19.33        | 182.99558 | 214.96765 | 323.97311 |  |
| Ofurace                            | 58810-48-3  | C <sub>14</sub> H <sub>16</sub> NO <sub>3</sub> Cl                            | 19.38        | 232.09681 | 186.09134 | 281.08132 |  |
| Carbophenothion                    | 786-19-6    | C <sub>11</sub> H <sub>16</sub> O <sub>2</sub> PS <sub>3</sub> Cl             | 19.46        | 341.97331 | 170.96978 | 199.00108 |  |
| Benalaxyl                          | 71626-11-4  | C <sub>20</sub> H <sub>23</sub> NO <sub>3</sub>                               | 19.54        | 148.11207 | 176.10699 | 206.11755 |  |
| Tepraloxym                         | 149979-41-9 | C <sub>17</sub> H <sub>24</sub> NO <sub>4</sub> Cl                            | 19.54        | 164.07060 | 136.03930 | 108.04439 |  |
| Diofenolan                         | 63837-33-2  | C <sub>18</sub> H <sub>20</sub> O <sub>4</sub>                                | 19.55, 19.76 | 186.06753 | 131.04914 | 225.09100 |  |
| Cyanofenphos                       | 13067-93-1  | C <sub>15</sub> H <sub>14</sub> NO <sub>2</sub> PS                            | 19.59        | 141.00999 | 169.04129 | 185.01844 |  |
| Edifenphos                         | 17109-49-8  | C <sub>14</sub> H <sub>15</sub> O <sub>2</sub> PS <sub>2</sub>                | 19.60        | 172.98206 | 186.04977 | 310.02455 |  |
| Quinoxifen                         | 124495-18-7 | C <sub>15</sub> H <sub>8</sub> NOFCl <sub>2</sub>                             | 19.62        | 306.99615 | 237.05844 | 161.00268 |  |
| Endosulfan Sulfate                 | 1031-07-8   | C <sub>9</sub> H <sub>6</sub> CL <sub>6</sub> O <sub>4</sub> S                | 19.68        | 271.80962 | 236.84076 | 269.81257 |  |
| Propiconazol                       | 60207-90-1  | C <sub>15</sub> H <sub>17</sub> Cl <sub>2</sub> N <sub>3</sub> O <sub>2</sub> | 19.69, 19.90 | 172.95554 | 259.02871 | 261.02576 |  |
| Norflurazon                        | 27314-13-2  | C <sub>12</sub> H <sub>9</sub> N <sub>3</sub> OF <sub>3</sub> Cl              | 19.73        | 303.03807 | 173.03210 | 302.03025 |  |
| Fenhexamid                         | 126833-17-8 | C <sub>14</sub> H <sub>17</sub> Cl <sub>2</sub> NO <sub>2</sub>               | 19.78        | 176.97427 | 178.97132 | 301.06309 |  |
| p,p'-Dichlorodiphenyltrichloroetha |             |                                                                               |              |           |           |           |  |
|                                    | 50-29-3     | C <sub>14</sub> H <sub>9</sub> Cl <sub>5</sub>                                | 19.83        | 235.00758 | 199.0309  | 165.06987 |  |
| ne                                 |             |                                                                               |              |           |           |           |  |
| Trifloxystrobin                    | 141517-21-7 | C <sub>20</sub> H <sub>19</sub> F <sub>3</sub> N <sub>2</sub> O <sub>4</sub>  | 19.91        | 116.04947 | 190.04986 | 186.05251 |  |
| Hexazinone                         | 51235-04-2  | C <sub>12</sub> H <sub>20</sub> N <sub>4</sub> O <sub>2</sub>                 | 20.16        | 171.08765 | 71.06037  | 128.08183 |  |
| Tebuconazol                        | 107534-96-3 | C <sub>16</sub> H <sub>22</sub> ClN <sub>3</sub> O                            | 20.25        | 250.07417 | 125.01525 | 163.03090 |  |
| Chloridazon                        | 1698-60-8   | C <sub>10</sub> H <sub>8</sub> ClN <sub>3</sub> O                             | 20.25        | 220.02721 | 221.03504 | 222.02426 |  |
| Nuarimol                           | 63284-71-9  | C <sub>17</sub> H <sub>12</sub> N <sub>2</sub> OFCl                           | 20.26        | 235.03205 | 203.06152 | 314.06167 |  |
| Diclofop-methyl                    | 51338-27-3  | C <sub>16</sub> H <sub>14</sub> Cl <sub>2</sub> O <sub>4</sub>                | 20.38        | 340.02637 | 254.97881 | 252.98176 |  |
| Piperonyl butoxide                 | 51-03-6     | C <sub>19</sub> H <sub>30</sub> O <sub>5</sub>                                | 20.61        | 176.08318 | 161.0597  | 177.09100 |  |
| Oxycarboxin                        | 5259-88-1   | C <sub>12</sub> H <sub>13</sub> NO <sub>4</sub> S                             | 20.67        | 175.00595 | 250.02943 | 267.05597 |  |
| Resmethrin                         | 10453-86-8  | C <sub>22</sub> H <sub>26</sub> O <sub>3</sub>                                | 20.69        | 143.08552 | 128.06205 | 171.08044 |  |
| Zoxamide                           | 156052-68-5 | C <sub>14</sub> H <sub>16</sub> NO <sub>2</sub> Cl <sub>3</sub>               | 20.82        | 186.97120 | 258.04470 | 242.01340 |  |
| Mefenpyr-diethyl                   | 135590-91-9 | C <sub>16</sub> H <sub>18</sub> Cl <sub>2</sub> N <sub>2</sub> O <sub>4</sub> | 21.01        | 271.00355 | 227.01373 | 299.03485 |  |
| Benzoylprop-ethyl                  | 22212-55-1  | C <sub>18</sub> H <sub>17</sub> NO <sub>3</sub> Cl <sub>2</sub>               | 21.11        | 105.03349 | 292.02905 | 260.02396 |  |
| Spiromesifen                       | 283594-90-1 | C <sub>23</sub> H <sub>30</sub> O <sub>4</sub>                                | 21.13        | 254.13013 | 231.10033 | 226.13521 |  |
| Endrin ketone                      | 53494-70-5  | C <sub>12</sub> H <sub>8</sub> OC <sub>6</sub> Cl <sub>6</sub>                | 21.15        | 314.90632 | 281.93003 | 242.95295 |  |
| Fenamiphos sulfone                 | 31972-44-8  | C <sub>13</sub> H <sub>22</sub> NO <sub>5</sub> PS                            | 21.26        | 292.04030 | 320.07160 | 214.06244 |  |
| Bromuconazole                      | 116255-48-2 | C <sub>13</sub> H <sub>12</sub> BrCl <sub>2</sub> N <sub>3</sub> O            | 21.30, 22.11 | 172.95555 | 294.91096 | 174.95260 |  |
| Fenpiclonil                        | 74738-17-3  | C <sub>11</sub> H <sub>6</sub> N <sub>2</sub> Cl <sub>2</sub>                 | 21.31        | 235.99026 | 201.02140 | 237.98730 |  |
| Phosmet                            | 732-11-6    | C <sub>11</sub> H <sub>12</sub> NO <sub>4</sub> PS <sub>2</sub>               | 21.36        | 160.03930 | 104.02566 | 133.02871 |  |
| Bromopropylate                     | 18181-80-1  | C <sub>17</sub> H <sub>16</sub> O <sub>3</sub> Br <sub>2</sub>                | 21.47        | 184.94196 | 182.94400 | 338.90147 |  |
| Tetramethrin                       | 7696-12-0   | C <sub>19</sub> H <sub>25</sub> NO <sub>4</sub>                               | 21.60        | 164.07060 | 107.04914 | 123.11682 |  |
| Picolinafen                        | 137641-05-5 | C <sub>19</sub> H <sub>12</sub> N <sub>2</sub> O <sub>2</sub> F <sub>4</sub>  | 21.60        | 238.04742 | 145.02596 | 376.08294 |  |

|                      |             |                                                                                 |                               |           |           |           |
|----------------------|-------------|---------------------------------------------------------------------------------|-------------------------------|-----------|-----------|-----------|
| Bifenthrin           | 82657-04-3  | C <sub>23</sub> H <sub>22</sub> ClF <sub>3</sub> O <sub>2</sub>                 | 21.63                         | 181.10118 | 165.06988 | 182.10453 |
| Piperophos           | 24151-93-7  | C <sub>14</sub> H <sub>28</sub> NO <sub>3</sub> PS <sub>2</sub>                 | 21.67                         | 122.09642 | 140.10699 | 320.14437 |
| 4,4'-Methoxychlor    | 72-43-5     | C <sub>16</sub> H <sub>15</sub> O <sub>2</sub> CL <sub>3</sub>                  | 21.72                         | 227.10666 | 212.08318 | 228.11001 |
| Bifenazate           | 149877-41-8 | C <sub>17</sub> H <sub>20</sub> N <sub>2</sub> O <sub>3</sub>                   | 21.72                         | 300.14684 | 258.09989 | 196.07569 |
| Fenpropathrin        | 39515-41-8  | C <sub>22</sub> H <sub>23</sub> NO <sub>3</sub>                                 | 21.82                         | 181.06479 | 209.08350 | 265.07334 |
| Etoxazole            | 153233-91-1 | C <sub>21</sub> H <sub>23</sub> F <sub>2</sub> NO <sub>2</sub>                  | 21.90                         | 300.11945 | 187.11174 | 330.13001 |
| Tebufenpyrad         | 119168-77-3 | C <sub>18</sub> H <sub>24</sub> N <sub>3</sub> OCl                              | 21.93                         | 333.16024 | 171.03197 | 276.08982 |
| Fenamidone           | 161326-34-7 | C <sub>17</sub> H <sub>17</sub> N <sub>3</sub> OS                               | 21.94                         | 268.09029 | 206.07464 | 238.11006 |
| Dicofol              | 115-32-2    | C <sub>14</sub> H <sub>9</sub> CL <sub>5</sub> O                                | 21.97                         | 138.99452 | 199.03090 | 140.99157 |
| Metconazole          | 125116-23-6 | C <sub>17</sub> H <sub>22</sub> N <sub>3</sub> OCl                              | 21.98                         | 125.01525 | 145.06479 | 250.11189 |
| Fenazaquin           | 120928-09-8 | C <sub>20</sub> H <sub>22</sub> N <sub>2</sub> O                                | 22.00                         | 145.10118 | 117.06988 | 160.12465 |
| Tetradifon           | 116-29-0    | C <sub>12</sub> H <sub>6</sub> O <sub>2</sub> SCl <sub>4</sub>                  | 22.35                         | 226.88864 | 228.88569 | 158.96659 |
| Furathiocarb         | 65907-30-4  | C <sub>18</sub> H <sub>26</sub> N <sub>2</sub> O <sub>5</sub> S                 | 22.53                         | 163.07535 | 194.03960 | 325.13423 |
| Phosalone            | 2310-17-0   | C <sub>12</sub> H <sub>15</sub> NO <sub>4</sub> PS <sub>2</sub> Cl              | 22.67                         | 182.00033 | 121.04129 | 366.98631 |
| Pyriproxyfen         | 95737-68-1  | C <sub>20</sub> H <sub>19</sub> NO <sub>3</sub>                                 | 22.87                         | 136.07569 | 226.09883 | 137.07904 |
| Mirex                | 2385-85-5   | C <sub>10</sub> Cl <sub>12</sub>                                                | 22.95                         | 271.80962 | 269.81257 | 331.80962 |
| Mefenacet            | 73250-68-7  | C <sub>16</sub> H <sub>14</sub> N <sub>2</sub> O <sub>2</sub> S                 | 23.03                         | 192.01137 | 136.02154 | 120.08077 |
| Cyhalothrin          | 68085-85-8  | C <sub>23</sub> H <sub>19</sub> ClF <sub>3</sub> NO <sub>3</sub>                | 23.12, 23.48                  | 141.05103 | 197.03394 | 161.05726 |
| Tralkoxydim          | 87820-88-0  | C <sub>20</sub> H <sub>27</sub> NO <sub>3</sub>                                 | 23.16                         | 137.04712 | 227.13046 | 283.15668 |
| Fenarimol            | 60168-88-9  | C <sub>17</sub> H <sub>12</sub> N <sub>2</sub> OCl <sub>2</sub>                 | 23.57                         | 251.00250 | 219.03197 | 252.99955 |
| Trifenmorph          | 1420-06-0   | C <sub>23</sub> H <sub>23</sub> NO                                              | 23.64                         | 243.11682 | 228.09335 | 239.08552 |
| Azinphos-ethyl       | 2642-71-9   | C <sub>12</sub> H <sub>16</sub> N <sub>3</sub> O <sub>3</sub> PS <sub>2</sub>   | 23.84                         | 132.04439 | 104.04947 | 160.05053 |
| Pyrazophos           | 13457-18-6  | C <sub>14</sub> H <sub>20</sub> N <sub>3</sub> O <sub>3</sub> PS                | 23.87                         | 221.07949 | 265.08794 | 193.04819 |
| Acrinathrin          | 101007-06-1 | C <sub>26</sub> H <sub>21</sub> F <sub>6</sub> NO <sub>5</sub>                  | 23.89                         | 181.06479 | 208.07569 | 289.06593 |
| Fluoroglycofen-ethyl | 77501-90-7  | C <sub>18</sub> H <sub>13</sub> NO <sub>7</sub> F <sub>3</sub> Cl               | 23.95                         | 343.99205 | 223.03538 | 447.03271 |
| Fenoxaprop-ethyl     | 66441-23-4  | C <sub>18</sub> H <sub>16</sub> NO <sub>5</sub> Cl                              | 24.24                         | 288.04219 | 182.06004 | 361.07115 |
| Bitertanol           | 55179-31-2  | C <sub>20</sub> H <sub>23</sub> N <sub>3</sub> O <sub>2</sub>                   | 24.58                         | 170.07262 | 168.11314 | 171.07597 |
| Spirodiclofen        | 148477-71-8 | C <sub>21</sub> H <sub>24</sub> Cl <sub>2</sub> O <sub>4</sub>                  | 24.73                         | 259.05203 | 312.03145 | 156.96063 |
| Permethrin           | 61949-76-6  | C <sub>21</sub> H <sub>20</sub> CL <sub>2</sub> O <sub>3</sub>                  | 24.77, 25.02                  | 183.08044 | 163.00758 | 127.03090 |
| Pyridaben            | 96489-71-3  | C <sub>19</sub> H <sub>25</sub> ClN <sub>2</sub> OS                             | 24.95                         | 147.11682 | 117.06987 | 309.08228 |
| Fluquinconazole      | 136426-54-5 | C <sub>16</sub> H <sub>8</sub> N <sub>5</sub> OFCl <sub>2</sub>                 | 25.12                         | 340.03959 | 298.01779 | 286.01779 |
| Coumaphos            | 56-72-4     | C <sub>14</sub> H <sub>16</sub> ClO <sub>5</sub> PS                             | 25.15                         | 362.01391 | 210.00782 | 225.98498 |
| Prochloraz           | 67747-09-5  | C <sub>15</sub> H <sub>16</sub> N <sub>3</sub> O <sub>2</sub> Cl <sub>3</sub>   | 25.27                         | 180.11313 | 265.95368 | 308.00063 |
| Butafenacil          | 134605-64-4 | C <sub>20</sub> H <sub>18</sub> N <sub>2</sub> O <sub>6</sub> F <sub>3</sub> Cl | 25.62                         | 331.00918 | 123.99485 | 179.98468 |
| Prallethrin          | 23031-36-9  | C <sub>19</sub> H <sub>24</sub> O <sub>3</sub>                                  | 25.82                         | 123.11682 | 81.06987  | 105.06987 |
| Cyfluthrin           | 68359-37-5  | C <sub>22</sub> H <sub>18</sub> NO <sub>3</sub> FL <sub>2</sub>                 | 25.93, 26.12,<br>26.25, 26.34 | 206.06004 | 199.05536 | 163.00758 |
| Cypermethrin         | 52315-07-8  | C <sub>22</sub> H <sub>19</sub> Cl <sub>2</sub> NO <sub>3</sub>                 | 26.50, 26.70,<br>26.82, 26.92 | 181.06479 | 163.00758 | 127.03090 |
| Boscalid             | 188425-85-6 | C <sub>18</sub> H <sub>12</sub> Cl <sub>2</sub> N <sub>2</sub> O                | 26.52                         | 342.03212 | 111.99485 | 139.98977 |
| Quizalofop-ethyl     | 76578-14-8  | C <sub>19</sub> H <sub>17</sub> CLN <sub>2</sub> O <sub>4</sub>                 | 26.74                         | 372.08714 | 243.03196 | 163.00575 |
| Flucythrinate        | 70124-77-5  | C <sub>26</sub> H <sub>23</sub> F <sub>2</sub> NO <sub>4</sub>                  | 26.92, 27.29                  | 157.04595 | 199.09290 | 225.07843 |
| Etofenprox           | 80844-07-1  | C <sub>25</sub> H <sub>28</sub> O <sub>3</sub>                                  | 27.02                         | 163.11174 | 135.08044 | 164.11510 |
| Pyridalyl            | 179101-81-6 | C <sub>18</sub> H <sub>14</sub> NO <sub>3</sub> F <sub>3</sub> Cl <sub>4</sub>  | 27.17                         | 204.06307 | 148.03686 | 176.03177 |



|                 |             |                                                                                |              |           |           |           |
|-----------------|-------------|--------------------------------------------------------------------------------|--------------|-----------|-----------|-----------|
| Fenvalerate     | 51630-58-1  | C <sub>25</sub> H <sub>22</sub> NO <sub>3</sub> Cl                             | 28.20, 28.60 | 419.12830 | 125.01525 | 167.06220 |
| Flumioxazin     | 103361-09-7 | C <sub>19</sub> H <sub>15</sub> FN <sub>2</sub> O <sub>4</sub>                 | 28.24        | 354.10104 | 259.05135 | 326.10612 |
| Pyraclostrobin  | 175013-18-0 | C <sub>19</sub> H <sub>18</sub> N <sub>3</sub> O <sub>4</sub> Cl               | 28.33        | 132.04439 | 104.04947 | 164.07060 |
| tau-Fluvalinate | 102851-06-9 | C <sub>26</sub> H <sub>22</sub> ClF <sub>3</sub> N <sub>2</sub> O <sub>3</sub> | 28.61, 28.74 | 250.06049 | 252.05754 | 205.99789 |
| Difenoconazole  | 119446-68-3 | C <sub>19</sub> H <sub>17</sub> N <sub>3</sub> O <sub>3</sub> Cl <sub>2</sub>  | 28.94, 29.06 | 323.02363 | 266.97881 | 264.98176 |
| Deltamethrin    | 52918-63-5  | C <sub>22</sub> H <sub>19</sub> Br <sub>2</sub> NO <sub>3</sub>                | 29.20, 29.55 | 171.98821 | 173.98617 | 252.90450 |
| Azoxystrobin    | 131860-33-8 | C <sub>22</sub> H <sub>17</sub> N <sub>3</sub> O <sub>5</sub>                  | 30.01        | 344.10296 | 372.09788 | 388.09279 |
| Dimethomorph    | 110488-70-5 | C <sub>21</sub> H <sub>22</sub> ClNO <sub>4</sub>                              | 30.05        | 301.06260 | 303.05965 | 387.12319 |

**Table S2.** Matrixeffect (ME) obtained for the target compounds in the orange juice and celery juice matrix.

| Pesticides                        | orange juice    |                 |                 | celery juice    |                 |                 |
|-----------------------------------|-----------------|-----------------|-----------------|-----------------|-----------------|-----------------|
|                                   | ME <sup>a</sup> | ME <sup>b</sup> | ME <sup>c</sup> | ME <sup>a</sup> | ME <sup>b</sup> | ME <sup>c</sup> |
| Clopyralid                        | 1.53            | 1.53            | 1.51            | 1.35            | 1.21            | 1.13            |
| Dichlorvos                        | 1.26            | 1.02            | 1.04            | 1.10            | 1.74            | 1.09            |
| Methamidophos                     | 1.55            | 1.02            | 1.90            | 1.18            | 1.51            | 1.15            |
| Thiofanox                         | 1.13            | 1.19            | 1.96            | 1.25            | 1.55            | 1.37            |
| Allidochlor                       | 1.12            | 1.15            | 1.76            | 1.38            | 1.33            | 1.01            |
| Dichlobenil                       | 1.01            | 1.01            | 1.73            | 1.33            | 1.24            | 1.79            |
| EPTC                              | 1.20            | 1.03            | 1.61            | 1.07            | 1.25            | 1.59            |
| Dichlormid                        | 1.06            | 1.29            | 1.03            | 1.14            | 1.03            | 1.54            |
| 2,4,6-Trichlorophenol             | 1.51            | 1.38            | 1.87            | 1.48            | 1.36            | 1.84            |
| 3,5-Dichloroaniline               | 1.05            | 1.08            | 1.23            | 1.07            | 1.16            | 1.77            |
| O-Phthalimide                     | 1.33            | 1.29            | 1.86            | 1.11            | 1.39            | 1.02            |
| Mevinphos                         | 1.60            | 1.59            | 1.62            | 1.59            | 1.51            | 1.53            |
| Acephate                          | 1.04            | 1.41            | 1.36            | 1.43            | 1.71            | 1.39            |
| Vernolate                         | 1.41            | 1.32            | 1.34            | 1.44            | 1.50            | 1.54            |
| Propham                           | 1.24            | 1.42            | 1.91            | 1.39            | 1.17            | 1.18            |
| Etridiazole                       | 1.10            | 1.28            | 1.35            | 1.27            | 1.35            | 1.20            |
| Pebulate                          | 1.32            | 1.56            | 1.84            | 1.09            | 1.08            | 1.30            |
| cis-1,2,3,6-Tetrahydrophthalimide | 1.23            | 1.65            | 1.09            | 1.14            | 1.72            | 1.92            |
| Chloroneb                         | 1.25            | 1.48            | 1.87            | 1.42            | 1.19            | 1.27            |
| Tebuthiuron                       | 1.14            | 1.75            | 1.41            | 1.54            | 1.11            | 1.89            |
| Fenobucarb                        | 1.03            | 1.01            | 1.55            | 1.33            | 1.71            | 1.83            |

|                            |      |      |      |      |      |      |
|----------------------------|------|------|------|------|------|------|
| Pentachlorobenzene         | 1.10 | 1.18 | 1.64 | 1.45 | 1.50 | 1.35 |
| Isoproc carb               | 1.57 | 1.63 | 1.59 | 1.15 | 1.43 | 1.43 |
| Molinate                   | 1.44 | 1.44 | 1.16 | 1.48 | 1.65 | 1.78 |
| Heptenophos                | 1.40 | 1.33 | 1.78 | 1.17 | 1.51 | 1.75 |
| Chlorfenprop-methyl        | 1.49 | 1.08 | 1.26 | 1.31 | 1.63 | 1.14 |
| Omethoate                  | 1.33 | 1.72 | 1.05 | 1.21 | 1.23 | 1.36 |
| Propoxur                   | 1.13 | 1.34 | 1.55 | 1.59 | 1.15 | 1.58 |
| Tecnazene                  | 1.44 | 1.34 | 1.07 | 1.06 | 1.66 | 1.05 |
| Propachlor                 | 1.50 | 1.11 | 1.12 | 1.43 | 1.76 | 1.78 |
| Diphenylamine              | 1.03 | 1.11 | 1.93 | 1.32 | 1.05 | 1.29 |
| Ethoprophos                | 1.39 | 1.72 | 1.70 | 1.38 | 1.20 | 1.55 |
| Cycloate                   | 1.47 | 1.28 | 1.47 | 1.01 | 1.32 | 1.81 |
| 2,3,5,6-tetrachloroaniline | 1.21 | 1.08 | 1.32 | 1.46 | 1.26 | 1.01 |
| Atrazine-desethyl          | 1.18 | 1.36 | 1.77 | 1.08 | 1.16 | 1.63 |
| Dicrotophos                | 1.36 | 1.58 | 1.41 | 1.19 | 1.02 | 1.21 |
| Methabenzthiazuron         | 1.13 | 1.57 | 1.21 | 1.34 | 1.12 | 1.58 |
| Trifluralin                | 1.03 | 1.62 | 1.16 | 1.56 | 1.64 | 1.98 |
| Bendiocarb                 | 1.44 | 1.30 | 1.42 | 1.58 | 1.51 | 1.84 |
| Benfluralin                | 1.56 | 1.39 | 1.48 | 1.35 | 1.21 | 1.37 |
| Sulfotep                   | 1.00 | 1.07 | 1.65 | 1.50 | 1.32 | 1.30 |
| Cadusafos                  | 1.10 | 1.17 | 1.02 | 1.11 | 1.43 | 1.11 |
| Tebutam                    | 1.02 | 1.05 | 2.00 | 1.33 | 1.34 | 1.14 |
| Promecarb                  | 1.10 | 1.73 | 1.90 | 1.28 | 1.66 | 1.26 |
| Phorate                    | 1.56 | 1.43 | 1.58 | 1.41 | 1.27 | 1.31 |
| Atratone                   | 1.07 | 1.45 | 1.40 | 1.40 | 1.36 | 1.12 |

|                                 |      |      |      |      |      |      |
|---------------------------------|------|------|------|------|------|------|
| 3,4,5-Trimethacarb              | 1.06 | 1.14 | 1.01 | 1.10 | 1.34 | 1.76 |
| Dicloran                        | 1.14 | 1.23 | 1.57 | 1.37 | 1.06 | 1.47 |
| Pentachloroanisole              | 1.46 | 1.51 | 1.93 | 1.03 | 1.40 | 1.19 |
| Ethoxyquin                      | 1.52 | 1.71 | 1.16 | 1.17 | 1.33 | 1.42 |
| Prometon                        | 1.14 | 1.58 | 1.96 | 1.45 | 1.25 | 1.57 |
| Atrazine                        | 1.12 | 1.35 | 1.61 | 1.24 | 1.31 | 1.37 |
| Monolinuron                     | 1.40 | 1.17 | 1.05 | 1.14 | 1.65 | 1.86 |
| Propazine                       | 1.14 | 1.29 | 1.56 | 1.41 | 1.52 | 1.57 |
| Clomazone                       | 1.11 | 1.35 | 1.76 | 1.33 | 1.09 | 1.78 |
| $\alpha$ -Hexachlorocyclohexane | 1.35 | 1.34 | 1.03 | 1.47 | 1.14 | 1.72 |
| Terbumeton                      | 1.29 | 1.59 | 1.43 | 1.52 | 1.62 | 1.61 |
| $\beta$ -Hexachlorocyclohexane  | 1.55 | 1.57 | 1.23 | 1.06 | 1.23 | 1.64 |
| Aminocarb                       | 1.22 | 1.41 | 1.34 | 1.41 | 1.07 | 1.42 |
| Isocarbamid                     | 1.25 | 1.22 | 1.80 | 1.58 | 1.46 | 1.28 |
| Cyromazine                      | 1.52 | 1.73 | 1.93 | 1.43 | 1.36 | 1.60 |
| $\gamma$ -Hexachlorocyclohexane | 1.47 | 1.73 | 1.90 | 1.16 | 1.27 | 1.48 |
| Propetamphos                    | 1.43 | 1.16 | 1.75 | 1.12 | 1.51 | 1.24 |
| Cycluron                        | 1.11 | 1.62 | 1.06 | 1.28 | 1.67 | 1.19 |
| Terbutylazine                   | 1.51 | 1.24 | 1.07 | 1.53 | 1.71 | 1.59 |
| Terbufos                        | 1.13 | 1.08 | 1.16 | 1.42 | 1.29 | 1.86 |
| Cyanophos                       | 1.52 | 1.10 | 1.13 | 1.22 | 1.74 | 1.53 |
| Trietazine                      | 1.49 | 1.66 | 1.99 | 1.27 | 1.03 | 1.13 |
| Quintozene                      | 1.51 | 1.25 | 1.98 | 1.05 | 1.01 | 1.04 |
| Fonofos                         | 1.52 | 1.12 | 1.99 | 1.26 | 1.40 | 1.76 |
| Pyroquilon                      | 1.43 | 1.79 | 1.91 | 1.04 | 1.57 | 1.51 |

|                         |      |      |      |      |      |      |
|-------------------------|------|------|------|------|------|------|
| Dinoterb                | 1.06 | 1.54 | 1.41 | 1.19 | 1.66 | 1.10 |
| Pyrimethanil            | 1.09 | 1.49 | 1.46 | 1.17 | 1.50 | 1.05 |
| Diazinon                | 1.25 | 1.73 | 1.84 | 1.04 | 1.57 | 1.87 |
| Flufenoxuron            | 1.19 | 1.28 | 1.46 | 1.45 | 1.48 | 1.09 |
| Disulfoton              | 1.16 | 1.66 | 1.09 | 1.29 | 1.58 | 1.63 |
| Paraoxon-methyl         | 1.05 | 1.78 | 1.69 | 1.01 | 1.00 | 1.51 |
| Secbumeton              | 1.28 | 1.78 | 1.17 | 1.05 | 1.57 | 1.52 |
| Aziprotryne             | 1.55 | 1.48 | 1.47 | 1.02 | 1.55 | 1.62 |
| Dinitramine             | 1.32 | 1.11 | 1.39 | 1.12 | 1.69 | 1.05 |
| Fenfuram                | 1.37 | 1.15 | 1.60 | 1.34 | 1.44 | 1.64 |
| δ-Hexachlorocyclohexane | 1.47 | 1.44 | 1.98 | 1.57 | 1.09 | 1.48 |
| Mexacarbate             | 1.34 | 1.74 | 1.71 | 1.44 | 1.61 | 1.14 |
| Isazofos                | 1.22 | 1.05 | 1.06 | 1.16 | 1.04 | 1.45 |
| Chlorothalonil          | 1.26 | 1.76 | 1.91 | 1.50 | 1.49 | 1.84 |
| Triallate               | 1.29 | 1.27 | 1.70 | 1.05 | 1.37 | 1.94 |
| Tebupirimfos            | 1.42 | 1.22 | 1.42 | 1.27 | 1.73 | 1.48 |
| musk ambrette           | 1.03 | 1.49 | 1.58 | 1.54 | 1.00 | 1.52 |
| Oxabetrinil             | 1.24 | 1.49 | 1.53 | 1.58 | 1.14 | 1.43 |
| Iprobenfos              | 1.44 | 1.17 | 1.88 | 1.23 | 1.54 | 1.16 |
| Fluroxypyr              | 1.56 | 1.69 | 1.48 | 1.25 | 1.22 | 1.97 |
| Pirimicarb              | 1.51 | 1.47 | 1.02 | 1.02 | 1.08 | 1.76 |
| Monalide                | 1.41 | 1.04 | 1.87 | 1.30 | 1.68 | 1.43 |
| Furmecyclox             | 1.56 | 1.23 | 1.97 | 1.32 | 1.16 | 1.94 |
| Benoxacor               | 1.16 | 1.16 | 1.73 | 1.18 | 1.39 | 1.60 |
| Pentachloroaniline      | 1.31 | 1.35 | 1.90 | 1.30 | 1.54 | 1.40 |

|                     |      |      |      |      |      |      |
|---------------------|------|------|------|------|------|------|
| Benfuresate         | 1.33 | 1.57 | 1.16 | 1.22 | 1.64 | 1.40 |
| Dioxacarb           | 1.42 | 1.65 | 1.54 | 1.55 | 1.39 | 1.35 |
| Cyprazine           | 1.04 | 1.01 | 1.69 | 1.47 | 1.10 | 1.77 |
| Phosphamidon        | 1.29 | 1.36 | 1.77 | 1.49 | 1.67 | 1.74 |
| Dichlorprop         | 1.31 | 1.25 | 1.77 | 1.35 | 1.53 | 1.85 |
| Dichlofenthion      | 1.45 | 1.47 | 1.77 | 1.54 | 1.46 | 1.56 |
| Fenthion            | 1.60 | 1.59 | 1.33 | 1.48 | 1.10 | 1.08 |
| Propanil            | 1.19 | 1.49 | 1.15 | 1.38 | 1.44 | 1.96 |
| 2,4-DB              | 1.58 | 1.63 | 1.03 | 1.42 | 1.06 | 1.02 |
| Chlorthiamid        | 1.12 | 1.14 | 1.11 | 1.10 | 1.53 | 1.90 |
| Dimethachlor        | 1.36 | 1.25 | 1.57 | 1.02 | 1.48 | 1.33 |
| Metribuzin          | 1.37 | 1.78 | 1.65 | 1.43 | 1.65 | 1.25 |
| Dimethenamid        | 1.44 | 1.20 | 1.45 | 1.12 | 1.06 | 1.68 |
| Bromobutide         | 1.51 | 1.63 | 1.74 | 1.57 | 1.01 | 1.20 |
| Terbucarb           | 1.42 | 1.60 | 1.70 | 1.29 | 1.04 | 1.53 |
| Malaoxon            | 1.45 | 1.21 | 1.30 | 1.26 | 1.13 | 1.28 |
| Vinclozolin         | 1.06 | 1.23 | 1.76 | 1.25 | 1.74 | 1.14 |
| Parathion-methyl    | 1.44 | 1.04 | 1.49 | 1.09 | 1.32 | 1.46 |
| Chlorpyrifos-methyl | 1.46 | 1.25 | 1.36 | 1.31 | 1.39 | 1.38 |
| Transfluthrin       | 1.52 | 1.38 | 1.36 | 1.08 | 1.13 | 1.71 |
| Simetryn            | 1.21 | 1.18 | 1.18 | 1.11 | 1.50 | 1.63 |
| Fuberidazole        | 1.44 | 1.15 | 1.06 | 1.52 | 1.23 | 1.68 |
| Tolclofos-methyl    | 1.19 | 1.78 | 1.33 | 1.37 | 1.23 | 1.69 |
| Alachlor            | 1.49 | 1.60 | 1.14 | 1.35 | 1.74 | 1.59 |
| Ametryn             | 1.39 | 1.47 | 1.32 | 1.01 | 1.57 | 1.19 |

|                          |      |      |      |      |      |      |
|--------------------------|------|------|------|------|------|------|
| Heptachlor               | 1.09 | 1.16 | 1.14 | 1.54 | 1.78 | 1.36 |
| Prometryn                | 1.08 | 1.30 | 1.71 | 1.16 | 1.37 | 1.66 |
| Acetochlor               | 1.19 | 1.06 | 1.22 | 1.39 | 1.61 | 1.27 |
| Paraoxon-ethyl           | 1.13 | 1.57 | 1.52 | 1.43 | 1.64 | 1.93 |
| Metalaxyl                | 1.24 | 1.53 | 1.24 | 1.11 | 1.59 | 1.24 |
| Tridiphane               | 1.53 | 1.14 | 1.22 | 1.43 | 1.73 | 1.16 |
| Octachlorodipropyl ether | 1.51 | 1.77 | 1.34 | 1.06 | 1.33 | 1.33 |
| Prosulfocarb             | 1.40 | 1.73 | 1.42 | 1.05 | 1.21 | 1.96 |
| Fenpropidin              | 1.32 | 1.53 | 1.60 | 1.52 | 1.38 | 1.30 |
| 1-Naphthylacetamide      | 1.03 | 1.67 | 1.17 | 1.48 | 1.68 | 1.37 |
| Dithiopyr                | 1.30 | 1.57 | 1.58 | 1.56 | 1.61 | 1.06 |
| Orbencarb                | 1.56 | 1.27 | 1.24 | 1.52 | 1.02 | 1.69 |
| Terbutryn                | 1.21 | 1.50 | 1.53 | 1.49 | 1.37 | 1.72 |
| Spiroxamine              | 1.34 | 1.10 | 1.51 | 1.10 | 1.44 | 1.71 |
| Methiocarb               | 1.36 | 1.34 | 1.63 | 1.53 | 1.17 | 1.12 |
| Fenitrothion             | 1.24 | 1.35 | 1.30 | 1.20 | 1.71 | 1.84 |
| Pirimiphos-methyl        | 1.09 | 1.13 | 1.20 | 1.20 | 1.40 | 1.62 |
| Methiocarb sulfone       | 1.05 | 1.55 | 1.43 | 1.09 | 1.74 | 1.13 |
| Ethofumesate             | 1.57 | 1.30 | 1.51 | 1.60 | 1.37 | 1.61 |
| Linuron                  | 1.38 | 1.45 | 1.06 | 1.56 | 1.29 | 1.65 |
| Probenazole              | 1.03 | 1.49 | 1.64 | 1.45 | 1.50 | 1.21 |
| Noruron                  | 1.22 | 1.77 | 1.79 | 1.03 | 1.55 | 1.74 |
| Quinoclamine             | 1.02 | 1.44 | 1.73 | 1.25 | 1.67 | 1.99 |
| Dipropetryn              | 1.27 | 1.16 | 1.42 | 1.30 | 1.69 | 1.45 |
| Malathion                | 1.19 | 1.40 | 1.18 | 1.48 | 1.80 | 1.67 |

|                           |      |      |      |      |      |      |
|---------------------------|------|------|------|------|------|------|
| Thiobencarb               | 1.50 | 1.21 | 1.96 | 1.56 | 1.32 | 1.57 |
| Diethofencarb             | 1.40 | 1.19 | 1.77 | 1.51 | 1.77 | 1.20 |
| Phorate sulfoxide         | 1.21 | 1.13 | 1.39 | 1.57 | 1.68 | 1.44 |
| Metolachlor               | 1.26 | 1.47 | 1.64 | 1.34 | 1.75 | 1.21 |
| Fenpropimorph             | 1.21 | 1.36 | 1.27 | 1.52 | 1.26 | 1.97 |
| Cyanazine                 | 1.11 | 1.24 | 1.70 | 1.22 | 1.54 | 1.40 |
| Chlorpyrifos              | 1.10 | 1.15 | 1.63 | 1.12 | 1.26 | 1.37 |
| Parathion                 | 1.39 | 1.58 | 1.19 | 1.16 | 1.54 | 1.78 |
| Flufenacet                | 1.23 | 1.20 | 1.67 | 1.05 | 1.68 | 1.25 |
| Rabenzazol                | 1.13 | 1.67 | 1.40 | 1.45 | 1.23 | 1.46 |
| 4,4'-Dichlorobenzophenone | 1.23 | 1.19 | 1.84 | 1.31 | 1.46 | 1.76 |
| Triadimefon               | 1.59 | 1.49 | 1.40 | 1.08 | 1.38 | 1.17 |
| Chlorthal-dimethyl        | 1.25 | 1.03 | 1.38 | 1.20 | 1.00 | 1.59 |
| Dicapthon                 | 1.52 | 1.15 | 1.07 | 1.46 | 1.57 | 1.74 |
| Isofenphos-oxon           | 1.15 | 1.48 | 1.46 | 1.03 | 1.42 | 1.91 |
| Isocarbophos              | 1.10 | 1.06 | 1.45 | 1.51 | 1.78 | 1.33 |
| Tetraconazole             | 1.03 | 1.12 | 1.46 | 1.05 | 1.40 | 1.60 |
| Isobenzan                 | 1.19 | 1.50 | 1.28 | 1.27 | 1.34 | 1.13 |
| Flurochloridone           | 1.40 | 1.13 | 1.40 | 1.50 | 1.10 | 1.64 |
| Fenson                    | 1.16 | 1.61 | 1.28 | 1.49 | 1.29 | 1.57 |
| Pyracarbolid              | 1.29 | 1.20 | 1.75 | 1.05 | 1.74 | 1.43 |
| Dodemorph                 | 1.35 | 1.20 | 1.14 | 1.20 | 1.20 | 1.41 |
| Mgk 264                   | 1.42 | 1.42 | 1.73 | 1.59 | 1.31 | 1.31 |
| Butralin                  | 1.55 | 1.35 | 1.74 | 1.09 | 1.75 | 1.23 |
| Carbaryl                  | 1.13 | 1.47 | 1.21 | 1.04 | 1.19 | 1.75 |



|                    |      |      |      |      |      |      |
|--------------------|------|------|------|------|------|------|
| Diphenamid         | 1.48 | 1.29 | 1.59 | 1.53 | 1.61 | 1.47 |
| Pirimiphos-ethyl   | 1.13 | 1.14 | 1.99 | 1.43 | 1.31 | 1.07 |
| Isodrin            | 1.40 | 1.51 | 1.49 | 1.09 | 1.56 | 1.66 |
| Aldrin             | 1.25 | 1.03 | 1.04 | 1.45 | 1.21 | 1.05 |
| Isopropalin        | 1.58 | 1.09 | 1.71 | 1.18 | 1.14 | 1.07 |
| Cyprodinil         | 1.06 | 1.09 | 1.98 | 1.43 | 1.06 | 1.63 |
| Isofenphos-methyl  | 1.55 | 1.01 | 1.52 | 1.23 | 1.19 | 1.76 |
| Octachlorostyrene  | 1.57 | 1.77 | 1.38 | 1.55 | 1.01 | 1.14 |
| Metazachlor        | 1.13 | 1.01 | 1.08 | 1.14 | 1.01 | 1.90 |
| Dimethametryn      | 1.01 | 1.21 | 1.40 | 1.43 | 1.27 | 1.73 |
| Pendimethalin      | 1.07 | 1.46 | 1.97 | 1.56 | 1.60 | 1.74 |
| Disulfoton-sulfone | 1.45 | 1.64 | 1.61 | 1.15 | 1.09 | 1.31 |
| Phorate sulfone    | 1.16 | 1.34 | 1.32 | 1.52 | 1.12 | 1.72 |
| Terbufos sulfone   | 1.42 | 1.01 | 1.19 | 1.50 | 1.72 | 1.58 |
| Paclobutrazol      | 1.15 | 1.69 | 1.44 | 1.34 | 1.17 | 1.47 |
| Penconazole        | 1.01 | 1.80 | 1.08 | 1.30 | 1.27 | 1.72 |
| Chlozolate         | 1.01 | 1.25 | 1.62 | 1.59 | 1.29 | 1.45 |
| Pyrifeno           | 1.17 | 1.14 | 1.46 | 1.07 | 1.21 | 1.15 |
| Tolylfluorid       | 1.54 | 1.44 | 1.25 | 1.51 | 1.21 | 1.04 |
| Fosthiazate        | 1.29 | 1.28 | 1.78 | 1.39 | 1.44 | 1.75 |
| Phosfolan          | 1.10 | 1.34 | 1.54 | 1.39 | 1.01 | 1.27 |
| Allethrin          | 1.45 | 1.30 | 1.51 | 1.23 | 1.55 | 1.01 |
| Isofenphos         | 1.53 | 1.14 | 1.97 | 1.17 | 1.02 | 1.47 |
| Captan             | 1.03 | 1.53 | 1.03 | 1.19 | 1.41 | 1.01 |
| Fipronil           | 1.05 | 1.47 | 1.76 | 1.24 | 1.00 | 1.33 |

|                      |      |      |      |      |      |      |
|----------------------|------|------|------|------|------|------|
| Diclocymet           | 1.22 | 1.17 | 1.51 | 1.51 | 1.51 | 1.34 |
| Quinalphos           | 1.23 | 1.58 | 1.63 | 1.37 | 1.36 | 1.05 |
| Phenthoate           | 1.49 | 1.58 | 1.11 | 1.07 | 1.04 | 1.88 |
| Triadimenol          | 1.50 | 1.17 | 1.81 | 1.53 | 1.36 | 1.12 |
| Dinobuton            | 1.45 | 1.62 | 1.37 | 1.11 | 1.32 | 1.29 |
| Furalaxyl            | 1.41 | 1.65 | 1.00 | 1.32 | 1.11 | 1.32 |
| Crotoxyphos          | 1.16 | 1.16 | 1.98 | 1.30 | 1.39 | 1.37 |
| Procymidone          | 1.11 | 1.05 | 1.08 | 1.40 | 1.18 | 1.10 |
| Chlorbenside         | 1.07 | 1.70 | 1.74 | 1.37 | 1.65 | 1.23 |
| Chlorflurenol-methyl | 1.47 | 1.43 | 1.52 | 1.26 | 1.27 | 1.57 |
| Chlordane            | 1.49 | 1.02 | 1.19 | 1.21 | 1.62 | 1.37 |
| Methidathion         | 1.45 | 1.42 | 1.54 | 1.14 | 1.10 | 1.52 |
| Haloxypop-methyl     | 1.07 | 1.50 | 1.36 | 1.52 | 1.35 | 1.23 |
| Bromophos-ethyl      | 1.07 | 1.71 | 1.33 | 1.03 | 1.69 | 1.37 |
| Procyazine           | 1.14 | 1.14 | 1.15 | 1.53 | 1.78 | 1.48 |
| Disulfoton-sulfoxide | 1.18 | 1.01 | 1.41 | 1.18 | 1.08 | 1.99 |
| Tetrachlorvinphos    | 1.48 | 1.58 | 1.40 | 1.27 | 1.27 | 1.37 |
| Endosulfan           | 1.20 | 1.29 | 1.36 | 1.07 | 1.42 | 1.13 |
| Mepanipirim          | 1.16 | 1.76 | 1.26 | 1.24 | 1.05 | 1.92 |
| Butachlor            | 1.01 | 1.61 | 1.29 | 1.47 | 1.02 | 1.25 |
| Ditalimfos           | 1.46 | 1.41 | 1.05 | 1.38 | 1.25 | 1.75 |
| TCMTB                | 1.12 | 1.15 | 1.36 | 1.07 | 1.03 | 1.44 |
| trans-Nonachlor      | 1.32 | 1.48 | 1.19 | 1.36 | 1.07 | 1.01 |
| Chlorfenson          | 1.40 | 1.67 | 1.07 | 1.16 | 1.64 | 1.81 |
| Fenamiphos           | 1.22 | 1.60 | 1.20 | 1.17 | 1.66 | 1.27 |

|                                       |      |      |      |      |      |      |
|---------------------------------------|------|------|------|------|------|------|
| Picoxystrobin                         | 1.20 | 1.68 | 1.47 | 1.37 | 1.71 | 1.41 |
| Napropamide                           | 1.19 | 1.50 | 1.26 | 1.35 | 1.17 | 1.57 |
| Hexaconazole                          | 1.14 | 1.80 | 1.16 | 1.18 | 1.57 | 1.84 |
| Flutolanil                            | 1.05 | 1.51 | 1.03 | 1.43 | 1.79 | 1.38 |
| Prothiophos                           | 1.44 | 1.28 | 1.01 | 1.01 | 1.52 | 1.55 |
| Isoprothiolane                        | 1.44 | 1.19 | 1.06 | 1.17 | 1.76 | 1.82 |
| Profenofos                            | 1.54 | 1.18 | 1.69 | 1.58 | 1.43 | 1.46 |
| tricyclazole                          | 1.43 | 1.73 | 1.35 | 1.59 | 1.12 | 1.94 |
| Pretilachlor                          | 1.13 | 1.35 | 1.25 | 1.20 | 1.69 | 1.22 |
| Dieldrin                              | 1.04 | 1.79 | 1.61 | 1.41 | 1.41 | 1.07 |
| Oxadiazon                             | 1.59 | 1.59 | 1.72 | 1.49 | 1.69 | 1.47 |
| Iprovalicarb                          | 1.03 | 1.01 | 1.08 | 1.26 | 1.73 | 1.28 |
| Carboxin                              | 1.46 | 1.36 | 1.50 | 1.21 | 1.33 | 1.46 |
| Myclobutanil                          | 1.53 | 1.56 | 1.55 | 1.38 | 1.38 | 1.98 |
| p,p'-Dichlorodiphenyldichloroethylene | 1.16 | 1.22 | 1.68 | 1.41 | 1.50 | 1.64 |
| Buprofezin                            | 1.13 | 1.14 | 1.39 | 1.33 | 1.70 | 1.32 |
| Imazalil                              | 1.50 | 1.78 | 1.69 | 1.25 | 1.46 | 1.61 |
| Flusilazole                           | 1.34 | 1.49 | 1.20 | 1.16 | 1.15 | 1.23 |
| Methoprotryne                         | 1.30 | 1.34 | 1.12 | 1.17 | 1.54 | 1.12 |
| Azaconazole                           | 1.43 | 1.36 | 1.61 | 1.48 | 1.60 | 1.17 |
| Bupirimate                            | 1.40 | 1.15 | 1.92 | 1.43 | 1.48 | 1.48 |
| Imazamethabenz-methyl                 | 1.54 | 1.66 | 1.89 | 1.58 | 1.61 | 1.96 |
| Kresoxim-methyl                       | 1.46 | 1.10 | 1.01 | 1.02 | 1.55 | 1.51 |
| Metamitron                            | 1.00 | 1.02 | 1.06 | 1.24 | 1.25 | 1.22 |
| Isoxathion                            | 1.57 | 1.53 | 1.29 | 1.40 | 1.39 | 1.60 |

|                                      |      |      |      |      |      |      |
|--------------------------------------|------|------|------|------|------|------|
| Aramite                              | 1.21 | 1.09 | 1.43 | 1.54 | 1.63 | 1.96 |
| Nitrofen                             | 1.04 | 1.67 | 1.35 | 1.11 | 1.79 | 1.38 |
| Endrin                               | 1.37 | 1.36 | 1.91 | 1.47 | 1.02 | 1.23 |
| Endrin aldehyde                      | 1.32 | 1.78 | 1.26 | 1.12 | 1.01 | 1.83 |
| Ancymidol                            | 1.05 | 1.27 | 1.70 | 1.57 | 1.08 | 1.07 |
| Perthan                              | 1.42 | 1.47 | 1.36 | 1.03 | 1.05 | 1.64 |
| Chlorfenapyr                         | 1.02 | 1.74 | 1.53 | 1.04 | 1.59 | 1.63 |
| Chloropropylate                      | 1.22 | 1.52 | 1.12 | 1.19 | 1.54 | 1.37 |
| Chlorobenzilate                      | 1.41 | 1.08 | 1.11 | 1.16 | 1.21 | 1.53 |
| Fenthion sulfoxide                   | 1.39 | 1.11 | 1.42 | 1.49 | 1.16 | 1.46 |
| Diniconazole                         | 1.53 | 1.67 | 1.15 | 1.07 | 1.43 | 1.31 |
| Flamprop-isopropyl                   | 1.39 | 1.27 | 1.84 | 1.39 | 1.64 | 1.23 |
| p,p'-Dichlorodiphenyldichloroethane  | 1.54 | 1.26 | 1.89 | 1.56 | 1.15 | 1.08 |
| Aclonifen                            | 1.03 | 1.33 | 1.22 | 1.45 | 1.06 | 1.41 |
| o,p'-Dichlorodiphenyltrichloroethane | 1.34 | 1.42 | 1.78 | 1.14 | 1.73 | 1.79 |
| Oxadixyl                             | 1.26 | 1.30 | 1.85 | 1.22 | 1.52 | 1.82 |
| Ethion                               | 1.40 | 1.73 | 1.97 | 1.16 | 1.04 | 1.46 |
| Mepronil                             | 1.39 | 1.02 | 1.85 | 1.17 | 1.53 | 1.33 |
| Triazophos                           | 1.17 | 1.48 | 1.03 | 1.22 | 1.06 | 1.47 |
| Azamethiphos                         | 1.12 | 1.70 | 1.31 | 1.48 | 1.56 | 1.64 |
| Ofurace                              | 1.56 | 1.41 | 1.46 | 1.01 | 1.05 | 1.34 |
| Carbophenothion                      | 1.21 | 1.29 | 1.08 | 1.30 | 1.06 | 1.49 |
| Benalaxyl                            | 1.49 | 1.25 | 1.54 | 1.00 | 1.16 | 1.39 |
| Tepraloxydim                         | 1.38 | 1.03 | 1.92 | 1.27 | 1.79 | 1.13 |
| Diofenolan                           | 1.00 | 1.01 | 1.55 | 1.08 | 1.54 | 1.91 |

|                                      |      |      |      |      |      |      |
|--------------------------------------|------|------|------|------|------|------|
| Cyanofenphos                         | 1.13 | 1.75 | 1.51 | 1.20 | 1.56 | 1.73 |
| Edifenphos                           | 1.50 | 1.22 | 1.65 | 1.57 | 1.71 | 1.62 |
| Quinoxifen                           | 1.02 | 1.12 | 1.08 | 1.54 | 1.74 | 1.99 |
| Endosulfan Sulfate                   | 1.29 | 1.11 | 1.99 | 1.50 | 1.10 | 1.87 |
| Propiconazol                         | 1.39 | 1.50 | 1.62 | 1.48 | 1.17 | 1.68 |
| Norflurazon                          | 1.27 | 1.05 | 1.88 | 1.43 | 1.50 | 1.02 |
| Fenhexamid                           | 1.35 | 1.36 | 1.26 | 1.55 | 1.76 | 1.49 |
| p,p'-Dichlorodiphenyltrichloroethane | 1.15 | 1.79 | 1.28 | 1.50 | 1.29 | 1.25 |
| Trifloxystrobin                      | 1.02 | 1.05 | 1.94 | 1.25 | 1.30 | 1.26 |
| Hexazinone                           | 1.54 | 1.66 | 1.00 | 1.00 | 1.21 | 1.54 |
| Tebuconazol                          | 1.18 | 1.04 | 1.49 | 1.55 | 1.05 | 1.01 |
| Chloridazon                          | 1.05 | 1.80 | 1.25 | 1.22 | 1.14 | 1.86 |
| Nuarimol                             | 1.28 | 1.78 | 1.36 | 1.31 | 1.24 | 1.70 |
| Diclofop-methyl                      | 1.55 | 1.69 | 1.99 | 1.05 | 1.59 | 1.08 |
| Piperonyl butoxide                   | 1.09 | 1.49 | 1.53 | 1.11 | 1.22 | 1.16 |
| Oxycarboxin                          | 1.03 | 1.44 | 1.88 | 1.23 | 1.24 | 1.88 |
| Resmethrin                           | 1.50 | 1.41 | 1.59 | 1.40 | 1.18 | 1.18 |
| Zoxamide                             | 1.13 | 1.65 | 1.35 | 1.48 | 1.49 | 1.90 |
| Mefenpyr-diethyl                     | 1.11 | 1.74 | 1.84 | 1.44 | 1.30 | 1.32 |
| Benzoylprop-ethyl                    | 1.39 | 1.41 | 1.91 | 1.13 | 1.37 | 1.80 |
| Spiromesifen                         | 1.45 | 1.14 | 1.48 | 1.20 | 1.18 | 1.06 |
| Endrin ketone                        | 1.14 | 1.65 | 1.64 | 1.10 | 1.09 | 1.43 |
| Fenamiphos sulfone                   | 1.58 | 1.76 | 1.11 | 1.38 | 1.47 | 1.28 |
| Bromuconazole                        | 1.56 | 1.18 | 1.88 | 1.32 | 1.64 | 1.45 |
| Fenpiclonil                          | 1.00 | 1.04 | 1.20 | 1.57 | 1.53 | 1.79 |

|                   |      |      |      |      |      |      |
|-------------------|------|------|------|------|------|------|
| Phosmet           | 1.20 | 1.55 | 1.33 | 1.22 | 1.09 | 1.69 |
| Bromopropylate    | 1.00 | 1.24 | 1.84 | 1.38 | 1.51 | 1.16 |
| Tetramethrin      | 1.46 | 1.63 | 1.37 | 1.43 | 1.58 | 1.64 |
| Picolinafen       | 1.02 | 1.20 | 1.06 | 1.21 | 1.43 | 1.23 |
| Bifenthrin        | 1.27 | 1.62 | 1.56 | 1.45 | 1.33 | 1.79 |
| Piperophos        | 1.23 | 1.70 | 1.25 | 1.41 | 1.07 | 1.99 |
| 4,4'-Methoxychlor | 1.01 | 1.50 | 1.57 | 1.52 | 1.79 | 1.83 |
| Bifenazate        | 1.07 | 1.33 | 1.34 | 1.02 | 1.24 | 1.17 |
| Fenpropathrin     | 1.50 | 1.65 | 1.77 | 1.48 | 1.44 | 1.68 |
| Etoxazole         | 1.04 | 1.48 | 1.92 | 1.31 | 1.44 | 1.00 |
| Tebuufenpyrad     | 1.09 | 1.05 | 1.66 | 1.13 | 1.29 | 1.11 |
| Fenamidone        | 1.56 | 1.19 | 1.19 | 1.21 | 1.70 | 1.64 |
| Dicofol           | 1.48 | 1.58 | 1.31 | 1.20 | 1.23 | 1.87 |
| Metconazole       | 1.47 | 1.33 | 1.07 | 1.23 | 1.27 | 1.59 |
| Fenazaquin        | 1.09 | 1.04 | 1.67 | 1.11 | 1.17 | 1.65 |
| Tetradifon        | 1.58 | 1.80 | 1.03 | 1.59 | 1.72 | 1.02 |
| Furathiocarb      | 1.10 | 1.62 | 1.18 | 1.17 | 1.18 | 1.83 |
| Phosalone         | 1.17 | 1.28 | 1.26 | 1.56 | 1.67 | 1.30 |
| Pyriproxyfen      | 1.43 | 1.09 | 1.51 | 1.27 | 1.05 | 1.18 |
| Mirex             | 1.50 | 1.57 | 1.67 | 1.00 | 1.55 | 1.68 |
| Mefenacet         | 1.01 | 1.58 | 1.95 | 1.11 | 1.36 | 1.40 |
| Cyhalothrin       | 1.03 | 1.55 | 1.26 | 1.26 | 1.26 | 1.25 |
| Tralkoxydim       | 1.56 | 1.75 | 1.24 | 1.01 | 1.41 | 1.16 |
| Fenarimol         | 1.35 | 1.72 | 1.55 | 1.25 | 1.58 | 1.98 |
| Trifenmorph       | 1.17 | 1.62 | 1.66 | 1.28 | 1.76 | 1.87 |

|                      |      |      |      |      |      |      |
|----------------------|------|------|------|------|------|------|
| Azinphos-ethyl       | 1.57 | 1.31 | 1.15 | 1.09 | 1.18 | 1.55 |
| Pyrazophos           | 1.59 | 1.34 | 1.46 | 1.40 | 1.57 | 1.29 |
| Acrinathrin          | 1.18 | 1.70 | 1.51 | 1.51 | 1.46 | 1.11 |
| Fluoroglycofen-ethyl | 1.38 | 1.27 | 1.98 | 1.31 | 1.70 | 1.09 |
| Fenoxaprop-ethyl     | 1.09 | 1.52 | 1.69 | 1.31 | 1.68 | 1.98 |
| Bitertanol           | 1.19 | 1.23 | 1.48 | 1.27 | 1.30 | 1.25 |
| Spirodiclofen        | 1.35 | 1.68 | 1.05 | 1.31 | 1.37 | 1.93 |
| Permethrin           | 1.30 | 1.77 | 1.77 | 1.06 | 1.70 | 1.61 |
| Pyridaben            | 1.07 | 1.07 | 1.33 | 1.05 | 1.45 | 1.26 |
| Fluquinconazole      | 1.11 | 1.46 | 1.03 | 1.40 | 1.66 | 1.61 |
| Coumaphos            | 1.42 | 1.56 | 1.08 | 1.15 | 1.73 | 1.95 |
| Prochloraz           | 1.30 | 1.73 | 1.42 | 1.31 | 1.58 | 1.25 |
| Butafenacil          | 1.52 | 1.06 | 1.44 | 1.09 | 1.74 | 1.01 |
| Prallethrin          | 1.32 | 1.14 | 1.90 | 1.15 | 1.80 | 1.63 |
| Cyfluthrin           | 1.24 | 1.25 | 1.79 | 1.29 | 1.19 | 1.58 |
| Cypermethrin         | 1.38 | 1.43 | 1.02 | 1.14 | 1.64 | 1.87 |
| Boscalid             | 1.00 | 1.53 | 1.61 | 1.45 | 1.19 | 1.81 |
| Quizalofop-ethyl     | 1.31 | 1.65 | 1.71 | 1.28 | 1.11 | 1.96 |
| Flucythrinate        | 1.13 | 1.52 | 1.55 | 1.03 | 1.29 | 1.44 |
| Etofenprox           | 1.32 | 1.32 | 1.82 | 1.22 | 1.65 | 1.95 |
| Pyridalyl            | 1.55 | 1.50 | 1.55 | 1.33 | 1.61 | 1.92 |
| Fenvalerate          | 1.03 | 1.78 | 1.34 | 1.46 | 1.33 | 2.00 |
| Flumioxazin          | 1.48 | 1.43 | 1.23 | 1.36 | 1.40 | 1.29 |
| Pyraclostrobin       | 1.06 | 1.48 | 1.74 | 1.38 | 1.56 | 1.17 |
| tau-Fluvalinate      | 1.01 | 1.40 | 1.96 | 1.51 | 1.29 | 1.13 |

|                |      |      |      |      |      |      |
|----------------|------|------|------|------|------|------|
| Difenoconazole | 1.40 | 1.64 | 1.59 | 1.52 | 1.76 | 1.92 |
| Deltamethrin   | 1.42 | 1.39 | 1.55 | 1.49 | 1.01 | 1.48 |
| Azoxystrobin   | 1.47 | 1.65 | 1.15 | 1.32 | 1.21 | 1.34 |
| Dimethomorph   | 1.53 | 1.60 | 1.96 | 1.19 | 1.48 | 1.82 |

<sup>a</sup>ME: matrix effects are expressed as the ratio between the calibration curve slopes of maix-matched standards (m-PFC cleanup) and solvent-based standards.

<sup>b</sup> ME: matrix effects are expressed as the ratio between the calibration curve slopes of maix-matched standards (QuEChERS cleanup/complex matrix) and solvent-based standards.

<sup>c</sup> ME: matrix effects are expressed as the ratio between the calibration curve slopes of maix-matched standards (QuEChERS cleanup/simple matrix) and solvent-based standards.



**Table S3.** Correlation coefficients ( $R^2$ ), limits of detection, spiked recoveries and RSDs of the 350 pesticides in orange juice and celery juice (n=6).

| Pesticides                        | orange juice                        |                              |                              |                  |                  |                  | celery juice                        |                              |                              |                  |                  |                  |
|-----------------------------------|-------------------------------------|------------------------------|------------------------------|------------------|------------------|------------------|-------------------------------------|------------------------------|------------------------------|------------------|------------------|------------------|
|                                   | Correlation<br>coefficient<br>$R^2$ | LOD/<br>( $\mu\text{g/kg}$ ) | LOQ/<br>( $\mu\text{g/kg}$ ) | Recoveries (%)   |                  |                  | Correlation<br>coefficient<br>$R^2$ | LOD/<br>( $\mu\text{g/kg}$ ) | LOQ/<br>( $\mu\text{g/kg}$ ) | Recoveries (%)   |                  |                  |
|                                   |                                     |                              |                              | 10               | 100              | 500              |                                     |                              |                              | 10               | 100              | 500              |
|                                   |                                     |                              |                              | $\mu\text{g/kg}$ | $\mu\text{g/kg}$ | $\mu\text{g/kg}$ |                                     |                              |                              | $\mu\text{g/kg}$ | $\mu\text{g/kg}$ | $\mu\text{g/kg}$ |
| Clopyralid                        | 0.9933                              | 3.0                          | 10.0                         | 78.4(9.1)        | 78.0(6.2)        | 82.3(5.4)        | 0.9923                              | 3.0                          | 10.0                         | 74.5(5.2)        | 81.4(7.2)        | 84.1(7.1)        |
| Dichlorvos                        | 0.9924                              | 3.0                          | 10.0                         | 73.4(7.1)        | 74.2(9.3)        | 77.1(6.5)        | 0.9946                              | 3.0                          | 10.0                         | 75.8(6.2)        | 79.4(10.4)       | 79.1(9.5)        |
| Methamidophos                     | 0.9990                              | 1.0                          | 3.0                          | 73.2(9.2)        | 78.3(8.2)        | 84.3(5.3)        | 0.9914                              | 3.0                          | 10.0                         | 74.3(9.1)        | 76.4(7.2)        | 78.7(4.3)        |
| Thiofanox                         | 0.9969                              | 1.0                          | 3.0                          | 78.2(7.2)        | 83.1(9.3)        | 96.2(7.1)        | 0.9982                              | 1.0                          | 3.0                          | 102.2(8.1)       | 81.8(6.8)        | 88.4(6.1)        |
| Allidochlor                       | 0.9987                              | 0.3                          | 1.0                          | 91.2(6.4)        | 92.1(4.2)        | 85.3(7.4)        | 0.9911                              | 0.3                          | 1.0                          | 103.4(6.2)       | 82.2(5.2)        | 95.5(4.0)        |
| Dichlobenil                       | 0.9927                              | 0.3                          | 1.0                          | 103.8(7.1)       | 104.1(4.0)       | 94.4(5.6)        | 0.9950                              | 0.3                          | 1.0                          | 79.8(9.4)        | 88.4(5.1)        | 92.2(6.3)        |
| EPTC                              | 0.9928                              | 0.3                          | 1.0                          | 95.4(6.1)        | 95.3(4.3)        | 94.5(2.4)        | 0.9941                              | 0.3                          | 1.0                          | 105.1(5.1)       | 87.8(6.4)        | 88.5(7.4)        |
| Dichlormid                        | 0.9935                              | 0.3                          | 1.0                          | 102.4(6.2)       | 87.4(5.3)        | 102.5(5.6)       | 0.9965                              | 0.3                          | 1.0                          | 92.2(6.6)        | 93.1(6.7)        | 102.4(6.2)       |
| 2,4,6-Trichlorophenol             | 0.9914                              | 0.5                          | 2.0                          | 94.3(9.2)        | 84.3(5.4)        | 81.5(7.7)        | 0.9954                              | 0.5                          | 2.0                          | 87.2(7.2)        | 99.1(8.3)        | 96.3(6.2)        |
| 3,5-Dichloroaniline               | 0.9985                              | 0.5                          | 2.0                          | 107.2(8.1)       | 106.2(6.5)       | 95.2(3.9)        | 0.9993                              | 0.5                          | 2.0                          | 95.4(5.1)        | 87.6(5.1)        | 88.4(9.5)        |
| O-Phthalimide                     | 0.9943                              | 0.3                          | 1.0                          | 104.3(5.1)       | 89.4(4.2)        | 91.7(5.3)        | 0.9953                              | 0.3                          | 1.0                          | 103.1(6.1)       | 101.5(4.6)       | 93.1(8.2)        |
| Mevinphos                         | 0.9979                              | 1.0                          | 3.0                          | 74.2(6.4)        | 87.2(7.4)        | 101.4(4.3)       | 0.9902                              | 3.0                          | 10.0                         | 72.4(4.2)        | 93.4(4.1)        | 103.3(8.1)       |
| Acephate                          | 0.9922                              | 0.3                          | 1.0                          | 101.4(6.1)       | 109.4(9.1)       | 82.55(6.1)       | 0.9980                              | 0.3                          | 1.0                          | 79.5(9.4)        | 80.5(7.7)        | 86.3(5.5)        |
| Vernolate                         | 0.9995                              | 0.3                          | 1.0                          | 105.3(8.1)       | 76.5(8.1)        | 81.0(7.3)        | 0.9934                              | 0.3                          | 1.0                          | 102.1(9.3)       | 95.5(6.1)        | 93.2(9.2)        |
| Propham                           | 0.9931                              | 0.3                          | 1.0                          | 94.5(7.2)        | 110.2(8.1)       | 107.2(5.8)       | 0.9982                              | 0.5                          | 2.0                          | 95.1(6.3)        | 98.4(7.5)        | 97.2(5.2)        |
| Etridiazole                       | 0.9951                              | 1.0                          | 3.0                          | 107.1(7.5)       | 87.3(7.4)        | 97.2(6.2)        | 0.9929                              | 1.0                          | 3.0                          | 91.4(4.5)        | 92.3(6.3)        | 105.1(7.1)       |
| Pebulate                          | 0.9937                              | 1.0                          | 3.0                          | 101.3(5.2)       | 79.2(9.1)        | 96.5(7.8)        | 0.9992                              | 1.0                          | 3.0                          | 106.6(8.3)       | 104.1(7.6)       | 102.1(5.2)       |
| cis-1,2,3,6-Tetrahydrophthalimide | 0.9958                              | 0.5                          | 2.0                          | 96.5(5.5)        | 83.4(9.2)        | 80.2(9.1)        | 0.9987                              | 0.5                          | 2.0                          | 94.1(8.3)        | 95.3(6.5)        | 93.4(9.3)        |

|                            |        |     |      |            |            |            |        |     |      |            |            |            |
|----------------------------|--------|-----|------|------------|------------|------------|--------|-----|------|------------|------------|------------|
| Chloroneb                  | 0.9943 | 1.0 | 3.0  | 104.3(7.4) | 80.5(9.6)  | 95.4(5.2)  | 0.9975 | 1.0 | 3.0  | 108.6(5.7) | 102.2(5.1) | 109.2(7.3) |
| Tebuthiuron                | 0.9979 | 0.3 | 1.0  | 107.4(7.4) | 85.5(9.3)  | 96.4(5.5)  | 0.9933 | 0.3 | 1.0  | 79.4(10.1) | 103.1(7.3) | 104.1(7.2) |
| Fenobucarb                 | 0.9989 | 1.0 | 3.0  | 95.1(6.3)  | 93.2(9.1)  | 106.3(9.1) | 0.9950 | 1.0 | 3.0  | 83.4(9.1)  | 79.4(9.3)  | 94.5(6.4)  |
| Pentachlorobenzene         | 0.9968 | 0.5 | 2.0  | 89.1(8.2)  | 74.3(9.4)  | 96.2(8.3)  | 0.9952 | 0.5 | 2.0  | 82.8(8.6)  | 1054(9.1)  | 102.5(9.6) |
| Isoprocab                  | 0.9952 | 0.5 | 2.0  | 92.4(2.2)  | 75.6(9.7)  | 107.5(6.6) | 0.9947 | 0.5 | 2.0  | 84.1(7.2)  | 94.3(4.4)  | 84.8(6.9)  |
| Molinate                   | 0.9952 | 0.5 | 2.0  | 85.0(7.1)  | 107.2(9.3) | 117.2(7.1) | 0.9962 | 0.5 | 2.0  | 93.7(9.2)  | 118.1(8.4) | 123.4(9.5) |
| Heptenophos                | 0.9920 | 0.5 | 2.0  | 95.4(6.1)  | 80.2(9.4)  | 92.1(9.2)  | 0.9937 | 0.5 | 2.0  | 111.6(7.7) | 103.8(8.9) | 105.1(7.4) |
| Chlorfenprop-methyl        | 0.9965 | 1.0 | 3.0  | 94.3(9.4)  | 73.5(9.6)  | 107.4(8.5) | 0.9969 | 10  | 3.0  | 97.2(9.1)  | 94.2(9.3)  | 84.7(8.2)  |
| Omethoate                  | 0.9993 | 1.0 | 3.0  | 84.6(7.3)  | 75.8(9.2)  | 106.6(7.7) | 0.9915 | 3.0 | 10.0 | 101.3(5.3) | 84.4(9.5)  | 94.0(8.1)  |
| Propoxur                   | 0.9951 | 0.3 | 1.0  | 90.5(8.4)  | 99.5(9.1)  | 96.9(7.2)  | 0.9980 | 0.3 | 1.0  | 85.5(4.6)  | 90.7(8.8)  | 105.2(4.3) |
| Tecnazene                  | 0.9946 | 0.5 | 2.0  | 105.3(7.1) | 81.2(9.5)  | 98.6(7.7)  | 0.9981 | 0.5 | 2.0  | 97.5(9.2)  | 103.4(8.5) | 106.5(7.4) |
| Propachlor                 | 0.9951 | 1.0 | 3.0  | 92.5(6.6)  | 90.4(4.2)  | 94.5(5.2)  | 0.9908 | 3.0 | 10.0 | 81.6(9.5)  | 92.3(6.1)  | 94.5(5.3)  |
| Diphenylamine              | 0.9962 | 0.3 | 1.0  | 93.4(6.1)  | 94.2(4.5)  | 100.2(6.3) | 0.9982 | 0.3 | 1.0  | 90.4(4.3)  | 97.2(5.3)  | 96.9(6.2)  |
| Ethoprophos                | 0.9942 | 3.0 | 10.0 | 103.4(4.5) | 75.6(9.7)  | 107.9(8.1) | 0.9968 | 3.0 | 10.0 | 94.5(6.6)  | 83.7(8.8)  | 84.2(8.3)  |
| Cycloate                   | 0.9973 | 0.5 | 2.0  | 109.5(7.6) | 92.7(4.8)  | 96.9(8.0)  | 0.9944 | 0.5 | 2.0  | 87.5(4.6)  | 104.7(5.8) | 93.3(8.2)  |
| 2,3,5,6-tetrachloroaniline | 0.9929 | 1.0 | 3.0  | 97.4(9.5)  | 84.6(9.7)  | 93.1(7.3)  | 0.9992 | 1.0 | 3.0  | 83.5(4.2)  | 103.3(7.3) | 108.8(9.3) |
| Atrazine-desethyl          | 0.9949 | 0.3 | 1.0  | 101.1(4.3) | 94.4(6.3)  | 103.1(4.2) | 0.9923 | 0.5 | 2.0  | 102.3(9.6) | 94.4(7.2)  | 95.5(4.2)  |
| Dicrotophos                | 0.9950 | 1.0 | 3.0  | 85.3(4.4)  | 84.5(8.1)  | 105.5(7.2) | 0.9941 | 1.0 | 3.0  | 96.4(7.1)  | 92.5(8.3)  | 107.3(5.2) |
| Methabenzthiazuron         | 0.9916 | 0.5 | 2.0  | 94.2(8.2)  | 97.1(4.4)  | 113.4(7.2) | 0.9992 | 0.5 | 2.0  | 98.2(11.3) | 95.8(6.6)  | 108.6(8.3) |
| Trifluralin                | 0.9927 | 0.3 | 1.0  | 104.5(4.4) | 83.5(2.4)  | 97.3(9.1)  | 0.9936 | 0.3 | 1.0  | 78.5(7.2)  | 104.1(4.4) | 109.4(9.5) |
| Bendiocarb                 | 0.9999 | 0.5 | 2.0  | 92.3(8.2)  | 102.4(9.4) | 101.3(4.4) | 0.9900 | 0.5 | 2.0  | 97.5(9.2)  | 92.5(8.4)  | 95.3(6.4)  |
| Benfluralin                | 0.9974 | 0.3 | 1.0  | 107.5(9.4) | 96.5(7.1)  | 88.2(4.5)  | 0.9978 | 0.3 | 1.0  | 74.4(8.1)  | 103.3(8.5) | 88.3(4.2)  |
| Sulfotep                   | 0.9970 | 0.5 | 2.0  | 92.3(7.4)  | 98.4(7.2)  | 94.2(8.2)  | 0.9956 | 0.5 | 2.0  | 104.2(7.3) | 96.3(7.1)  | 95.4(6.3)  |
| Cadusafos                  | 0.9928 | 0.3 | 1.0  | 103.5(9.5) | 78.4(9.1)  | 80.2(7.4)  | 0.9964 | 0.3 | 1.0  | 114.1(9.3) | 113.5(9.1) | 92.2(7.3)  |
| Tebutam                    | 0.9949 | 3.0 | 10.0 | 110.3(8.1) | 97.2(9.4)  | 99.3(6.4)  | 0.9949 | 3.0 | 10.0 | 92.9(9.2)  | 113.1(8.2) | 96.3(7.3)  |

|                                 |        |     |      |            |            |            |        |     |      |            |            |            |
|---------------------------------|--------|-----|------|------------|------------|------------|--------|-----|------|------------|------------|------------|
| Promecarb                       | 0.9991 | 1.0 | 3.0  | 80.2(9.2)  | 72.8(9.2)  | 92.1(9.1)  | 0.9982 | 1.0 | 3.0  | 102.3(4.2) | 121.3(9.2) | 99.3(8.3)  |
| Phorate                         | 0.9914 | 0.5 | 2.0  | 95.2(6.3)  | 90.4(9.5)  | 88.6(8.2)  | 0.9997 | 0.5 | 2.0  | 87.8(4.4)  | 97.9(6.3)  | 77.6(11.3) |
| Atraton                         | 0.9950 | 3.0 | 10.0 | 95.5(8.6)  | 92.3(8.5)  | 100.5(5.2) | 0.9944 | 3.0 | 10.0 | 89.6(7.5)  | 111.4(6.3) | 95.5(9.0)  |
| 3,4,5-Trimethacarb              | 0.9925 | 1.0 | 3.0  | 81.4(4.4)  | 93.5(8.6)  | 80.4(9.8)  | 0.9987 | 3.0 | 10.0 | 95.4(6.2)  | 110.3(4.6) | 86.7(6.8)  |
| Dicloran                        | 0.9935 | 3.0 | 10.0 | 95.1(6.3)  | 97.2(7.4)  | 99.3(9.1)  | 0.9911 | 3.0 | 10.0 | 92.7(7.8)  | 113.1(6.3) | 96.5(8.6)  |
| Pentachloroanisole              | 0.9992 | 3.0 | 10.0 | 78.8(9.6)  | 78.4(6.3)  | 84.5(6.4)  | 0.9910 | 3.0 | 10.0 | 81.6(6.7)  | 82.5(8.2)  | 82.8(7.2)  |
| Ethoxyquin                      | 0.9958 | 3.0 | 10.0 | 75.5(9.2)  | 73.4(8.9)  | 74.4(7.5)  | 0.9997 | 3.0 | 10.0 | 75.1(7.4)  | 78.5(8.2)  | 78.1(8.2)  |
| Prometon                        | 0.9991 | 1.0 | 3.0  | 82.8(5.1)  | 89.3(2.2)  | 92.3(6.2)  | 0.9945 | 3.0 | 10.0 | 83.3(3.1)  | 82.4(5.2)  | 89.2(5.3)  |
| Atrazine                        | 0.9945 | 1.0 | 3.0  | 88.2(8.4)  | 82.3(9.3)  | 95.3(7.1)  | 0.9940 | 1.0 | 3.0  | 103.4(7.1) | 81.6(6.6)  | 93.2(6.1)  |
| Monolinuron                     | 0.9904 | 0.3 | 1.0  | 92.5(6.6)  | 93.5(5.4)  | 86.7(7.5)  | 0.9929 | 0.3 | 1.0  | 103.2(6.2) | 84.5(6.4)  | 95.3(4.5)  |
| Propazine                       | 0.9910 | 0.3 | 1.0  | 105.5(7.3) | 105.2(4.4) | 94.5(5.3)  | 0.9946 | 0.3 | 1.0  | 79.8(8.2)  | 88.4(7.1)  | 98.5(7.2)  |
| Clomazone                       | 0.9935 | 0.3 | 1.0  | 95.3(6.1)  | 95.6(4.4)  | 94.5(4.6)  | 0.9936 | 0.3 | 1.0  | 105.6(8.1) | 88.2(6.4)  | 88.5(7.2)  |
| $\alpha$ -Hexachlorocyclohexane | 0.9976 | 1.0 | 3.0  | 96.5(5.4)  | 80.3(4.3)  | 102.4(8.2) | 0.9949 | 1.0 | 3.0  | 95.4(6.7)  | 108.5(9.6) | 109.5(9.6) |
| Terbumeton                      | 0.9970 | 0.3 | 1.0  | 102.3(7.4) | 87.5(7.4)  | 101.2(5.5) | 0.9951 | 0.3 | 1.0  | 92.5(6.2)  | 93.4(6.4)  | 103.1(8.3) |
| $\beta$ -Hexachlorocyclohexane  | 0.9937 | 0.5 | 2.0  | 93.2(9.2)  | 84.1(6.2)  | 81.2(7.3)  | 0.9923 | 0.5 | 2.0  | 85.3(7.2)  | 98.3(8.4)  | 93.2(7.3)  |
| Aminocarb                       | 0.9920 | 0.5 | 2.0  | 106.1(8.3) | 106.1(6.4) | 94.3(5.1)  | 0.9972 | 0.5 | 2.0  | 95.8(6.2)  | 87.3(6.4)  | 88.1(9.2)  |
| Isocarbamid                     | 0.9993 | 0.3 | 1.0  | 104.5(7.1) | 89.4(5.2)  | 91.6(6.3)  | 0.9938 | 0.5 | 2.0  | 103.3(9.5) | 102.1(6.3) | 93.5(8.3)  |
| Cyromazine                      | 0.9945 | 1.0 | 3.0  | 78.2(6.3)  | 87.5(7.2)  | 101.4(5.2) | 0.9965 | 3.0 | 10.0 | 76.7(6.2)  | 93.2(6.1)  | 103.5(8.4) |
| $\gamma$ -Hexachlorocyclohexane | 0.9934 | 0.3 | 1.0  | 101.3(7.2) | 108.3(9.2) | 82.5(8.2)  | 0.9936 | 0.3 | 1.0  | 79.9(9.6)  | 80.1(9.4)  | 86.9(5.3)  |
| Propetamphos                    | 0.9984 | 0.3 | 1.0  | 105.3(8.2) | 76.8(10.1) | 80.5(9.3)  | 0.9969 | 0.3 | 1.0  | 103.5(9.2) | 95.2(6.1)  | 93.4(8.2)  |
| Cycluron                        | 0.9933 | 0.3 | 1.0  | 94.5(7.1)  | 112.6(8.2) | 108.6(5.1) | 0.9968 | 0.5 | 2.0  | 95.4(6.4)  | 98.4(8.2)  | 97.7(5.3)  |
| Terbuthylazine                  | 0.9919 | 1.0 | 3.0  | 108.5(7.1) | 87.4(7.3)  | 97.5(8.1)  | 0.9953 | 1.0 | 3.0  | 91.5(4.9)  | 92.6(6.2)  | 105.3(8.1) |

|                             |        |     |      |            |            |            |        |     |      |            |            |            |
|-----------------------------|--------|-----|------|------------|------------|------------|--------|-----|------|------------|------------|------------|
| Terbufos                    | 0.9915 | 1.0 | 3.0  | 101.2(6.2) | 79.1(9.1)  | 96.7(7.2)  | 0.9943 | 1.0 | 3.0  | 107.4(9.6) | 105.5(7.1) | 102.2(7.2) |
| Cyanophos                   | 0.9990 | 0.5 | 2.0  | 96.2(10.8) | 83.3(9.1)  | 80.7(9.1)  | 0.9987 | 0.5 | 2.0  | 94.8(8.4)  | 96.4(6.2)  | 93.1(7.2)  |
| Trietazine                  | 0.9970 | 1.0 | 3.0  | 104.1(7.3) | 80.2(8.7)  | 95.8(6.2)  | 0.9967 | 1.0 | 3.0  | 108.5(6.3) | 102.5(9.1) | 109.3(7.2) |
| Quintozene                  | 0.9967 | 3.0 | 10.0 | 75.4(9.1)  | 78.0(6.2)  | 82.3(5.8)  | 0.9955 | 3.0 | 10.0 | 73.5(6.2)  | 81.4(9.2)  | 82.1(7.1)  |
| Fonofos                     | 0.9916 | 3.0 | 10.0 | 73.8(6.1)  | 74.2(9.3)  | 74.1(6.3)  | 0.9981 | 3.0 | 10.0 | 75.8(6.2)  | 79.4(10.2) | 79.1(9.5)  |
| Pyroquilon                  | 0.9983 | 1.0 | 3.0  | 74.2(8.2)  | 78.3(8.2)  | 84.3(5.2)  | 0.9998 | 3.0 | 10.0 | 74.3(9.1)  | 76.4(7.2)  | 79.7(4.3)  |
| Dinoterb                    | 0.9914 | 1.0 | 3.0  | 78.2(7.2)  | 83.1(9.3)  | 96.2(7.0)  | 0.9965 | 1.0 | 3.0  | 102.2(8.1) | 81.8(6.8)  | 88.4(6.1)  |
| Pyrimethanil                | 0.9996 | 0.3 | 1.0  | 122.2(6.9) | 122.1(4.2) | 120.3(7.1) | 0.9926 | 0.3 | 1.0  | 120.4(6.2) | 121.2(5.2) | 120.5(4.0) |
| Diazinon                    | 0.9956 | 0.3 | 1.0  | 103.5(6.1) | 104.1(4.0) | 94.4(5.3)  | 0.9929 | 0.3 | 1.0  | 79.8(9.2)  | 88.4(5.1)  | 97.2(6.3)  |
| Flufenoxuron                | 0.9945 | 0.3 | 1.0  | 95.4(6.1)  | 95.3(4.3)  | 94.5(4.6)  | 0.9930 | 0.3 | 1.0  | 104.1(5.1) | 88.8(6.4)  | 88.5(7.4)  |
| Disulfoton                  | 0.9903 | 0.3 | 1.0  | 102.3(3.2) | 87.4(5.3)  | 101.5(5.1) | 0.9946 | 0.3 | 1.0  | 92.2(6.4)  | 93.1(6.7)  | 103.4(6.2) |
| Paraoxon-methyl             | 0.9905 | 0.5 | 2.0  | 94.8(9.2)  | 84.3(2.4)  | 81.5(7.4)  | 0.9912 | 0.5 | 2.0  | 87.2(7.2)  | 99.1(8.3)  | 94.3(6.2)  |
| Secbumeton                  | 0.9955 | 0.5 | 2.0  | 105.2(8.1) | 106.2(6.5) | 95.2(3.1)  | 0.9935 | 0.5 | 2.0  | 95.4(5.1)  | 87.6(3.3)  | 88.4(9.5)  |
| Aziprotryne                 | 0.9906 | 0.3 | 1.0  | 104.3(5.1) | 89.4(4.2)  | 91.7(4.3)  | 0.9966 | 0.5 | 2.0  | 103.1(2.0) | 102.5(4.2) | 93.1(8.2)  |
| Dinitramine                 | 0.9989 | 1.0 | 3.0  | 74.2(6.4)  | 87.2(7.4)  | 101.4(5.3) | 0.9964 | 3.0 | 10.0 | 79.3(4.2)  | 93.4(5.1)  | 103.3(8.1) |
| Fenfuram                    | 0.9990 | 0.3 | 1.0  | 101.4(6.1) | 109.4(9.1) | 82.55(8.1) | 0.9983 | 0.3 | 1.0  | 79.5(9.4)  | 80.5(8.7)  | 86.3(5.5)  |
| δ-Hexachlorocyclohexan<br>e | 0.9963 | 0.3 | 1.0  | 105.3(5.1) | 76.5(8.1)  | 81.0(8.3)  | 0.9903 | 0.3 | 1.0  | 102.1(9.3) | 95.5(6.2)  | 93.2(9.2)  |
| Mexacarbate                 | 0.9936 | 0.3 | 1.0  | 94.5(7.2)  | 110.2(8.1) | 107.2(5.2) | 0.9923 | 0.5 | 2.0  | 95.1(6.3)  | 98.4(7.2)  | 97.2(5.2)  |
| Isazofos                    | 0.9957 | 1.0 | 3.0  | 108.1(7.5) | 87.3(7.4)  | 97.2(6.1)  | 0.9936 | 1.0 | 3.0  | 91.4(4.5)  | 92.3(6.5)  | 105.1(7.1) |
| Chlorothalonil              | 0.9946 | 1.0 | 3.0  | 103.3(5.2) | 79.2(9.1)  | 96.5(7.3)  | 0.9905 | 1.0 | 3.0  | 106.3(8.3) | 104.1(7.2) | 102.1(5.2) |
| Triallate                   | 0.9988 | 0.5 | 2.0  | 96.5(5.5)  | 83.4(9.2)  | 80.2(9.2)  | 0.9932 | 0.5 | 2.0  | 94.1(8.3)  | 95.3(6.1)  | 93.4(9.3)  |
| Tebupirimfos                | 0.9983 | 0.3 | 1.0  | 105.3(7.4) | 80.5(9.6)  | 95.4(5.2)  | 0.9982 | 1.0 | 3.0  | 108.6(5.3) | 102.2(5.1) | 109.2(7.3) |
| musk ambrette               | 0.9955 | 0.3 | 1.0  | 106.4(7.4) | 85.5(9.3)  | 96.4(5.5)  | 0.9960 | 0.3 | 1.0  | 79.4(10.1) | 103.1(7.3) | 104.1(7.2) |
| Oxabetrinil                 | 0.9954 | 1.0 | 3.0  | 95.1(4.3)  | 93.2(9.1)  | 106.3(9.1) | 0.9902 | 1.0 | 3.0  | 83.4(9.2)  | 79.4(9.3)  | 94.5(6.4)  |

|                    |        |     |      |            |            |            |        |     |      |            |            |            |
|--------------------|--------|-----|------|------------|------------|------------|--------|-----|------|------------|------------|------------|
| Iprobenfos         | 0.9914 | 0.5 | 2.0  | 89.1(8.2)  | 74.3(9.4)  | 96.2(8.3)  | 0.9998 | 0.5 | 2.0  | 82.8(8.9)  | 105.0(9.1) | 102.5(9.6) |
| Fluroxypyr         | 0.9968 | 0.5 | 2.0  | 92.4(6.5)  | 75.6(9.7)  | 107.5(6.6) | 0.9967 | 0.5 | 2.0  | 84.1(7.2)  | 94.3(4.4)  | 84.8(6.9)  |
| Pirimicarb         | 0.9947 | 0.5 | 2.0  | 85.0(7.1)  | 107.2(9.3) | 117.2(9.1) | 0.9966 | 0.5 | 2.0  | 93.7(9.8)  | 118.1(8.4) | 123.4(9.5) |
| Monalide           | 0.9992 | 0.5 | 2.0  | 95.4(6.1)  | 80.2(9.4)  | 92.1(9.2)  | 0.9934 | 0.5 | 2.0  | 111.6(7.7) | 103.8(8.9) | 105.1(7.4) |
| Furmecyclox        | 0.9981 | 1.0 | 3.0  | 94.3(7.4)  | 73.5(9.6)  | 107.4(8.5) | 0.9920 | 10  | 3.0  | 97.0(9.1)  | 94.2(9.3)  | 84.7(8.2)  |
| Benoxacor          | 0.9947 | 1.0 | 3.0  | 84.6(8.3)  | 75.8(9.2)  | 106.6(8.7) | 0.9995 | 3.0 | 10.0 | 101.3(5.0) | 84.4(9.5)  | 94.0(8.1)  |
| Pentachloroaniline | 0.9913 | 0.3 | 1.0  | 92.5(8.4)  | 99.5(9.1)  | 96.9(7.2)  | 0.9960 | 0.3 | 1.0  | 85.5(4.6)  | 90.7(8.8)  | 105.2(4.3) |
| Benfuresate        | 0.9950 | 0.5 | 2.0  | 105.3(7.1) | 81.2(9.5)  | 98.6(7.7)  | 0.9974 | 0.5 | 2.0  | 97.5(9.2)  | 103.4(8.5) | 106.5(7.4) |
| Dioxacarb          | 0.9945 | 1.0 | 3.0  | 92.5(6.6)  | 90.4(4.2)  | 114.5(5.2) | 0.9963 | 3.0 | 10.0 | 111.6(9.2) | 112.3(6.1) | 94.5(5.3)  |
| Cyprazine          | 0.9957 | 0.3 | 1.0  | 103.4(6.1) | 105.2(4.5) | 109.2(6.3) | 0.9927 | 0.3 | 1.0  | 108.4(4.3) | 106.2(5.3) | 106.9(6.2) |
| Phosphamidon       | 0.9931 | 3.0 | 10.0 | 103.4(4.5) | 75.6(9.7)  | 107.9(8.1) | 0.9973 | 3.0 | 10.0 | 94.5(6.6)  | 83.7(9.8)  | 84.2(8.3)  |
| Dichlorprop        | 0.9917 | 0.3 | 1.0  | 104.2(7.3) | 87.4(8.2)  | 104.5(7.1) | 0.9969 | 0.3 | 1.0  | 84.5(8.7)  | 95.3(8.2)  | 101.4(5.3) |
| Dichlofenthion     | 0.9941 | 0.5 | 2.0  | 109.5(7.6) | 92.7(4.8)  | 96.9(8.0)  | 0.9941 | 0.5 | 2.0  | 87.5(4.6)  | 104.7(5.8) | 93.3(8.2)  |
| Fenthion           | 0.9970 | 1.0 | 3.0  | 97.5(9.5)  | 84.6(9.7)  | 93.1(7.3)  | 0.9978 | 1.0 | 3.0  | 83.5(4.2)  | 103.3(7.3) | 108.8(9.3) |
| Propanil           | 0.9970 | 0.3 | 1.0  | 101.1(4.3) | 94.4(6.3)  | 103.1(4.2) | 0.9958 | 0.5 | 2.0  | 102.3(9.2) | 94.4(7.2)  | 95.5(4.2)  |
| 2,4-DB             | 0.9901 | 1.0 | 3.0  | 87.3(4.4)  | 84.5(8.1)  | 104.5(7.2) | 0.9939 | 1.0 | 3.0  | 96.4(7.1)  | 92.5(8.3)  | 107.3(5.2) |
| Chlorthiamid       | 0.9909 | 0.5 | 2.0  | 94.2(8.2)  | 97.1(4.4)  | 113.4(7.2) | 0.9936 | 0.5 | 2.0  | 98.2(7.3)  | 95.8(6.6)  | 108.6(8.3) |
| Dimethachlor       | 0.9932 | 0.3 | 1.0  | 106.5(4.4) | 83.5(5.3)  | 97.3(9.1)  | 0.9917 | 0.3 | 1.0  | 78.5(9.2)  | 104.1(4.4) | 109.4(2.1) |
| Metribuzin         | 0.9957 | 0.5 | 2.0  | 92.3(5.2)  | 102.4(9.4) | 101.3(4.4) | 0.9906 | 0.5 | 2.0  | 97.5(9.2)  | 92.5(8.4)  | 95.3(6.4)  |
| Dimethenamid       | 0.9958 | 0.3 | 1.0  | 107.5(8.4) | 96.5(7.1)  | 88.2(4.5)  | 0.9989 | 0.3 | 1.0  | 89.7(9.1)  | 103.3(9.5) | 88.3(4.2)  |
| Bromobutide        | 0.9965 | 0.5 | 2.0  | 96.3(7.4)  | 98.4(7.2)  | 94.2(8.2)  | 0.9946 | 0.5 | 2.0  | 104.2(7.3) | 96.3(7.1)  | 95.4(6.3)  |
| Terbucarb          | 0.9912 | 0.3 | 1.0  | 102.5(9.5) | 78.4(9.1)  | 80.2(7.4)  | 0.9948 | 0.3 | 1.0  | 114.1(6.4) | 113.5(9.1) | 92.2(7.3)  |
| Malaoxon           | 0.9925 | 0.5 | 2.0  | 110.3(8.1) | 97.2(9.4)  | 99.3(6.4)  | 0.9953 | 3.0 | 10.0 | 92.9(9.2)  | 113.1(8.2) | 96.3(7.3)  |
| Vinclozolin        | 0.9923 | 1.0 | 3.0  | 86.2(9.2)  | 72.8(9.2)  | 92.1(9.1)  | 0.9991 | 1.0 | 3.0  | 101.3(4.2) | 122.3(9.2) | 99.3(8.3)  |
| Parathion-methyl   | 0.9995 | 0.5 | 2.0  | 95.1(6.3)  | 90.4(9.5)  | 88.6(8.2)  | 0.9965 | 0.5 | 2.0  | 88.8(4.4)  | 97.9(6.3)  | 77.6(10.3) |

|                          |        |     |      |            |            |            |        |     |      |            |            |            |
|--------------------------|--------|-----|------|------------|------------|------------|--------|-----|------|------------|------------|------------|
| Chlorpyrifos-methyl      | 0.9953 | 1.0 | 3.0  | 96.5(5.4)  | 80.3(4.3)  | 102.4(8.2) | 0.9989 | 1.0 | 3.0  | 95.4(6.7)  | 108.5(9.6) | 109.5(9.6) |
| Transfluthrin            | 0.9952 | 3.0 | 10.0 | 95.5(7.6)  | 92.3(8.5)  | 100.5(5.2) | 0.9980 | 3.0 | 10.0 | 88.6(7.5)  | 111.4(6.3) | 95.5(9.0)  |
| Simetryn                 | 0.9901 | 1.0 | 3.0  | 81.4(8.4)  | 93.5(8.6)  | 80.4(9.8)  | 0.9969 | 3.0 | 10.0 | 95.4(6.2)  | 110.3(5.6) | 86.7(6.8)  |
| Fuberidazole             | 0.9941 | 3.0 | 10.0 | 95.1(6.3)  | 97.2(7.4)  | 99.3(9.1)  | 0.9973 | 3.0 | 10.0 | 92.7(7.8)  | 113.1(8.3) | 96.5(8.6)  |
| Tolclofos-methyl         | 0.9948 | 1.0 | 3.0  | 78.6(9.6)  | 78.4(6.3)  | 84.5(6.4)  | 0.9959 | 3.0 | 10.0 | 79.6(6.7)  | 82.5(9.2)  | 82.8(7.2)  |
| Alachlor                 | 0.9980 | 3.0 | 10.0 | 75.5(9.2)  | 79.2(8.9)  | 74.4(10.4) | 0.9955 | 3.0 | 10.0 | 75.1(7.4)  | 78.5(8.2)  | 78.1(8.2)  |
| Ametryn                  | 0.9939 | 1.0 | 3.0  | 82.7(5.1)  | 89.3(6.2)  | 92.3(6.2)  | 0.9905 | 3.0 | 10.0 | 85.3(3.1)  | 82.4(5.2)  | 89.2(5.3)  |
| Heptachlor               | 0.9953 | 1.0 | 3.0  | 88.2(8.4)  | 82.3(9.3)  | 95.3(7.1)  | 0.9908 | 1.0 | 3.0  | 103.4(7.1) | 81.6(6.8)  | 93.2(6.1)  |
| Prometryn                | 0.9922 | 0.3 | 1.0  | 92.5(5.6)  | 93.5(5.4)  | 86.7(7.5)  | 0.9969 | 0.3 | 1.0  | 103.2(6.2) | 84.5(6.5)  | 95.3(4.5)  |
| Acetochlor               | 0.9950 | 0.3 | 1.0  | 105.5(7.3) | 105.2(4.4) | 94.5(5.3)  | 0.9939 | 0.3 | 1.0  | 79.8(8.2)  | 88.4(7.1)  | 98.5(7.2)  |
| Paraoxon-ethyl           | 0.9997 | 0.3 | 1.0  | 95.3(6.1)  | 95.6(4.4)  | 94.5(4.6)  | 0.9956 | 0.3 | 1.0  | 105.6(8.1) | 88.2(6.4)  | 88.5(7.2)  |
| Metalaxyl                | 0.9908 | 0.3 | 1.0  | 102.3(8.4) | 87.5(7.4)  | 101.2(5.5) | 0.9927 | 0.3 | 1.0  | 92.5(6.2)  | 93.4(6.4)  | 103.1(8.3) |
| Tridiphane               | 0.9906 | 0.5 | 2.0  | 93.9(9.2)  | 84.1(6.2)  | 81.2(7.3)  | 0.9993 | 0.5 | 2.0  | 85.3(7.2)  | 99.3(8.4)  | 93.2(7.3)  |
| Octachlorodipropyl ether | 0.9984 | 0.5 | 2.0  | 106.7(8.3) | 106.1(6.4) | 94.3(5.1)  | 0.9996 | 0.5 | 2.0  | 95.2(6.2)  | 87.3(6.4)  | 88.1(9.2)  |
| Prosulfocarb             | 0.9973 | 0.3 | 1.0  | 104.5(7.1) | 89.4(5.2)  | 91.4(6.3)  | 0.9950 | 0.5 | 2.0  | 103.3(9.3) | 102.1(6.3) | 93.5(8.3)  |
| Fenpropidin              | 0.9906 | 1.0 | 3.0  | 78.2(6.3)  | 87.5(7.2)  | 101.4(5.2) | 0.9921 | 3.0 | 10.0 | 82.9(6.2)  | 93.2(6.1)  | 103.5(8.4) |
| 1-Naphthylacetamide      | 0.9988 | 0.3 | 1.0  | 101.3(6.2) | 108.3(9.2) | 82.5(8.2)  | 0.9941 | 0.3 | 1.0  | 79.9(9.7)  | 80.1(9.4)  | 86.9(5.3)  |
| Dithiopyr                | 0.9984 | 0.3 | 1.0  | 105.3(8.2) | 76.8(9.1)  | 80.5(9.3)  | 0.9922 | 0.3 | 1.0  | 103.5(9.2) | 95.2(6.1)  | 93.4(8.2)  |
| Orbencarb                | 0.9988 | 0.3 | 1.0  | 94.5(9.1)  | 112.6(8.2) | 108.6(5.1) | 0.9955 | 0.5 | 2.0  | 95.4(6.2)  | 98.5(8.2)  | 97.7(5.3)  |
| Terbutryn                | 0.9932 | 1.0 | 3.0  | 108.5(7.1) | 87.4(7.3)  | 97.5(8.1)  | 0.9951 | 1.0 | 3.0  | 91.5(4.9)  | 92.6(6.2)  | 105.3(8.1) |
| Spiroxamine              | 0.9957 | 1.0 | 3.0  | 101.6(6.2) | 79.1(9.1)  | 96.7(7.2)  | 0.9968 | 1.0 | 3.0  | 107.4(9.3) | 105.5(7.1) | 102.2(7.2) |
| Methiocarb               | 0.9948 | 0.5 | 2.0  | 96.2(5.2)  | 83.3(9.1)  | 80.7(9.1)  | 0.9973 | 0.5 | 2.0  | 94.8(8.4)  | 95.4(6.2)  | 93.1(7.2)  |
| Fenitrothion             | 0.9967 | 1.0 | 3.0  | 102.1(7.3) | 80.2(8.7)  | 95.8(6.2)  | 0.9984 | 1.0 | 3.0  | 108.5(6.3) | 102.5(9.1) | 109.3(7.2) |
| Pirimiphos-methyl        | 0.9935 | 0.3 | 1.0  | 106.8(7.3) | 85.1(9.2)  | 96.9(5.4)  | 0.9973 | 0.3 | 1.0  | 79.9(9.2)  | 103.8(7.2) | 104.2(7.1) |

|                           |        |     |      |            |            |            |        |     |      |            |            |            |
|---------------------------|--------|-----|------|------------|------------|------------|--------|-----|------|------------|------------|------------|
| Methiocarb sulfone        | 0.9992 | 3.0 | 10.0 | 78.4(9.1)  | 78.0(6.2)  | 82.3(5.4)  | 0.9967 | 3.0 | 10.0 | 74.5(5.2)  | 81.4(7.2)  | 82.1(7.1)  |
| Ethofumesate              | 0.9993 | 3.0 | 10.0 | 79.6(7.1)  | 74.2(9.3)  | 74.1(6.5)  | 0.9910 | 3.0 | 10.0 | 75.8(6.2)  | 79.4(10.2) | 79.1(9.5)  |
| Linuron                   | 0.9999 | 1.0 | 3.0  | 73.2(9.2)  | 78.3(8.2)  | 84.3(5.3)  | 0.9961 | 3.0 | 10.0 | 74.3(9.1)  | 76.4(7.2)  | 79.7(4.3)  |
| Probenazole               | 0.9969 | 1.0 | 3.0  | 78.2(7.2)  | 83.1(9.3)  | 96.2(7.1)  | 0.9902 | 1.0 | 3.0  | 102.2(8.1) | 81.8(6.8)  | 88.4(6.1)  |
| Noruron                   | 0.9972 | 0.3 | 1.0  | 91.2(6.4)  | 92.1(4.2)  | 86.3(7.4)  | 0.9920 | 0.3 | 1.0  | 103.4(6.2) | 82.2(5.2)  | 95.5(4.0)  |
| Quinoclamine              | 0.9926 | 0.3 | 1.0  | 103.8(7.1) | 104.1(4.0) | 94.4(5.6)  | 0.9939 | 0.3 | 1.0  | 79.8(9.4)  | 88.4(5.1)  | 97.2(6.3)  |
| Dipropetryn               | 0.9902 | 0.3 | 1.0  | 95.4(6.1)  | 95.3(4.3)  | 94.5(2.4)  | 0.9955 | 0.3 | 1.0  | 105.1(5.1) | 87.8(6.4)  | 88.5(7.4)  |
| Malathion                 | 0.9979 | 0.3 | 1.0  | 102.4(6.2) | 87.4(5.3)  | 101.5(5.6) | 1.0000 | 0.3 | 1.0  | 92.2(6.6)  | 93.1(6.7)  | 103.4(6.2) |
| Thiobencarb               | 0.9903 | 0.5 | 2.0  | 94.3(9.2)  | 84.3(5.4)  | 81.5(7.7)  | 0.9969 | 0.5 | 2.0  | 87.2(7.2)  | 99.1(8.3)  | 94.3(6.2)  |
| Diethofencarb             | 0.9904 | 0.5 | 2.0  | 107.2(8.1) | 106.2(6.5) | 95.2(3.9)  | 0.9927 | 0.5 | 2.0  | 95.4(5.1)  | 87.6(5.1)  | 88.4(9.5)  |
| Phorate sulfoxide         | 0.9925 | 0.3 | 1.0  | 104.3(5.1) | 89.4(4.2)  | 91.7(5.3)  | 0.9937 | 0.3 | 1.0  | 103.1(6.1) | 101.5(4.6) | 93.1(8.2)  |
| Metolachlor               | 0.9986 | 1.0 | 3.0  | 74.2(6.4)  | 87.2(7.4)  | 101.4(4.3) | 0.9991 | 3.0 | 10.0 | 76.4(4.2)  | 93.4(4.1)  | 103.3(8.1) |
| Fenpropimorph             | 0.9916 | 0.3 | 1.0  | 101.4(6.1) | 109.4(9.1) | 82.55(6.1) | 0.9908 | 0.3 | 1.0  | 79.5(9.4)  | 80.5(7.7)  | 86.3(5.5)  |
| Cyanazine                 | 0.9935 | 0.3 | 1.0  | 105.3(8.1) | 76.5(8.1)  | 81.0(7.3)  | 0.9945 | 0.3 | 1.0  | 102.1(9.3) | 95.5(6.1)  | 93.2(9.2)  |
| Chlorpyrifos              | 0.9989 | 0.3 | 1.0  | 94.5(7.2)  | 110.2(8.1) | 107.2(5.8) | 0.9985 | 0.5 | 2.0  | 95.1(6.3)  | 98.4(7.5)  | 97.2(5.2)  |
| Parathion                 | 0.9942 | 1.0 | 3.0  | 107.1(7.5) | 87.3(7.4)  | 97.2(6.2)  | 0.9904 | 1.0 | 3.0  | 91.4(4.5)  | 92.3(6.3)  | 105.1(7.1) |
| Flufenacet                | 0.9978 | 1.0 | 3.0  | 101.3(5.2) | 79.2(9.1)  | 96.5(7.8)  | 0.9981 | 1.0 | 3.0  | 106.6(8.3) | 104.1(7.6) | 102.1(5.2) |
| Rabenzazol                | 0.9941 | 0.5 | 2.0  | 96.5(5.5)  | 83.4(9.2)  | 80.2(9.1)  | 0.9991 | 0.5 | 2.0  | 94.1(8.3)  | 95.3(6.5)  | 93.4(9.3)  |
| 4,4'-Dichlorobenzophenone | 0.9902 | 1.0 | 3.0  | 104.3(7.4) | 80.5(9.6)  | 95.4(5.2)  | 0.9951 | 1.0 | 3.0  | 108.6(5.7) | 102.2(5.1) | 109.2(7.3) |
| Triadimefon               | 0.9927 | 0.3 | 1.0  | 107.4(7.4) | 85.5(9.3)  | 96.4(5.5)  | 0.9901 | 0.3 | 1.0  | 79.4(10.1) | 103.1(7.3) | 104.1(7.2) |
| Chlorthal-dimethyl        | 0.9945 | 1.0 | 3.0  | 95.1(6.3)  | 93.2(9.1)  | 106.3(9.1) | 0.9955 | 1.0 | 3.0  | 83.4(9.1)  | 79.4(9.3)  | 94.5(6.4)  |
| Dicapthon                 | 0.9980 | 0.5 | 2.0  | 89.1(8.2)  | 74.3(9.4)  | 96.2(8.3)  | 0.9967 | 0.5 | 2.0  | 82.8(8.6)  | 105.4(9.1) | 102.5(9.6) |
| Isofenphos-oxon           | 0.9939 | 0.5 | 2.0  | 92.4(6.5)  | 75.6(9.7)  | 107.5(6.6) | 0.9968 | 0.5 | 2.0  | 84.1(7.2)  | 94.3(4.4)  | 84.8(6.9)  |
| Isocarbophos              | 0.9924 | 0.5 | 2.0  | 85.0(7.1)  | 107.2(9.3) | 117.2(7.1) | 0.9929 | 0.5 | 2.0  | 93.7(9.2)  | 118.1(8.4) | 123.4(9.5) |

|                    |        |     |      |            |            |            |        |     |      |            |            |            |
|--------------------|--------|-----|------|------------|------------|------------|--------|-----|------|------------|------------|------------|
| Tetraconazole      | 0.9939 | 0.5 | 2.0  | 95.4(6.1)  | 80.2(9.4)  | 92.1(9.2)  | 0.9945 | 0.5 | 2.0  | 111.6(7.7) | 103.8(8.9) | 105.1(7.4) |
| Isobenzan          | 0.9973 | 1.0 | 3.0  | 94.3(9.4)  | 79.5(9.6)  | 107.4(8.5) | 0.9990 | 10  | 3.0  | 97.2(9.1)  | 94.2(9.3)  | 84.7(8.2)  |
| Flurochloridone    | 0.9943 | 1.0 | 3.0  | 84.6(7.3)  | 75.8(9.2)  | 106.6(7.7) | 0.9903 | 3.0 | 10.0 | 101.3(5.3) | 84.4(9.5)  | 94.0(8.1)  |
| Fenson             | 0.9976 | 0.3 | 1.0  | 90.5(8.4)  | 99.5(9.1)  | 96.9(7.2)  | 0.9971 | 0.3 | 1.0  | 85.5(4.6)  | 90.7(8.8)  | 105.2(4.3) |
| Pyracarbolid       | 0.9949 | 0.5 | 2.0  | 105.3(7.1) | 81.2(9.5)  | 98.6(7.7)  | 0.9995 | 0.5 | 2.0  | 97.5(9.2)  | 103.4(8.5) | 106.5(7.4) |
| Dodemorph          | 0.9925 | 1.0 | 3.0  | 92.5(6.6)  | 90.4(4.2)  | 94.5(5.2)  | 0.9911 | 3.0 | 10.0 | 81.6(9.5)  | 92.3(6.1)  | 94.5(5.3)  |
| Mgk 264            | 0.9961 | 0.3 | 1.0  | 93.4(6.1)  | 94.2(4.5)  | 100.2(6.3) | 0.9949 | 0.3 | 1.0  | 90.4(4.3)  | 97.2(5.3)  | 96.9(6.2)  |
| Butralin           | 0.9909 | 3.0 | 10.0 | 103.4(4.5) | 75.6(9.7)  | 107.9(8.1) | 0.9988 | 3.0 | 10.0 | 94.5(6.6)  | 83.7(8.8)  | 84.2(8.3)  |
| Carbaryl           | 0.9940 | 0.3 | 1.0  | 104.2(7.3) | 87.4(8.2)  | 104.5(7.1) | 0.9931 | 0.3 | 1.0  | 84.5(8.4)  | 95.3(8.2)  | 101.4(5.3) |
| Diphenamid         | 0.9958 | 0.5 | 2.0  | 109.5(7.6) | 92.7(4.8)  | 96.9(8.0)  | 0.9960 | 0.5 | 2.0  | 87.5(4.6)  | 104.7(5.8) | 93.3(8.2)  |
| Pirimiphos-ethyl   | 0.9997 | 1.0 | 3.0  | 97.4(9.5)  | 84.6(9.7)  | 93.1(7.3)  | 0.9960 | 1.0 | 3.0  | 83.5(4.2)  | 103.3(7.3) | 108.8(9.3) |
| Isodrin            | 0.9908 | 0.3 | 1.0  | 101.1(4.3) | 94.4(6.3)  | 103.1(4.2) | 0.9990 | 0.5 | 2.0  | 102.3(9.6) | 94.4(7.2)  | 95.5(4.2)  |
| Aldrin             | 0.9915 | 1.0 | 3.0  | 85.3(4.4)  | 84.5(8.1)  | 105.5(7.2) | 0.9990 | 1.0 | 3.0  | 96.4(7.1)  | 92.5(8.3)  | 107.3(5.2) |
| Isopropalin        | 0.9983 | 0.5 | 2.0  | 94.2(8.2)  | 97.1(4.4)  | 113.4(7.2) | 0.9976 | 0.5 | 2.0  | 98.2(7.3)  | 95.8(6.6)  | 108.6(8.3) |
| Cyprodinil         | 0.9953 | 0.3 | 1.0  | 104.5(4.4) | 83.5(5.3)  | 97.3(9.1)  | 0.9931 | 0.3 | 1.0  | 78.5(7.2)  | 104.1(4.4) | 109.4(9.5) |
| Isofenphos-methyl  | 0.9913 | 0.5 | 2.0  | 92.3(8.2)  | 102.4(9.4) | 101.3(4.4) | 0.9912 | 0.5 | 2.0  | 97.5(9.2)  | 92.5(8.4)  | 95.3(6.4)  |
| Octachlorostyrene  | 0.9922 | 0.3 | 1.0  | 107.5(9.4) | 96.5(7.1)  | 88.2(4.5)  | 0.9958 | 0.3 | 1.0  | 102.4(8.1) | 103.3(8.5) | 88.3(4.2)  |
| Metazachlor        | 0.9930 | 0.5 | 2.0  | 92.3(7.4)  | 98.4(7.2)  | 94.2(8.2)  | 0.9979 | 0.5 | 2.0  | 104.2(7.3) | 96.3(7.1)  | 95.4(6.3)  |
| Dimethametryn      | 0.9960 | 0.3 | 1.0  | 103.5(9.5) | 78.4(9.1)  | 80.2(7.4)  | 0.9906 | 0.3 | 1.0  | 114.1(6.4) | 113.5(9.1) | 92.2(7.3)  |
| Pendimethalin      | 0.9924 | 3.0 | 10.0 | 110.3(8.1) | 97.2(9.4)  | 99.3(6.4)  | 0.9963 | 3.0 | 10.0 | 92.9(9.2)  | 113.1(8.2) | 96.3(7.3)  |
| Disulfoton-sulfone | 0.9962 | 1.0 | 3.0  | 80.2(9.2)  | 72.8(9.2)  | 92.1(9.1)  | 0.9926 | 1.0 | 3.0  | 102.3(4.2) | 121.3(9.2) | 99.3(8.3)  |
| Phorate sulfone    | 0.9995 | 0.5 | 2.0  | 95.2(6.3)  | 90.4(9.5)  | 88.6(8.2)  | 0.9998 | 0.5 | 2.0  | 87.8(4.4)  | 97.9(6.3)  | 77.6(10.4) |
| Terbufos sulfone   | 0.9939 | 1.0 | 3.0  | 96.5(5.4)  | 80.3(4.3)  | 102.4(8.2) | 0.9948 | 1.0 | 3.0  | 95.4(6.7)  | 108.5(9.6) | 109.5(9.6) |
| Paclobutrazol      | 0.9958 | 3.0 | 10.0 | 95.5(8.6)  | 92.3(8.5)  | 100.5(5.2) | 0.9963 | 3.0 | 10.0 | 89.6(7.5)  | 111.4(6.3) | 95.5(9.0)  |
| Penconazole        | 0.9917 | 1.0 | 3.0  | 81.4(4.4)  | 93.5(8.6)  | 80.4(9.8)  | 0.9953 | 3.0 | 10.0 | 95.4(6.2)  | 110.3(4.6) | 86.7(6.8)  |



|                      |        |     |      |            |            |            |        |     |      |            |             |            |
|----------------------|--------|-----|------|------------|------------|------------|--------|-----|------|------------|-------------|------------|
| Chlozolate           | 0.9969 | 3.0 | 10.0 | 95.1(6.3)  | 97.2(7.4)  | 99.3(9.1)  | 0.9902 | 3.0 | 10.0 | 92.7(7.8)  | 113.1(6.3)  | 96.5(8.6)  |
| Pyrifeno             | 0.9926 | 3.0 | 10.0 | 78.8(9.6)  | 78.4(6.3)  | 84.5(6.4)  | 0.9969 | 3.0 | 10.0 | 81.6(6.7)  | 82.5(8.2)   | 82.8(7.2)  |
| Tolylflu             | 0.9909 | 3.0 | 10.0 | 115.5(9.2) | 113.4(8.9) | 104.4(7.5) | 0.9915 | 3.0 | 10.0 | 105.1(7.4) | 108.5(8.2)  | 108.1(8.2) |
| Fosthiaz             | 0.9906 | 1.0 | 3.0  | 82.8(5.1)  | 89.3(2.2)  | 92.3(6.2)  | 0.9916 | 3.0 | 10.0 | 83.3(3.1)  | 82.4(5.2)   | 89.2(5.3)  |
| Phosfolan            | 0.9985 | 1.0 | 3.0  | 88.2(8.4)  | 82.3(9.3)  | 95.3(7.1)  | 0.9960 | 1.0 | 3.0  | 103.4(7.1) | 81.6(6.6)   | 93.2(6.1)  |
| Allethrin            | 0.9924 | 0.3 | 1.0  | 92.5(6.6)  | 93.5(5.4)  | 86.7(7.5)  | 0.9965 | 0.3 | 1.0  | 103.2(6.2) | 84.5(6.4)   | 95.3(4.5)  |
| Isofenphos           | 0.9924 | 0.3 | 1.0  | 105.5(7.3) | 105.2(4.4) | 94.5(5.3)  | 0.9918 | 0.3 | 1.0  | 79.8(8.2)  | 88.4(7.1)   | 98.5(7.2)  |
| Captan               | 0.9999 | 0.3 | 1.0  | 95.3(6.1)  | 95.6(4.4)  | 94.5(4.6)  | 0.9963 | 0.3 | 1.0  | 105.6(8.1) | 88.2(6.4)   | 88.5(7.2)  |
| Fipronil             | 0.9985 | 0.3 | 1.0  | 102.3(7.4) | 87.5(7.4)  | 101.2(5.5) | 0.9916 | 0.3 | 1.0  | 92.5(6.2)  | 93.4(6.4)   | 103.1(8.3) |
| Diclocymet           | 0.9916 | 0.5 | 2.0  | 93.2(9.2)  | 84.1(6.2)  | 81.2(7.3)  | 0.9970 | 0.5 | 2.0  | 85.3(7.2)  | 98.3(8.4)   | 93.2(7.3)  |
| Quinalphos           | 0.9908 | 0.5 | 2.0  | 106.1(8.3) | 106.1(6.4) | 94.3(5.1)  | 0.9981 | 0.5 | 2.0  | 95.8(6.2)  | 87.3(6.4)   | 88.1(9.2)  |
| Phenthoate           | 0.9927 | 0.3 | 1.0  | 104.5(7.1) | 89.4(5.2)  | 91.6(6.3)  | 0.9914 | 0.5 | 2.0  | 103.3(9.5) | 102.1(6.3)  | 93.5(8.3)  |
| Triadimenol          | 0.9951 | 1.0 | 3.0  | 78.2(6.3)  | 87.5(7.2)  | 101.4(5.2) | 0.9904 | 3.0 | 10.0 | 72.8(6.2)  | 93.2(6.1)   | 103.5(8.4) |
| Dinobuton            | 0.9974 | 0.3 | 1.0  | 101.3(7.2) | 108.3(9.2) | 82.5(8.2)  | 0.9949 | 0.3 | 1.0  | 79.9(9.6)  | 80.1(9.4)   | 86.9(5.3)  |
| Furalaxyl            | 0.9971 | 0.3 | 1.0  | 105.3(8.2) | 76.8(9.1)  | 80.5(9.3)  | 0.9995 | 0.3 | 1.0  | 103.5(9.2) | 95.2(6.1)   | 93.4(8.2)  |
| Crotoxyphos          | 0.9992 | 0.3 | 1.0  | 94.5(7.1)  | 112.6(8.2) | 108.6(5.1) | 0.9941 | 0.5 | 2.0  | 95.4(6.4)  | 98.4(8.2)   | 97.7(5.3)  |
| Procyimidone         | 0.9975 | 1.0 | 3.0  | 108.5(7.1) | 87.4(7.3)  | 97.5(8.1)  | 0.9915 | 1.0 | 3.0  | 91.5(4.9)  | 92.6(6.2)   | 105.3(8.1) |
| Chlorbenside         | 0.9966 | 1.0 | 3.0  | 101.2(6.2) | 79.1(9.1)  | 96.7(7.2)  | 0.9962 | 1.0 | 3.0  | 107.4(9.6) | 105.5(7.1)  | 102.2(7.2) |
| Chlorflurenol-methyl | 0.9934 | 0.5 | 2.0  | 96.2(5.2)  | 83.3(9.1)  | 80.7(9.1)  | 0.9955 | 0.5 | 2.0  | 94.8(8.4)  | 96.4(6.2)   | 93.1(7.2)  |
| Chlordane            | 0.9969 | 1.0 | 3.0  | 104.1(7.3) | 80.2(8.7)  | 95.8(6.2)  | 0.9970 | 1.0 | 3.0  | 108.5(6.3) | 102.5(9.1)  | 109.3(7.2) |
| Methidathion         | 0.9919 | 3.0 | 10.0 | 75.4(9.1)  | 78.0(6.2)  | 82.3(5.8)  | 0.9956 | 3.0 | 10.0 | 73.5(6.2)  | 81.4(9.2)   | 82.1(7.1)  |
| Haloxyp-methyl       | 0.9918 | 3.0 | 10.0 | 113.8(6.1) | 114.2(9.3) | 104.1(6.3) | 0.9993 | 3.0 | 10.0 | 105.8(6.2) | 109.4(10.2) | 119.1(9.5) |
| Bromophos-ethyl      | 0.9900 | 1.0 | 3.0  | 74.2(8.2)  | 78.3(8.2)  | 84.3(5.2)  | 0.9970 | 3.0 | 10.0 | 74.3(9.1)  | 76.4(7.2)   | 79.7(4.3)  |
| Procyazine           | 0.9904 | 1.0 | 3.0  | 78.2(7.2)  | 83.1(9.3)  | 96.2(7.0)  | 0.9932 | 1.0 | 3.0  | 102.2(8.1) | 81.8(6.8)   | 88.4(6.1)  |
| Disulfoton-sulfoxide | 0.9908 | 0.3 | 1.0  | 94.2(6.9)  | 92.1(4.2)  | 86.3(7.1)  | 0.9909 | 0.3 | 1.0  | 103.4(6.2) | 84.2(5.2)   | 95.5(4.0)  |

|                                           |        |     |     |            |            |            |        |     |      |            |            |            |
|-------------------------------------------|--------|-----|-----|------------|------------|------------|--------|-----|------|------------|------------|------------|
| Tetrachlorvinphos                         | 0.9974 | 0.3 | 1.0 | 103.5(6.1) | 104.1(4.0) | 94.4(5.3)  | 0.9991 | 0.3 | 1.0  | 79.8(9.2)  | 88.4(5.1)  | 97.2(6.3)  |
| Endosulfan                                | 0.9960 | 0.3 | 1.0 | 95.4(6.1)  | 95.3(4.3)  | 94.5(4.6)  | 0.9943 | 0.3 | 1.0  | 104.1(5.1) | 88.8(6.4)  | 88.5(7.4)  |
| Mepanipyrin                               | 0.9990 | 0.3 | 1.0 | 102.3(3.2) | 87.4(5.3)  | 101.5(5.1) | 0.9968 | 0.3 | 1.0  | 92.2(6.4)  | 93.1(6.7)  | 103.4(6.2) |
| Butachlor                                 | 0.9950 | 0.5 | 2.0 | 94.8(9.2)  | 84.3(5.4)  | 81.5(7.4)  | 0.9985 | 0.5 | 2.0  | 87.2(7.2)  | 99.1(8.3)  | 94.3(6.2)  |
| Ditalimfos                                | 0.9952 | 0.5 | 2.0 | 105.2(8.1) | 106.2(6.5) | 95.2(3.1)  | 0.9935 | 0.5 | 2.0  | 95.4(5.1)  | 87.6(3.3)  | 88.4(9.5)  |
| TCMTB                                     | 0.9986 | 0.3 | 1.0 | 104.3(5.1) | 89.4(4.2)  | 91.7(4.3)  | 0.9943 | 0.5 | 2.0  | 103.1(6.1) | 102.5(4.2) | 93.1(8.2)  |
| trans-Nonachlor                           | 0.9912 | 1.0 | 3.0 | 114.2(6.4) | 117.2(7.4) | 101.4(5.3) | 0.9955 | 3.0 | 10.0 | 112.8(4.2) | 113.4(5.1) | 113.3(8.1) |
| Chlorfenson                               | 0.9992 | 0.3 | 1.0 | 101.4(6.1) | 109.4(9.1) | 82.55(8.1) | 0.9973 | 0.3 | 1.0  | 79.5(9.4)  | 80.5(8.7)  | 86.3(5.5)  |
| Fenamiphos                                | 0.9912 | 0.3 | 1.0 | 105.3(5.1) | 76.5(8.1)  | 81.0(8.3)  | 0.9924 | 0.3 | 1.0  | 102.1(9.3) | 95.5(6.2)  | 93.2(9.2)  |
| Picoxystrobin                             | 0.9919 | 0.3 | 1.0 | 94.5(7.2)  | 110.2(8.1) | 107.2(5.2) | 0.9912 | 0.5 | 2.0  | 95.1(6.3)  | 98.4(7.2)  | 97.2(5.2)  |
| Napropamide                               | 0.9972 | 1.0 | 3.0 | 108.1(7.5) | 87.3(7.4)  | 97.2(6.1)  | 1.0000 | 1.0 | 3.0  | 91.4(4.5)  | 92.3(6.5)  | 105.1(7.1) |
| Hexaconazole                              | 0.9943 | 1.0 | 3.0 | 103.3(5.2) | 79.2(9.1)  | 96.5(7.3)  | 0.9933 | 1.0 | 3.0  | 106.3(8.3) | 104.1(7.2) | 102.1(5.2) |
| Flutolanil                                | 0.9906 | 0.5 | 2.0 | 96.5(5.5)  | 83.4(9.2)  | 80.2(9.2)  | 0.9922 | 0.5 | 2.0  | 94.1(8.3)  | 95.3(6.1)  | 93.4(9.3)  |
| Prothiophos                               | 0.9928 | 0.3 | 1.0 | 105.3(7.4) | 80.5(9.6)  | 95.4(5.2)  | 0.9933 | 1.0 | 3.0  | 108.6(5.3) | 102.2(5.1) | 109.2(7.3) |
| Isoprothiolane                            | 0.9914 | 0.3 | 1.0 | 106.4(7.4) | 85.5(9.3)  | 96.4(5.5)  | 0.9928 | 0.3 | 1.0  | 79.4(10.1) | 103.1(7.3) | 104.1(7.2) |
| Profenofos                                | 0.9914 | 1.0 | 3.0 | 95.1(4.3)  | 93.2(9.1)  | 106.3(9.1) | 0.9936 | 1.0 | 3.0  | 83.4(9.2)  | 79.4(9.3)  | 94.5(6.4)  |
| tricyclazole                              | 0.9906 | 0.5 | 2.0 | 89.1(8.2)  | 74.3(9.4)  | 96.2(8.3)  | 0.9963 | 0.5 | 2.0  | 82.8(8.9)  | 105.0(9.1) | 102.5(9.6) |
| Pretilachlor                              | 0.9986 | 0.5 | 2.0 | 92.4(6.5)  | 75.6(9.7)  | 107.5(6.6) | 0.9916 | 0.5 | 2.0  | 84.1(7.2)  | 94.3(4.4)  | 84.8(6.9)  |
| Dieldrin                                  | 0.9965 | 0.5 | 2.0 | 85.0(7.1)  | 107.2(9.3) | 117.2(9.1) | 0.9968 | 0.5 | 2.0  | 93.7(9.8)  | 118.1(8.4) | 123.4(9.5) |
| Oxadiazon                                 | 0.9982 | 0.5 | 2.0 | 95.4(6.1)  | 80.2(9.4)  | 92.1(9.2)  | 0.9922 | 0.5 | 2.0  | 111.6(7.7) | 103.8(8.9) | 105.1(7.4) |
| Iprovalicarb                              | 0.9984 | 1.0 | 3.0 | 94.3(7.4)  | 73.5(9.6)  | 107.4(8.5) | 0.9970 | 10  | 3.0  | 97.0(9.1)  | 94.2(9.3)  | 84.7(8.2)  |
| Carboxin                                  | 0.9922 | 1.0 | 3.0 | 84.6(8.3)  | 75.8(9.2)  | 106.6(8.7) | 0.9938 | 3.0 | 10.0 | 101.3(5.0) | 84.4(9.5)  | 94.0(8.1)  |
| Myclobutanil                              | 0.9934 | 0.3 | 1.0 | 122.5(8.4) | 121.5(9.1) | 121.9(7.2) | 0.9980 | 0.3 | 1.0  | 123.5(4.6) | 120.7(8.8) | 122.2(4.3) |
| p,p'-Dichlorodiphenyldic<br>hloroethylene | 0.9951 | 0.5 | 2.0 | 105.3(7.1) | 81.2(9.5)  | 98.6(7.7)  | 0.9958 | 0.5 | 2.0  | 97.5(9.2)  | 103.4(8.5) | 106.5(7.4) |

|                                         |        |     |      |            |            |            |        |     |      |            |            |             |
|-----------------------------------------|--------|-----|------|------------|------------|------------|--------|-----|------|------------|------------|-------------|
| Buprofezin                              | 0.9923 | 1.0 | 3.0  | 92.5(6.6)  | 90.4(4.2)  | 94.5(5.2)  | 0.9920 | 3.0 | 10.0 | 81.6(9.2)  | 92.3(6.1)  | 94.5(5.3)   |
| Imazalil                                | 0.9965 | 0.3 | 1.0  | 93.4(6.1)  | 94.2(4.5)  | 100.2(6.3) | 0.9994 | 0.3 | 1.0  | 90.4(4.3)  | 97.2(5.3)  | 96.9(6.2)   |
| Flusilazole                             | 0.9995 | 3.0 | 10.0 | 103.4(4.5) | 75.6(9.7)  | 107.9(8.1) | 0.9955 | 3.0 | 10.0 | 94.5(6.6)  | 83.7(9.8)  | 84.2(8.3)   |
| Methoprotryne                           | 0.9962 | 0.3 | 1.0  | 104.2(7.3) | 87.4(8.2)  | 104.5(7.1) | 0.9971 | 0.3 | 1.0  | 84.5(8.7)  | 95.3(8.2)  | 101.4(5.3)  |
| Azaconazole                             | 0.9978 | 0.5 | 2.0  | 109.5(7.6) | 92.7(4.8)  | 96.9(8.0)  | 0.9914 | 0.5 | 2.0  | 87.5(4.6)  | 104.7(5.8) | 93.3(8.2)   |
| Bupirimate                              | 0.9969 | 1.0 | 3.0  | 97.5(9.5)  | 84.6(9.7)  | 93.1(7.3)  | 0.9919 | 1.0 | 3.0  | 83.5(4.2)  | 103.3(7.3) | 108.8(9.3)  |
| Imazamethabenz-methyl                   | 0.9939 | 0.3 | 1.0  | 101.1(4.3) | 94.4(6.3)  | 103.1(4.2) | 0.9906 | 0.5 | 2.0  | 102.3(9.2) | 94.4(7.2)  | 95.5(4.2)   |
| Kresoxim-methyl                         | 0.9956 | 1.0 | 3.0  | 87.3(4.4)  | 84.5(8.1)  | 104.5(7.2) | 0.9994 | 1.0 | 3.0  | 96.4(7.1)  | 92.5(8.3)  | 107.3(5.2)  |
| Metamitron                              | 0.9999 | 0.5 | 2.0  | 94.2(8.2)  | 97.1(4.4)  | 113.4(7.2) | 0.9989 | 0.5 | 2.0  | 98.2(7.3)  | 95.8(6.6)  | 108.6(8.3)  |
| Isoxathion                              | 0.9921 | 0.3 | 1.0  | 106.5(4.4) | 83.5(5.3)  | 97.3(9.1)  | 0.9960 | 0.3 | 1.0  | 78.5(9.2)  | 104.1(4.4) | 109.4(9.5)  |
| Aramite                                 | 0.9942 | 0.5 | 2.0  | 92.3(5.2)  | 102.4(9.4) | 101.3(4.4) | 0.9995 | 0.5 | 2.0  | 97.5(9.2)  | 92.5(8.4)  | 95.3(6.4)   |
| Nitrofen                                | 0.9951 | 0.3 | 1.0  | 107.5(8.4) | 96.5(7.1)  | 88.2(4.5)  | 0.9976 | 0.3 | 1.0  | 72.4(9.1)  | 103.3(9.5) | 88.3(4.2)   |
| Endrin                                  | 0.9926 | 0.5 | 2.0  | 96.3(7.4)  | 98.4(7.2)  | 94.2(8.2)  | 0.9990 | 0.5 | 2.0  | 104.2(7.3) | 96.3(7.1)  | 95.4(6.3)   |
| Endrin aldehyde                         | 0.9923 | 0.3 | 1.0  | 102.5(9.5) | 78.4(9.1)  | 80.2(7.4)  | 0.9966 | 0.3 | 1.0  | 114.1(6.4) | 113.5(9.1) | 92.2(7.3)   |
| Ancymidol                               | 0.9919 | 0.5 | 2.0  | 110.3(8.1) | 97.2(9.4)  | 99.3(6.4)  | 0.9902 | 3.0 | 10.0 | 92.9(9.2)  | 113.1(8.2) | 96.3(7.3)   |
| Perthan                                 | 0.9916 | 1.0 | 3.0  | 86.2(9.2)  | 72.8(9.2)  | 92.1(9.1)  | 0.9978 | 1.0 | 3.0  | 101.3(4.2) | 122.3(9.2) | 99.3(8.3)   |
| Chlorfenapyr                            | 0.9963 | 0.5 | 2.0  | 113.1(6.3) | 110.4(9.5) | 113.6(8.2) | 0.9932 | 0.5 | 2.0  | 110.8(4.4) | 112.9(6.3) | 111.6(10.3) |
| Chloropropylate                         | 0.9988 | 1.0 | 3.0  | 96.5(5.4)  | 80.3(4.3)  | 102.4(8.2) | 0.9987 | 1.0 | 3.0  | 95.4(6.7)  | 108.5(9.6) | 109.5(9.6)  |
| Chlorobenzilate                         | 0.9948 | 3.0 | 10.0 | 95.5(7.6)  | 92.3(8.5)  | 100.5(5.2) | 0.9949 | 3.0 | 10.0 | 88.6(7.5)  | 111.4(6.3) | 95.5(9.0)   |
| Fenthion sulfoxide                      | 0.9977 | 1.0 | 3.0  | 81.4(8.4)  | 93.5(8.6)  | 80.4(9.8)  | 0.9912 | 3.0 | 10.0 | 95.4(6.2)  | 110.3(5.6) | 86.7(6.8)   |
| Diniconazole                            | 0.9952 | 3.0 | 10.0 | 95.1(6.3)  | 97.2(7.4)  | 99.3(9.1)  | 0.9951 | 3.0 | 10.0 | 92.7(7.8)  | 113.1(8.3) | 96.5(8.6)   |
| Flamprop-isopropyl                      | 0.9950 | 1.0 | 3.0  | 108.6(9.6) | 108.4(6.3) | 104.5(6.4) | 0.9975 | 3.0 | 10.0 | 101.6(6.7) | 102.5(9.2) | 102.8(7.2)  |
| p,p'-Dichlorodiphenyldic<br>hloroethane | 0.9919 | 3.0 | 10.0 | 75.5(9.2)  | 73.4(8.9)  | 74.4(7.5)  | 0.9999 | 3.0 | 10.0 | 75.1(7.4)  | 78.5(8.2)  | 78.1(8.2)   |

|                                          |        |     |      |            |            |            |        |     |      |            |             |            |
|------------------------------------------|--------|-----|------|------------|------------|------------|--------|-----|------|------------|-------------|------------|
| Aclonifen                                | 0.9916 | 1.0 | 3.0  | 82.7(5.1)  | 89.3(6.2)  | 92.3(6.2)  | 0.9980 | 3.0 | 10.0 | 85.3(3.1)  | 82.4(5.2)   | 89.2(5.3)  |
| o,p'-Dichlorodiphenyltri<br>chloroethane | 0.9965 | 1.0 | 3.0  | 88.2(8.4)  | 82.3(9.3)  | 95.3(7.1)  | 0.9967 | 1.0 | 3.0  | 103.4(7.1) | 81.6(6.8)   | 93.2(6.1)  |
| Oxadixyl                                 | 0.9914 | 0.3 | 1.0  | 92.5(5.6)  | 93.5(5.4)  | 86.7(7.5)  | 0.9999 | 0.3 | 1.0  | 103.2(6.2) | 84.5(6.5)   | 95.3(4.5)  |
| Ethion                                   | 0.9912 | 0.3 | 1.0  | 105.5(7.3) | 105.2(4.4) | 94.5(5.3)  | 0.9998 | 0.3 | 1.0  | 79.8(8.2)  | 88.4(7.1)   | 98.5(7.2)  |
| Mepronil                                 | 0.9957 | 0.3 | 1.0  | 95.3(6.1)  | 95.6(4.4)  | 94.5(4.6)  | 0.9926 | 0.3 | 1.0  | 105.6(8.1) | 88.2(6.4)   | 88.5(7.2)  |
| Triazophos                               | 0.9961 | 0.3 | 1.0  | 102.3(8.4) | 87.5(7.4)  | 101.2(5.5) | 0.9930 | 0.3 | 1.0  | 92.5(6.2)  | 93.4(6.4)   | 103.1(8.3) |
| Azamethiphos                             | 0.9963 | 0.5 | 2.0  | 93.9(9.2)  | 84.1(6.2)  | 81.2(7.3)  | 0.9970 | 0.5 | 2.0  | 85.3(7.2)  | 99.3(8.4)   | 93.2(7.3)  |
| Ofurace                                  | 0.9913 | 0.5 | 2.0  | 106.7(8.3) | 106.1(6.4) | 94.3(5.1)  | 0.9980 | 0.5 | 2.0  | 95.2(6.2)  | 87.3(6.4)   | 88.1(9.2)  |
| Carbophenothion                          | 0.9988 | 0.3 | 1.0  | 104.5(7.1) | 89.4(5.2)  | 91.4(6.3)  | 0.9926 | 0.5 | 2.0  | 103.3(9.3) | 102.1(6.3)  | 93.5(8.3)  |
| Benalaxyl                                | 0.9929 | 1.0 | 3.0  | 118.2(6.3) | 117.5(7.2) | 101.4(5.2) | 0.9949 | 3.0 | 10.0 | 102.9(6.2) | 103.2(6.1)  | 113.5(8.4) |
| Tepaloxymdim                             | 0.9914 | 0.3 | 1.0  | 101.3(6.2) | 108.3(9.2) | 82.5(8.2)  | 0.9999 | 0.3 | 1.0  | 79.9(9.7)  | 80.1(9.4)   | 86.9(5.3)  |
| Diofenolan                               | 0.9978 | 0.3 | 1.0  | 105.3(8.2) | 76.8(9.1)  | 80.5(9.3)  | 0.9905 | 0.3 | 1.0  | 103.5(9.2) | 95.2(6.1)   | 93.4(8.2)  |
| Cyanofenphos                             | 0.9987 | 0.3 | 1.0  | 94.5(9.1)  | 112.6(8.2) | 108.6(5.1) | 0.9975 | 0.5 | 2.0  | 95.4(6.2)  | 98.5(8.2)   | 97.7(5.3)  |
| Edifenphos                               | 0.9909 | 1.0 | 3.0  | 108.5(7.1) | 87.4(7.3)  | 97.5(8.1)  | 0.9966 | 1.0 | 3.0  | 91.5(4.9)  | 92.6(6.2)   | 105.3(8.1) |
| Quinoxifen                               | 0.9954 | 1.0 | 3.0  | 101.6(6.2) | 79.1(9.1)  | 96.7(7.2)  | 0.9990 | 1.0 | 3.0  | 107.4(9.3) | 105.5(7.1)  | 102.2(7.2) |
| Endosulfan Sulfate                       | 0.9999 | 0.5 | 2.0  | 96.2(5.2)  | 83.3(9.1)  | 80.7(9.1)  | 0.9968 | 0.5 | 2.0  | 94.8(8.4)  | 95.4(6.2)   | 93.1(7.2)  |
| Propiconazol                             | 0.9926 | 1.0 | 3.0  | 102.1(7.3) | 80.2(8.7)  | 95.8(6.2)  | 0.9960 | 1.0 | 3.0  | 108.5(6.3) | 102.5(9.1)  | 109.3(7.2) |
| Norflurazon                              | 0.9997 | 3.0 | 10.0 | 108.4(9.1) | 108.0(6.2) | 102.3(5.4) | 0.9971 | 3.0 | 10.0 | 104.5(5.2) | 101.4(7.2)  | 102.1(7.1) |
| Fenhexamid                               | 0.9934 | 3.0 | 10.0 | 103.4(7.1) | 104.2(9.3) | 104.1(6.5) | 0.9994 | 3.0 | 10.0 | 105.8(6.2) | 109.4(10.2) | 109.1(9.5) |
| p,p'-Dichlorodiphenyltri<br>chloroethane | 0.9905 | 1.0 | 3.0  | 113.2(9.2) | 118.3(8.2) | 114.3(5.3) | 0.9940 | 3.0 | 10.0 | 114.3(9.1) | 116.4(7.2)  | 119.7(4.3) |
| Trifloxystrobin                          | 0.9931 | 1.0 | 3.0  | 78.2(7.2)  | 83.1(9.3)  | 96.2(7.1)  | 0.9949 | 1.0 | 3.0  | 102.2(8.1) | 81.8(6.8)   | 88.4(6.1)  |
| Hexazinone                               | 0.9978 | 0.3 | 1.0  | 91.2(6.4)  | 92.1(4.2)  | 86.3(7.4)  | 0.9925 | 0.3 | 1.0  | 103.4(6.2) | 82.2(5.2)   | 95.5(4.0)  |
| Tebuconazol                              | 0.9946 | 0.3 | 1.0  | 103.8(7.1) | 104.1(4.0) | 94.4(5.6)  | 0.9948 | 0.3 | 1.0  | 79.8(9.4)  | 88.4(5.1)   | 97.2(6.3)  |

|                    |        |     |      |            |            |            |        |     |      |            |            |            |
|--------------------|--------|-----|------|------------|------------|------------|--------|-----|------|------------|------------|------------|
| Chloridazon        | 0.9976 | 0.3 | 1.0  | 95.4(6.1)  | 95.3(4.3)  | 94.5(2.4)  | 0.9995 | 0.3 | 1.0  | 105.1(5.1) | 87.8(6.4)  | 88.5(7.4)  |
| Nuarimol           | 0.9937 | 0.3 | 1.0  | 102.4(6.2) | 87.4(5.3)  | 101.5(5.6) | 0.9980 | 0.3 | 1.0  | 92.2(6.6)  | 93.1(6.7)  | 103.4(6.2) |
| Diclofop-methyl    | 0.9945 | 0.5 | 2.0  | 94.3(9.2)  | 84.3(5.4)  | 81.5(7.7)  | 0.9925 | 0.5 | 2.0  | 87.2(7.2)  | 99.1(8.3)  | 94.3(6.2)  |
| Piperonyl butoxide | 0.9935 | 0.3 | 1.0  | 104.3(5.1) | 89.4(4.2)  | 91.7(5.3)  | 0.9919 | 0.3 | 1.0  | 103.1(6.1) | 101.5(4.6) | 93.1(8.2)  |
| Oxycarboxin        | 0.9968 | 1.0 | 3.0  | 104.2(6.4) | 107.2(7.4) | 101.4(4.3) | 0.9950 | 3.0 | 10.0 | 102.4(4.2) | 103.4(4.1) | 103.3(8.1) |
| Resmethrin         | 0.9968 | 0.3 | 1.0  | 101.4(6.1) | 109.4(9.1) | 82.55(6.1) | 0.9918 | 0.3 | 1.0  | 79.5(9.4)  | 80.5(7.7)  | 86.3(5.5)  |
| Zoxamide           | 0.9992 | 0.3 | 1.0  | 105.3(8.1) | 76.5(8.1)  | 81.0(7.3)  | 0.9942 | 0.3 | 1.0  | 102.1(9.3) | 95.5(6.1)  | 93.2(9.2)  |
| Mefenpyr-diethyl   | 0.9987 | 0.3 | 1.0  | 94.5(7.2)  | 110.2(8.1) | 107.2(5.8) | 0.9991 | 0.5 | 2.0  | 95.1(6.3)  | 98.4(7.5)  | 97.2(5.2)  |
| Benzoylprop-ethyl  | 0.9942 | 1.0 | 3.0  | 107.1(7.5) | 87.3(7.4)  | 97.2(6.2)  | 0.9990 | 1.0 | 3.0  | 91.4(4.5)  | 92.3(6.3)  | 105.1(7.1) |
| Spiromesifen       | 0.9922 | 1.0 | 3.0  | 101.3(5.2) | 79.2(9.1)  | 96.5(7.8)  | 0.9926 | 1.0 | 3.0  | 106.6(8.3) | 104.1(7.6) | 102.1(5.2) |
| Endrin ketone      | 0.9994 | 0.5 | 2.0  | 96.5(5.5)  | 83.4(9.2)  | 80.2(9.1)  | 0.9940 | 0.5 | 2.0  | 94.1(8.3)  | 95.3(6.5)  | 93.4(9.3)  |
| Fenamiphos sulfone | 0.9945 | 1.0 | 3.0  | 104.3(7.4) | 80.5(9.6)  | 95.4(5.2)  | 0.9989 | 1.0 | 3.0  | 108.6(5.7) | 102.2(5.1) | 109.2(7.3) |
| Bromuconazole      | 0.9926 | 0.3 | 1.0  | 107.4(7.4) | 85.5(9.3)  | 96.4(5.5)  | 0.9902 | 0.3 | 1.0  | 79.4(11.1) | 103.1(7.3) | 104.1(7.2) |
| Fenpiclonil        | 0.9942 | 1.0 | 3.0  | 95.1(6.3)  | 93.2(9.1)  | 106.3(9.1) | 0.9968 | 1.0 | 3.0  | 83.4(9.1)  | 79.4(9.3)  | 94.5(6.4)  |
| Phosmet            | 0.9998 | 0.5 | 2.0  | 89.1(8.2)  | 74.3(9.4)  | 96.2(8.3)  | 0.9920 | 0.5 | 2.0  | 82.8(8.6)  | 1054(9.1)  | 102.5(9.6) |
| Bromopropylate     | 0.9964 | 0.5 | 2.0  | 112.4(6.5) | 110.6(9.7) | 113.5(6.6) | 0.9971 | 0.5 | 2.0  | 114.1(7.2) | 114.3(4.4) | 113.8(6.9) |
| Tetramethrin       | 0.9903 | 0.5 | 2.0  | 85.0(7.1)  | 107.2(9.3) | 117.2(7.1) | 0.9932 | 0.5 | 2.0  | 93.7(9.2)  | 118.1(8.4) | 123.4(9.5) |
| Picolinafen        | 0.9962 | 0.5 | 2.0  | 95.4(6.1)  | 80.2(9.4)  | 92.1(9.2)  | 0.9972 | 0.5 | 2.0  | 111.6(7.7) | 103.8(8.9) | 105.1(7.4) |
| Bifenthrin         | 0.9929 | 1.0 | 3.0  | 122.3(9.4) | 120.5(9.6) | 120.4(8.5) | 0.9957 | 10  | 3.0  | 121.3(9.1) | 121.2(9.3) | 120.7(8.2) |
| Piperophos         | 0.9996 | 1.0 | 3.0  | 84.6(7.3)  | 75.8(9.2)  | 106.6(7.7) | 0.9927 | 3.0 | 10.0 | 101.3(5.3) | 84.4(9.5)  | 94.0(8.1)  |
| 4,4'-Methoxychlor  | 0.9914 | 0.3 | 1.0  | 90.5(8.4)  | 99.5(9.1)  | 96.9(7.2)  | 0.9957 | 0.3 | 1.0  | 85.5(4.6)  | 90.7(8.8)  | 105.2(4.3) |
| Bifenazate         | 0.9983 | 0.5 | 2.0  | 105.3(7.1) | 81.2(9.5)  | 98.6(7.7)  | 0.9998 | 0.5 | 2.0  | 97.5(9.2)  | 103.4(8.5) | 106.5(7.4) |
| Fenpropathrin      | 0.9902 | 1.0 | 3.0  | 92.5(6.6)  | 90.4(4.2)  | 94.5(5.2)  | 0.9924 | 3.0 | 10.0 | 81.6(9.5)  | 92.3(6.1)  | 94.5(5.3)  |
| Etoxazole          | 0.9967 | 0.3 | 1.0  | 93.4(6.1)  | 94.2(4.5)  | 100.2(6.3) | 0.9984 | 0.3 | 1.0  | 90.4(4.3)  | 97.2(5.3)  | 96.9(6.2)  |
| Tebufenpyrad       | 0.9908 | 3.0 | 10.0 | 103.4(4.5) | 75.6(9.7)  | 107.9(8.1) | 0.9957 | 3.0 | 10.0 | 94.5(6.6)  | 83.7(8.8)  | 84.2(8.3)  |

|                      |        |     |      |            |            |            |        |     |      |            |            |            |
|----------------------|--------|-----|------|------------|------------|------------|--------|-----|------|------------|------------|------------|
| Fenamidone           | 0.9971 | 0.3 | 1.0  | 104.2(7.3) | 87.4(8.2)  | 104.5(7.1) | 0.9930 | 0.3 | 1.0  | 84.5(8.4)  | 95.3(8.2)  | 101.4(5.3) |
| Dicofol              | 0.9944 | 0.5 | 2.0  | 109.5(7.6) | 92.7(4.8)  | 96.9(8.0)  | 0.9970 | 0.5 | 2.0  | 87.5(4.6)  | 104.7(5.8) | 93.3(8.2)  |
| Metconazole          | 0.9952 | 1.0 | 3.0  | 120.8(9.5) | 122.1(9.7) | 118.1(7.3) | 0.9909 | 1.0 | 3.0  | 113.5(4.2) | 113.3(7.3) | 120.3(9.3) |
| Fenazaquin           | 0.9996 | 0.3 | 1.0  | 101.1(4.3) | 94.4(6.3)  | 103.1(4.2) | 0.9916 | 0.5 | 2.0  | 102.3(9.6) | 94.4(7.2)  | 95.5(4.2)  |
| Tetradifon           | 0.9954 | 1.0 | 3.0  | 85.3(4.4)  | 84.5(8.1)  | 105.5(7.2) | 0.9902 | 1.0 | 3.0  | 96.4(7.1)  | 92.5(8.3)  | 107.3(5.2) |
| Furathiocarb         | 0.9919 | 0.5 | 2.0  | 94.2(8.2)  | 97.1(4.4)  | 113.4(7.2) | 0.9904 | 0.5 | 2.0  | 98.2(7.3)  | 95.8(6.6)  | 108.6(8.3) |
| Phosalone            | 0.9925 | 0.3 | 1.0  | 104.5(4.4) | 83.5(5.3)  | 97.3(9.1)  | 0.9957 | 0.3 | 1.0  | 78.5(7.2)  | 104.1(4.4) | 109.4(9.5) |
| Pyriproxyfen         | 0.9983 | 0.5 | 2.0  | 92.3(8.2)  | 102.4(9.4) | 101.3(4.4) | 0.9926 | 0.5 | 2.0  | 97.5(9.2)  | 92.5(8.4)  | 95.3(6.4)  |
| Mirex                | 0.9904 | 0.3 | 1.0  | 107.5(9.4) | 96.5(7.1)  | 88.2(4.5)  | 0.9903 | 0.3 | 1.0  | 92.4(8.1)  | 103.3(8.5) | 88.3(4.2)  |
| Mefenacet            | 0.9916 | 0.5 | 2.0  | 92.3(7.4)  | 98.4(7.2)  | 94.2(8.2)  | 0.9907 | 0.5 | 2.0  | 104.2(7.3) | 96.3(7.1)  | 95.4(6.3)  |
| Cyhalothrin          | 0.9934 | 0.3 | 1.0  | 103.5(9.5) | 78.4(9.1)  | 80.2(7.4)  | 0.9926 | 0.3 | 1.0  | 114.1(6.4) | 113.5(9.1) | 92.2(7.3)  |
| Tralkoxydim          | 0.9960 | 3.0 | 10.0 | 110.3(8.1) | 97.2(9.4)  | 99.3(6.4)  | 0.9965 | 3.0 | 10.0 | 92.9(9.2)  | 113.1(8.2) | 96.3(7.3)  |
| Fenarimol            | 0.9904 | 1.0 | 3.0  | 80.2(9.2)  | 72.8(9.2)  | 92.1(9.1)  | 0.9932 | 1.0 | 3.0  | 102.3(4.2) | 121.3(9.2) | 99.3(8.3)  |
| Trifenmorph          | 0.9981 | 0.5 | 2.0  | 95.2(6.3)  | 90.4(9.5)  | 88.6(8.2)  | 0.9982 | 0.5 | 2.0  | 87.8(4.4)  | 97.9(6.3)  | 77.6(10.3) |
| Azinphos-ethyl       | 0.9967 | 1.0 | 3.0  | 96.5(5.4)  | 80.3(4.3)  | 102.4(8.2) | 0.9902 | 1.0 | 3.0  | 95.4(6.7)  | 108.5(9.6) | 109.5(9.6) |
| Pyrazophos           | 0.9992 | 3.0 | 10.0 | 95.5(8.6)  | 92.3(8.5)  | 100.5(5.2) | 0.9925 | 3.0 | 10.0 | 89.6(7.5)  | 111.4(6.3) | 95.5(9.0)  |
| Acrinathrin          | 0.9996 | 1.0 | 3.0  | 81.4(4.4)  | 93.5(8.6)  | 80.4(9.8)  | 0.9902 | 3.0 | 10.0 | 95.4(6.2)  | 110.3(4.6) | 86.7(6.8)  |
| Fluoroglycofen-ethyl | 0.9977 | 3.0 | 10.0 | 95.1(6.3)  | 97.2(7.4)  | 99.3(9.1)  | 0.9940 | 3.0 | 10.0 | 92.7(7.8)  | 113.1(6.3) | 96.5(8.6)  |
| Fenoxaprop-ethyl     | 0.9909 | 3.0 | 10.0 | 88.8(9.6)  | 88.4(6.3)  | 84.5(6.4)  | 0.9928 | 3.0 | 10.0 | 91.6(6.7)  | 82.5(8.2)  | 82.8(7.2)  |
| Bitertanol           | 0.9993 | 3.0 | 10.0 | 105.5(9.2) | 103.4(8.9) | 104.4(7.5) | 0.9923 | 3.0 | 10.0 | 105.1(7.4) | 108.5(8.2) | 108.1(8.2) |
| Spirodiclofen        | 0.9923 | 1.0 | 3.0  | 82.8(5.1)  | 89.3(2.2)  | 92.3(6.2)  | 0.9962 | 3.0 | 10.0 | 83.3(3.1)  | 82.4(5.2)  | 89.2(5.3)  |
| Permethrin           | 0.9995 | 1.0 | 3.0  | 88.2(8.4)  | 82.3(9.3)  | 95.3(7.1)  | 0.9913 | 1.0 | 3.0  | 103.4(7.1) | 81.6(6.6)  | 93.2(6.1)  |
| Pyridaben            | 0.9987 | 0.3 | 1.0  | 92.5(6.6)  | 93.5(5.4)  | 86.7(7.5)  | 0.9953 | 0.3 | 1.0  | 103.2(6.2) | 84.5(6.4)  | 95.3(4.5)  |
| Fluquinconazole      | 0.9972 | 0.3 | 1.0  | 105.5(7.3) | 105.2(4.4) | 94.5(5.3)  | 0.9988 | 0.3 | 1.0  | 79.8(8.2)  | 88.4(7.1)  | 98.5(7.2)  |
| Coumaphos            | 0.9987 | 0.3 | 1.0  | 95.3(6.1)  | 95.6(4.4)  | 94.5(4.6)  | 0.9923 | 0.3 | 1.0  | 105.6(8.1) | 88.2(6.4)  | 88.5(7.2)  |

|                  |        |     |      |            |            |            |        |     |      |            |             |            |
|------------------|--------|-----|------|------------|------------|------------|--------|-----|------|------------|-------------|------------|
| Prochloraz       | 0.9997 | 0.3 | 1.0  | 102.3(5.4) | 87.5(7.4)  | 101.2(5.5) | 0.9978 | 0.3 | 1.0  | 92.5(6.2)  | 93.4(6.4)   | 103.1(8.3) |
| Butafenacil      | 0.9977 | 0.5 | 2.0  | 93.2(7.2)  | 84.1(6.2)  | 81.2(7.3)  | 0.9997 | 0.5 | 2.0  | 85.3(7.2)  | 98.3(8.4)   | 93.2(7.3)  |
| Prallethrin      | 0.9979 | 0.5 | 2.0  | 106.1(9.3) | 106.1(6.4) | 94.3(5.1)  | 0.9993 | 0.5 | 2.0  | 95.8(6.2)  | 87.3(6.4)   | 88.1(9.2)  |
| Cyfluthrin       | 0.9946 | 0.3 | 1.0  | 104.5(7.1) | 89.4(5.2)  | 91.6(6.3)  | 0.9909 | 0.5 | 2.0  | 103.3(9.5) | 102.1(6.3)  | 93.5(8.3)  |
| Cypermethrin     | 0.9970 | 1.0 | 3.0  | 88.2(5.3)  | 87.5(5.2)  | 101.4(5.2) | 0.9962 | 3.0 | 10.0 | 72.9(6.2)  | 93.2(6.1)   | 103.5(8.4) |
| Boscalid         | 0.9921 | 0.3 | 1.0  | 101.3(4.2) | 108.3(9.2) | 82.5(8.2)  | 0.9923 | 0.3 | 1.0  | 79.9(9.6)  | 80.1(9.4)   | 86.9(5.3)  |
| Quizalofop-ethyl | 0.9933 | 0.3 | 1.0  | 105.3(9.2) | 76.8(9.1)  | 80.5(9.3)  | 0.9938 | 0.3 | 1.0  | 103.5(9.2) | 95.2(6.1)   | 93.4(8.2)  |
| Flucythrinate    | 0.9974 | 0.3 | 1.0  | 114.5(6.1) | 112.6(8.2) | 113.6(5.1) | 0.9931 | 0.5 | 2.0  | 114.4(6.4) | 110.4(8.2)  | 111.7(5.3) |
| Etofenprox       | 0.9933 | 1.0 | 3.0  | 108.5(7.1) | 87.4(6.3)  | 97.5(8.1)  | 0.9992 | 1.0 | 3.0  | 91.5(4.9)  | 92.6(6.2)   | 105.3(8.1) |
| Pyridalyl        | 0.9936 | 1.0 | 3.0  | 101.2(6.2) | 79.1(9.1)  | 96.7(7.2)  | 0.9999 | 1.0 | 3.0  | 107.4(9.6) | 105.5(7.1)  | 102.2(7.2) |
| Fenvalerate      | 0.9981 | 0.5 | 2.0  | 122.2(3.2) | 120.3(9.1) | 121.1(9.1) | 0.9958 | 0.5 | 2.0  | 120.1(8.4) | 120.4(6.2)  | 120.1(7.2) |
| Flumioxazin      | 0.9956 | 1.0 | 3.0  | 104.1(7.3) | 80.2(7.7)  | 95.8(6.2)  | 0.9999 | 1.0 | 3.0  | 108.5(6.3) | 102.5(9.1)  | 109.3(7.2) |
| Pyraclostrobin   | 0.9935 | 3.0 | 10.0 | 115.4(7.1) | 118.0(6.2) | 112.3(5.8) | 0.9908 | 3.0 | 10.0 | 113.5(6.2) | 111.4(9.2)  | 112.1(7.1) |
| tau-Fluvalinate  | 0.9910 | 3.0 | 10.0 | 103.8(5.1) | 104.2(9.3) | 104.1(6.3) | 0.9993 | 3.0 | 10.0 | 105.8(6.2) | 109.4(10.2) | 109.1(9.5) |
| Difenoconazole   | 0.9929 | 1.0 | 3.0  | 114.2(3.2) | 118.3(8.2) | 114.3(5.2) | 0.9913 | 3.0 | 10.0 | 114.3(9.1) | 116.4(7.2)  | 119.7(4.3) |
| Deltamethrin     | 0.9916 | 1.0 | 3.0  | 98.2(6.2)  | 83.1(8.3)  | 96.2(7.0)  | 0.9970 | 1.0 | 3.0  | 102.2(8.1) | 81.8(6.8)   | 88.4(6.1)  |
| Azoxystrobin     | 0.9974 | 0.3 | 1.0  | 116.2(5.9) | 111.1(4.2) | 120.3(7.1) | 0.9973 | 0.3 | 1.0  | 123.4(6.2) | 124.2(5.2)  | 108.5(4.0) |
| Dimethomorph     | 0.9923 | 0.3 | 1.0  | 122.4(6.1) | 120.1(4.0) | 120.9(5.3) | 0.9925 | 0.3 | 1.0  | 120.8(9.2) | 121.2(5.1)  | 121.2(6.3) |
